# Supplementary material for: Computational investigations on the phosphine-ligated CuH-catalyzed conjugate reduction of α-β unsaturated ketones: regioselectivity and stereoselectivity
Source: Royal Society of Chemistry journal article supplement (doi:10.1039/c3ra44015j), 2013-11-12
Supplement: c3ra44015j.pdf [file c3ra44015j.pdf]

# Supporting Information

## Computational Investigations on the Phosphine-ligated CuH-Catalyzed Conjugate Reduction of $\alpha$ - $\beta$ Unsaturated Ketones: Regioselectivity and Stereoselectivity

Hangyu Liu, Wei Zhang, Ling He, Mingliang Luo, Song Qin\*

Key Laboratory of Green Chemistry and Technology, Ministry of Education, College of  
Chemistry, Sichuan University, Chengdu, Sichuan, 610064, China.

Email of corresponding author: qinsong@mail.sc.cninfo.net, qinsong@scu.edu.cn

### CONTENTS:

#### ***Part I: Results and brief discussion on diatomic CuH( $^1\Sigma$ ) model reaction system***

|                                                                                                                                      |   |
|--------------------------------------------------------------------------------------------------------------------------------------|---|
| S1: The summarize energies properties of all optimized stationary points over the diatomic CuH model reaction system.....            | 4 |
| S2. Cartesian coordinates and energies of all optimized stationary points of model reaction system at the M06/6-31G(d, p) level..... | 5 |

#### ***Part II: Ph<sub>3</sub>P-CuH system***

|                                                                                                                                                            |    |
|------------------------------------------------------------------------------------------------------------------------------------------------------------|----|
| S3: The summarize energies of species along all reaction paths over the Ph <sub>3</sub> P-CuH system at the M06/6-31G(d, p) level.....                     | 11 |
| S4. Cartesian coordinates and energies of all optimized structures along 1,4-path over the Ph <sub>3</sub> P-CuH system at the M06 /6-31G(d, p) level..... | 12 |
| S5. Cartesian coordinates and energies of all optimized structures along 1,2-path over the Ph <sub>3</sub> P-CuH system at the M06 /6-31G(d, p) level..... | 23 |

#### ***Part III (R)-SEGPHOS-CuH system***

|                                                                                                                                               |    |
|-----------------------------------------------------------------------------------------------------------------------------------------------|----|
| S6: The summarize energies of species along all reaction paths over the (R)-SEGPHOS-CuH system at the M06 /6-31G(d, p) level.....             | 33 |
| S7. Cartesian coordinates and energies of species along all reaction paths over the (R)-SEGPHOS-CuH system at the M06 /6-31G(d, p) level..... | 34 |
| S8. Gibbs Energies ( $\Delta G^\ddagger$ )* of TS1s and TS2s.....                                                                             | 59 |
| S9. Full citation of Gaussian program.....                                                                                                    | 59 |

## Part I: Results and brief discussion on diatomic CuH( $d^1\Sigma$ ) model reaction system

The energy profiles in the gas-phase system are given in Figure 1. The optimized structures of key stationary points along the reaction pathway are collected in Figure 2.

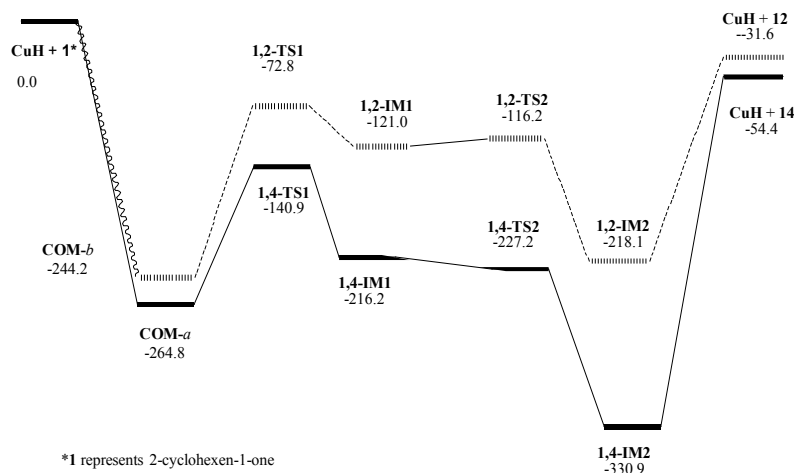

**Figure 1.** The potential energy curves of the gas-phase CuH/I system. Relative energies (in kJ/mol) are listed in the order of M06 /6-31G(d, p)/(BHLYP/6-31G(d, p))

As shown in Figure 2, the addition reaction begins with the coordination of the copper-hydride catalyst to the substrate **1**. In principle, CuH can coordinate to either carbon-carbon double bond or the carbon-oxygen double bond of **1**, and therefore two complexes (CuH-*a* and CuH-*b*) result in the first step of the reaction. Coordination of the CuH to the carbon-carbon (C=C) double bond in **1** leads to the formation of complex CuH-*a*, in which the metal center attaches to the C=C bond with the distances between Cu and two carbon atoms of 1.967 and 1.957 Å, respectively. On the other hand, the catalyst can alternatively coordinate to C=O bond, which leads to the formation of the other complex CuH-*b*, an isomer of CuH-*a*. In this complex, the metal center of the catalyst interacts with the O-end of carbon-oxygen double bond with the Cu-O distance of 1.855 Å. DFT calculations predict that the coordination of CuH to the C=C double bond in CuH-*a* is energetically favored by ca. 20.6 kJ/mol than that to the C=O bond in CuH-*b*.

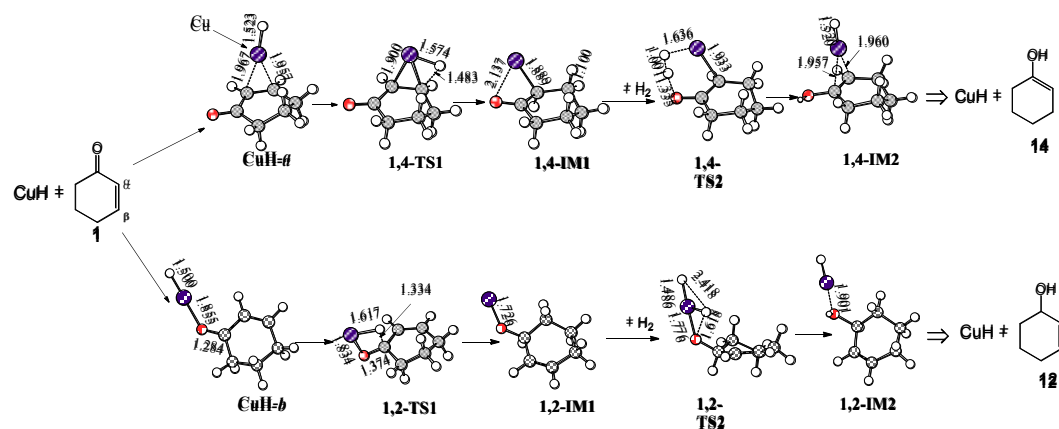

**Figure 2.** The reaction mechanism and the optimized structures calculated at the M06 /6-31G(d,p) level. The bond lengths are in Å.

From these two CuH-substrate complexes, the addition reaction could complete along two distinct paths and arise to the different final products. According to the structures of the final products, these reaction channels are labeled as the 1,4- and 1,2- path (see in Figure 2).

**1,4-paths.** From **CuH-a**, the conversion of this complex involves the 1,4-path. In the 1,4-path, the cleavage of Cu-H bond takes place via 1,4-**TS1**. For this transition state, the Cu-H bond is enlarged to 1.574 Å from 1.523 Å in **CuH-a** complex, and the distance of C<sub>β</sub>-H shortens to 1.483 Å, respectively. This step involves the breakage of Cu-H bond of the catalyst and the formation of two new bonds, as suggested by the bond lengths of Cu-C<sub>α</sub> (1.889 Å) and C<sub>β</sub>-H (1.100 Å) in 1,4-**IM1**, respectively.

Next, from 1,4-**IM1**, an external H<sub>2</sub> molecule might coordinate to the bare Cu center followed by the cleavage of H-H bond via four-centered **TS2**. As a result, one H atom is delivered to the substrate with the recovery of CuH catalyst. As compared to the addition of CuH step, this process in carbocations is very easy, for the step bears a relatively smaller energy barrier than its corresponding CuH addition step.

**1,2-path.** In contrast, from the complex **CuH-b**, the addition of CuH to the C=O double bond can take place via 1,2-**TS1**. In this transition state, the H atom connecting with metal center transfers to C-end of the C=O double bond, accompanying by the migration of Cu center to O atom. As a result, the following step breaks the Cu-H bond and generates the intermediate 1,2-**IM1** with the bond length of Cu-O of 1.726 Å. From 1,2-**IM1**, an external H<sub>2</sub> molecule might coordinate to the bare Cu center and donate one H atom to recover CuH catalyst via 1,2-**TS2**.

In summary, the entire reaction can be generally divided into two subsequent stages: (1) the addition of CuH to the unsaturated bonds of the substrate; (2) the recovery of CuH catalyst. calculations indicate that the 1,4-path via intermediate 1,4-**IM1** might be predominant for its major part in potential energy surface is the lowest in all paths. The rate-determining step can be identified as the CuH addition step of the overall reactions. It should be emphasized that after the formation of **IM1**, the structures of the final products are also determined. This means that the addition step of CuH to the unsaturated bond in the gas-phase system is responsible for the region-selectivity of the reaction, while hydrogen molecule for regenerating CuH catalyst.

**S1: The summarize energies properties of all optimized stationary points over the diatomic CuH model reaction system.**

| Species                        | M06 /6-31G(d,p) |        |
|--------------------------------|-----------------|--------|
|                                | $E_{zpe}$       | $E_r$  |
| <b>CuH</b>                     | -1640.683582    |        |
| <b>1</b>                       | -308.321814     |        |
| <b>H<sub>2</sub></b>           | -1.159205       |        |
| <b>CuH + 1 + H<sub>2</sub></b> | -1950.164601    | 0.0    |
| <b>CuH-a</b>                   | -1949.106266    |        |
| <b>CuH-a + H<sub>2</sub></b>   | -1950.265471    | -264.8 |
| <b>1,4-TS1</b>                 | -1949.059065    |        |
| <b>1,4-TS1 + H<sub>2</sub></b> | -1950.21827     | -140.9 |
| <b>1,4-IM1</b>                 | -1949.087745    |        |
| <b>1,4-IM1 + H<sub>2</sub></b> | -1950.24695     | -216.2 |
| <b>1,4-TS2</b>                 | -1950.251142    | -227.2 |
| <b>1,4-IM2</b>                 | -1950.290652    | -330.9 |
| <b>14-PRO</b>                  | -309.501739     |        |
| <b>CuH + 14</b>                | -1950.185321    | -54.4  |
| <b>CuH-b</b>                   | -1949.098401    |        |
| <b>CuH-b + H<sub>2</sub></b>   | -1950.257606    | -244.2 |
| <b>1,2-TS1</b>                 | -1949.033126    |        |
| <b>1,2-TS1 + H<sub>2</sub></b> | -1950.192331    | -72.8  |
| <b>1,2-IM1</b>                 | -1949.051475    |        |
| <b>1,2-IM1 + H<sub>2</sub></b> | -1950.21068     | -121.0 |
| <b>1,2-TS2</b>                 | -1950.208876    | -116.2 |
| <b>1,2-IM2</b>                 | -1950.247657    | -218.1 |
| <b>14-PRO</b>                  | -309.493067     |        |
| <b>CuH + 12</b>                | -1950.176649    | -31.6  |

## S2. Cartesian coordinates and energies of all optimized stationary points of model reaction system at the M06 /6-31G(d, p) level.

1:

Standard orientation:

| Center Number | Atomic Number | Atomic Type | Coordinates (Angstroms) |           |           |
|---------------|---------------|-------------|-------------------------|-----------|-----------|
|               |               |             | X                       | Y         | Z         |
| 1             | 6             | 0           | 0.324395                | -1.227955 | 0.278335  |
| 2             | 6             | 0           | -1.059767               | -1.154270 | -0.352372 |
| 3             | 6             | 0           | -1.806793               | 0.082205  | 0.132685  |
| 4             | 6             | 0           | -0.964008               | 1.313559  | 0.028108  |
| 5             | 6             | 0           | 0.373475                | 1.283594  | -0.056211 |
| 6             | 6             | 0           | 1.136929                | 0.023330  | 0.017284  |
| 7             | 8             | 0           | 2.349934                | 0.001514  | -0.080538 |
| 8             | 1             | 0           | 0.905463                | -2.090345 | -0.064306 |
| 9             | 1             | 0           | 0.227535                | -1.323367 | 1.372316  |
| 10            | 1             | 0           | -1.634415               | -2.062152 | -0.134701 |
| 11            | 1             | 0           | -0.956742               | -1.099776 | -1.445578 |
| 12            | 1             | 0           | -2.113214               | -0.047829 | 1.184760  |
| 13            | 1             | 0           | -2.741081               | 0.221649  | -0.426530 |
| 14            | 1             | 0           | -1.478034               | 2.275383  | 0.023629  |
| 15            | 1             | 0           | 0.965625                | 2.191549  | -0.152261 |

Zero-point correction= 0.127051 (Hartree/Particle)  
Thermal correction to Gibbs Free Energy= 0.097155  
Sum of electronic and zero-point Energies= -308.321814

CuH:

Standard orientation:

| Center Number | Atomic Number | Atomic Type | Coordinates (Angstroms) |          |           |
|---------------|---------------|-------------|-------------------------|----------|-----------|
|               |               |             | X                       | Y        | Z         |
| 1             | 29            | 0           | 0.000000                | 0.000000 | 0.047536  |
| 2             | 1             | 0           | 0.000000                | 0.000000 | -1.378542 |

Zero-point correction= 0.004829 (Hartree/Particle)  
Thermal correction to Gibbs Free Energy= -0.01408  
Sum of electronic and zero-point Energies= -1640.683582

H<sub>2</sub>:

Standard orientation:

| Center Number | Atomic Number | Atomic Type | Coordinates (Angstroms) |          |           |
|---------------|---------------|-------------|-------------------------|----------|-----------|
|               |               |             | X                       | Y        | Z         |
| 1             | 1             | 0           | 0.000000                | 0.000000 | 0.370365  |
| 2             | 1             | 0           | 0.000000                | 0.000000 | -0.370365 |

Zero-point correction= 0.010096 (Hartree/Particle)  
Thermal correction to Gibbs Free Energy= -0.001386  
Sum of electronic and zero-point Energies= -1.159205

CuH-a:

Standard orientation:

| Center Number | Atomic Number | Atomic Type | Coordinates (Angstroms) |           |           |
|---------------|---------------|-------------|-------------------------|-----------|-----------|
|               |               |             | X                       | Y         | Z         |
| 1             | 6             | 0           | -1.893155               | 0.429136  | -0.318699 |
| 2             | 6             | 0           | -0.878682               | 1.479607  | -0.762052 |
| 3             | 6             | 0           | 0.039019                | 1.888611  | 0.384594  |
| 4             | 6             | 0           | 0.594831                | 0.701343  | 1.116134  |
| 5             | 6             | 0           | -0.053806               | -0.523657 | 1.138479  |
| 6             | 6             | 0           | -1.200724               | -0.790429 | 0.242032  |

|    |    |   |           |           |           |
|----|----|---|-----------|-----------|-----------|
| 7  | 8  | 0 | -1.533200 | -1.930693 | -0.025881 |
| 8  | 1  | 0 | -2.548309 | 0.109535  | -1.134994 |
| 9  | 1  | 0 | -2.528173 | 0.840416  | 0.482035  |
| 10 | 1  | 0 | -1.386888 | 2.356896  | -1.176464 |
| 11 | 1  | 0 | -0.261231 | 1.067190  | -1.574889 |
| 12 | 1  | 0 | -0.512582 | 2.507564  | 1.111155  |
| 13 | 1  | 0 | 0.862052  | 2.512820  | 0.013310  |
| 14 | 1  | 0 | 1.370680  | 0.897554  | 1.857402  |
| 15 | 1  | 0 | 0.221919  | -1.317413 | 1.832204  |
| 16 | 29 | 0 | 1.217150  | -0.424053 | -0.359051 |
| 17 | 1  | 0 | 2.105874  | -0.339142 | -1.593148 |

Zero-point correction= 0.134367 (Hartree/Particle)  
 Thermal correction to Gibbs Free Energy= 0.100793  
 Sum of electronic and zero-point Energies= -1949.106266

#### 1,4-TS1:

Standard orientation:

| Center Number | Atomic Number | Atomic Type | Coordinates (Angstroms) |           |           |
|---------------|---------------|-------------|-------------------------|-----------|-----------|
|               |               |             | X                       | Y         | Z         |
| 1             | 6             | 0           | -1.801243               | 0.495606  | -0.641088 |
| 2             | 6             | 0           | -0.776401               | 1.622212  | -0.670659 |
| 3             | 6             | 0           | -0.148779               | 1.787954  | 0.703390  |
| 4             | 6             | 0           | 0.647138                | 0.549191  | 1.028348  |
| 5             | 6             | 0           | -0.063024               | -0.761557 | 0.744912  |
| 6             | 6             | 0           | -1.374853               | -0.758383 | 0.124281  |
| 7             | 8             | 0           | -2.155895               | -1.699402 | 0.186903  |
| 8             | 1             | 0           | -2.105056               | 0.184748  | -1.648398 |
| 9             | 1             | 0           | -2.722369               | 0.841579  | -0.150865 |
| 10            | 1             | 0           | -1.233750               | 2.555282  | -1.020700 |
| 11            | 1             | 0           | 0.040069                | 1.402082  | -1.384350 |
| 12            | 1             | 0           | -0.943553               | 1.880919  | 1.460687  |
| 13            | 1             | 0           | 0.475721                | 2.687995  | 0.761997  |
| 14            | 1             | 0           | 1.860819                | 0.911776  | 0.256306  |
| 15            | 1             | 0           | 0.072250                | -1.549913 | 1.485407  |
| 16            | 1             | 0           | 1.143534                | 0.572811  | 2.000815  |
| 17            | 29            | 0           | 1.440085                | -0.465593 | -0.379008 |

Zero-point correction= 0.134603 (Hartree/Particle)  
 Thermal correction to Gibbs Free Energy= 0.101778  
 Sum of electronic and zero-point Energies= -1949.059065

#### 1,4-IM1:

Standard orientation:

| Center Number | Atomic Number | Atomic Type | Coordinates (Angstroms) |           |           |
|---------------|---------------|-------------|-------------------------|-----------|-----------|
|               |               |             | X                       | Y         | Z         |
| 1             | 6             | 0           | 1.041606                | 1.479785  | -0.138441 |
| 2             | 6             | 0           | 2.106446                | 0.594904  | -0.770715 |
| 3             | 6             | 0           | 2.443678                | -0.559252 | 0.162068  |
| 4             | 6             | 0           | 1.238782                | -1.482184 | 0.308666  |
| 5             | 6             | 0           | -0.033913               | -0.726878 | 0.645729  |
| 6             | 6             | 0           | -0.112367               | 0.719777  | 0.465893  |
| 7             | 8             | 0           | -1.145302               | 1.371077  | 0.818373  |
| 8             | 1             | 0           | 0.643167                | 2.230492  | -0.832669 |
| 9             | 1             | 0           | 1.474495                | 2.048724  | 0.699537  |
| 10            | 1             | 0           | 2.995968                | 1.190267  | -1.011447 |
| 11            | 1             | 0           | 1.734186                | 0.186967  | -1.724697 |
| 12            | 1             | 0           | 2.725855                | -0.151955 | 1.146226  |
| 13            | 1             | 0           | 3.309349                | -1.123695 | -0.207535 |
| 14            | 1             | 0           | 1.125996                | -2.043095 | -0.630477 |
| 15            | 1             | 0           | -0.501932               | -1.031946 | 1.590026  |
| 16            | 1             | 0           | 1.434627                | -2.237470 | 1.081125  |
| 17            | 29            | 0           | -1.582231               | -0.351511 | -0.368837 |

Zero-point correction= 0.13936 (Hartree/Particle)

Thermal correction to Gibbs Free Energy= 0.106172  
Sum of electronic and zero-point Energies= -1949.087745

**1,4-TS2:**

Standard orientation:

| Center Number | Atomic Number | Atomic Type | Coordinates (Angstroms) |           |           |
|---------------|---------------|-------------|-------------------------|-----------|-----------|
|               |               |             | X                       | Y         | Z         |
| 1             | 6             | 0           | 1.027806                | 1.459316  | -0.282253 |
| 2             | 6             | 0           | 2.072103                | 0.530359  | -0.883188 |
| 3             | 6             | 0           | 2.493749                | -0.503338 | 0.151670  |
| 4             | 6             | 0           | 1.323431                | -1.413393 | 0.504288  |
| 5             | 6             | 0           | 0.038376                | -0.644293 | 0.754111  |
| 6             | 6             | 0           | -0.052496               | 0.748305  | 0.485033  |
| 7             | 8             | 0           | -1.035377               | 1.492712  | 0.911049  |
| 8             | 1             | 0           | 0.551508                | 2.102102  | -1.034562 |
| 9             | 1             | 0           | 1.496208                | 2.149746  | 0.436600  |
| 10            | 1             | 0           | 2.931029                | 1.109504  | -1.242906 |
| 11            | 1             | 0           | 1.652525                | 0.013953  | -1.762031 |
| 12            | 1             | 0           | 2.834291                | 0.024551  | 1.056296  |
| 13            | 1             | 0           | 3.342817                | -1.099282 | -0.204763 |
| 14            | 1             | 0           | 1.194777                | -2.154853 | -0.297851 |
| 15            | 1             | 0           | -0.523962               | -0.952674 | 1.643430  |
| 16            | 1             | 0           | 1.566307                | -1.997469 | 1.401972  |
| 17            | 29            | 0           | -1.489810               | -0.465164 | -0.415656 |
| 18            | 1             | 0           | -2.137695               | 0.905001  | 0.441570  |
| 19            | 1             | 0           | -2.838099               | 0.385746  | -0.050087 |

Zero-point correction= 0.152219 (Hartree/Particle)  
Thermal correction to Gibbs Free Energy= 0.118402  
Sum of electronic and zero-point Energies= -1950.251142

**1,4-IM2:**

Standard orientation:

| Center Number | Atomic Number | Atomic Type | Coordinates (Angstroms) |           |           |
|---------------|---------------|-------------|-------------------------|-----------|-----------|
|               |               |             | X                       | Y         | Z         |
| 1             | 6             | 0           | 0.483410                | 1.358232  | -0.774757 |
| 2             | 6             | 0           | 1.549587                | 0.325498  | -1.121853 |
| 3             | 6             | 0           | 2.272838                | -0.112488 | 0.144263  |
| 4             | 6             | 0           | 1.327845                | -0.829233 | 1.104513  |
| 5             | 6             | 0           | -0.016457               | -0.143862 | 1.203483  |
| 6             | 6             | 0           | -0.382937               | 0.883579  | 0.354321  |
| 7             | 1             | 0           | -0.144813               | 1.579425  | -1.653181 |
| 8             | 1             | 0           | 0.949756                | 2.308780  | -0.471014 |
| 9             | 1             | 0           | 2.248748                | 0.740466  | -1.856072 |
| 10            | 1             | 0           | 1.064940                | -0.542521 | -1.595938 |
| 11            | 1             | 0           | 2.683841                | 0.779372  | 0.641145  |
| 12            | 1             | 0           | 3.124813                | -0.758746 | -0.097039 |
| 13            | 1             | 0           | 1.205368                | -1.879009 | 0.790044  |
| 14            | 1             | 0           | -0.587254               | -0.239922 | 2.127511  |
| 15            | 1             | 0           | 1.777342                | -0.876246 | 2.104930  |
| 16            | 8             | 0           | -1.398342               | 1.708565  | 0.740798  |
| 17            | 1             | 0           | -1.727712               | 2.187573  | -0.029246 |
| 18            | 29            | 0           | -1.008134               | -0.835741 | -0.339246 |
| 19            | 1             | 0           | -1.578104               | -1.621557 | -1.509205 |

Zero-point correction= 0.158207 (Hartree/Particle)  
Thermal correction to Gibbs Free Energy= 0.124909  
Sum of electronic and zero-point Energies= -1950.290652

**14:**

Standard orientation:

| Center Number | Atomic Number | Atomic Type | Coordinates (Angstroms) |   |   |
|---------------|---------------|-------------|-------------------------|---|---|
|               |               |             | X                       | Y | Z |

|    |   |   |           |           |           |
|----|---|---|-----------|-----------|-----------|
| 1  | 6 | 0 | -0.416535 | 1.241750  | 0.069623  |
| 2  | 6 | 0 | 1.059554  | 1.233575  | -0.312281 |
| 3  | 6 | 0 | 1.774892  | 0.073155  | 0.365866  |
| 4  | 6 | 0 | 1.200556  | -1.257248 | -0.108982 |
| 5  | 6 | 0 | -0.298953 | -1.250676 | -0.102273 |
| 6  | 6 | 0 | -1.016385 | -0.128941 | -0.000282 |
| 7  | 1 | 0 | -0.978509 | 1.916161  | -0.597624 |
| 8  | 1 | 0 | -0.548471 | 1.643828  | 1.088182  |
| 9  | 1 | 0 | 1.522252  | 2.193509  | -0.052423 |
| 10 | 1 | 0 | 1.149394  | 1.121968  | -1.403284 |
| 11 | 1 | 0 | 1.642484  | 0.159169  | 1.455378  |
| 12 | 1 | 0 | 2.853988  | 0.116801  | 0.172325  |
| 13 | 1 | 0 | 1.577706  | -1.479061 | -1.122007 |
| 14 | 1 | 0 | -0.835155 | -2.196057 | -0.167370 |
| 15 | 1 | 0 | 1.573934  | -2.073479 | 0.525493  |
| 16 | 8 | 0 | -2.379396 | -0.195827 | 0.075767  |
| 17 | 1 | 0 | -2.741231 | 0.694089  | 0.025169  |

Zero-point correction= 0.150266 (Hartree/Particle)  
 Thermal correction to Gibbs Free Energy= 0.119711  
 Sum of electronic and zero-point Energies= -309.501739

#### CuH-b:

Standard orientation:

| Center Number | Atomic Number | Atomic Type | Coordinates (Angstroms) |           |           |
|---------------|---------------|-------------|-------------------------|-----------|-----------|
|               |               |             | X                       | Y         | Z         |
| 1             | 29            | 0           | 1.604525                | -0.169482 | -0.441058 |
| 2             | 1             | 0           | 1.635900                | -0.891818 | -1.755634 |
| 3             | 6             | 0           | -0.642635               | -0.901394 | 1.026719  |
| 4             | 6             | 0           | -1.593868               | -1.308867 | -0.089916 |
| 5             | 6             | 0           | -2.598095               | -0.197912 | -0.379137 |
| 6             | 6             | 0           | -1.951353               | 1.148025  | -0.449279 |
| 7             | 6             | 0           | -0.713813               | 1.396279  | 0.007700  |
| 8             | 6             | 0           | 0.091833                | 0.357785  | 0.648932  |
| 9             | 8             | 0           | 1.224502                | 0.647897  | 1.180558  |
| 10            | 1             | 0           | 0.084360                | -1.686537 | 1.263220  |
| 11            | 1             | 0           | -1.200253               | -0.690234 | 1.953966  |
| 12            | 1             | 0           | -2.110966               | -2.242361 | 0.157431  |
| 13            | 1             | 0           | -0.989539               | -1.498396 | -0.988910 |
| 14            | 1             | 0           | -3.376017               | -0.169226 | 0.403074  |
| 15            | 1             | 0           | -3.138468               | -0.395717 | -1.314413 |
| 16            | 1             | 0           | -2.528675               | 1.962102  | -0.886955 |
| 17            | 1             | 0           | -0.256001               | 2.380503  | -0.075665 |

Zero-point correction= 0.13447 (Hartree/Particle)  
 Thermal correction to Gibbs Free Energy= 0.100853  
 Sum of electronic and zero-point Energies= -1949.098401

#### 1,2-TS1:

Standard orientation:

| Center Number | Atomic Number | Atomic Type | Coordinates (Angstroms) |           |           |
|---------------|---------------|-------------|-------------------------|-----------|-----------|
|               |               |             | X                       | Y         | Z         |
| 1             | 29            | 0           | 1.956284                | -0.076451 | -0.335676 |
| 2             | 1             | 0           | 0.473770                | -0.221471 | -0.964849 |
| 3             | 6             | 0           | -0.765749               | -1.114796 | 0.597797  |
| 4             | 6             | 0           | -1.969001               | -1.243008 | -0.321915 |
| 5             | 6             | 0           | -2.874807               | -0.021960 | -0.190708 |
| 6             | 6             | 0           | -2.090040               | 1.255343  | -0.184571 |
| 7             | 6             | 0           | -0.767032               | 1.302781  | -0.014056 |
| 8             | 6             | 0           | 0.078818                | 0.103729  | 0.267438  |
| 9             | 8             | 0           | 1.054696                | 0.357752  | 1.201119  |
| 10            | 1             | 0           | -0.129131               | -2.009090 | 0.582240  |
| 11            | 1             | 0           | -1.084917               | -0.971074 | 1.641640  |
| 12            | 1             | 0           | -2.528955               | -2.162264 | -0.111233 |
| 13            | 1             | 0           | -1.618240               | -1.321477 | -1.363209 |



|    |   |   |           |           |           |
|----|---|---|-----------|-----------|-----------|
| 14 | 1 | 0 | -3.462002 | -0.087163 | 0.740467  |
| 15 | 1 | 0 | -3.616752 | -0.001566 | -1.001230 |
| 16 | 1 | 0 | -2.646363 | 2.184715  | -0.311043 |
| 17 | 1 | 0 | -0.230337 | 2.251908  | -0.011048 |

Zero-point correction= 0.134525 (Hartree/Particle)  
Thermal correction to Gibbs Free Energy= 0.10182  
Sum of electronic and zero-point Energies= -1949.033126

#### 1,2-IM1:

Standard orientation:

| Center Number | Atomic Number | Atomic Type | Coordinates (Angstroms) |           |           |
|---------------|---------------|-------------|-------------------------|-----------|-----------|
|               |               |             | X                       | Y         | Z         |
| 1             | 29            | 0           | -2.158521               | -0.199847 | -0.110863 |
| 2             | 6             | 0           | 0.432537                | -0.896666 | -0.013178 |
| 3             | 6             | 0           | 1.823673                | -1.390370 | 0.340325  |
| 4             | 6             | 0           | 2.878444                | -0.516201 | -0.334990 |
| 5             | 6             | 0           | 2.539405                | 0.943202  | -0.247553 |
| 6             | 6             | 0           | 1.345504                | 1.400325  | 0.133503  |
| 7             | 6             | 0           | 0.187817                | 0.519640  | 0.509200  |
| 8             | 8             | 0           | -0.995330               | 1.068923  | 0.016167  |
| 9             | 1             | 0           | -0.366160               | -1.543032 | 0.394200  |
| 10            | 1             | 0           | 0.302900                | -0.867093 | -1.107439 |
| 11            | 1             | 0           | 1.958805                | -2.442335 | 0.059869  |
| 12            | 1             | 0           | 1.952818                | -1.335887 | 1.432041  |
| 13            | 1             | 0           | 2.976151                | -0.801451 | -1.395867 |
| 14            | 1             | 0           | 3.867670                | -0.701847 | 0.107057  |
| 15            | 1             | 0           | 3.321538                | 1.650948  | -0.524605 |
| 16            | 1             | 0           | 1.146059                | 2.470648  | 0.175855  |
| 17            | 1             | 0           | 0.155695                | 0.454646  | 1.620732  |

Zero-point correction= 0.139407 (Hartree/Particle)  
Thermal correction to Gibbs Free Energy= 0.105747  
Sum of electronic and zero-point Energies= -1949.051475

#### 1,2-TS2:

Standard orientation:

| Center Number | Atomic Number | Atomic Type | Coordinates (Angstroms) |           |           |
|---------------|---------------|-------------|-------------------------|-----------|-----------|
|               |               |             | X                       | Y         | Z         |
| 1             | 29            | 0           | -2.056211               | -0.177428 | -0.276924 |
| 2             | 6             | 0           | 0.617381                | -0.991486 | 0.433525  |
| 3             | 6             | 0           | 2.110312                | -1.271135 | 0.375021  |
| 4             | 6             | 0           | 2.775158                | -0.376749 | -0.667860 |
| 5             | 6             | 0           | 2.266663                | 1.031887  | -0.606858 |
| 6             | 6             | 0           | 1.199480                | 1.400479  | 0.106162  |
| 7             | 6             | 0           | 0.354549                | 0.437575  | 0.887345  |
| 8             | 8             | 0           | -1.010393               | 0.787741  | 0.785660  |
| 9             | 1             | 0           | 0.091120                | -1.696020 | 1.092748  |
| 10            | 1             | 0           | 0.181953                | -1.093347 | -0.575249 |
| 11            | 1             | 0           | 2.304631                | -2.327569 | 0.156445  |
| 12            | 1             | 0           | 2.549668                | -1.069223 | 1.363651  |
| 13            | 1             | 0           | 2.595703                | -0.779139 | -1.678379 |
| 14            | 1             | 0           | 3.866757                | -0.384436 | -0.543340 |
| 15            | 1             | 0           | 2.808333                | 1.782910  | -1.182241 |
| 16            | 1             | 0           | 0.876695                | 2.441054  | 0.138788  |
| 17            | 1             | 0           | 0.598551                | 0.527501  | 1.962572  |
| 18            | 1             | 0           | -1.193338               | 0.842292  | -0.821222 |
| 19            | 1             | 0           | -2.908080               | -0.783967 | -1.332248 |

Zero-point correction= 0.152485 (Hartree/Particle)  
Thermal correction to Gibbs Free Energy= 0.11836  
Sum of electronic and zero-point Energies= -1950.208876

#### 1,2-IM2:

Standard orientation:

| Center Number | Atomic Number | Atomic Type | Coordinates (Angstroms) |           |           |
|---------------|---------------|-------------|-------------------------|-----------|-----------|
|               |               |             | X                       | Y         | Z         |
| 1             | 29            | 0           | -2.140499               | -0.179228 | -0.016618 |
| 2             | 6             | 0           | 0.423973                | -0.859115 | -0.173856 |
| 3             | 6             | 0           | 1.753307                | -1.459153 | 0.251635  |
| 4             | 6             | 0           | 2.914895                | -0.619360 | -0.271080 |
| 5             | 6             | 0           | 2.683114                | 0.846562  | -0.065079 |
| 6             | 6             | 0           | 1.496491                | 1.364981  | 0.259503  |
| 7             | 6             | 0           | 0.265372                | 0.538510  | 0.402847  |
| 8             | 8             | 0           | -0.861902               | 1.210709  | -0.229420 |
| 9             | 1             | 0           | -0.448537               | -1.452459 | 0.139973  |
| 10            | 1             | 0           | 0.381935                | -0.789806 | -1.273221 |
| 11            | 1             | 0           | 1.835301                | -2.494201 | -0.097485 |
| 12            | 1             | 0           | 1.798214                | -1.495124 | 1.350214  |
| 13            | 1             | 0           | 3.068832                | -0.809285 | -1.346080 |
| 14            | 1             | 0           | 3.855534                | -0.915805 | 0.212013  |
| 15            | 1             | 0           | 3.539060                | 1.511764  | -0.177126 |
| 16            | 1             | 0           | 1.385447                | 2.435515  | 0.432159  |
| 17            | 1             | 0           | -0.044900               | 0.480877  | 1.457203  |
| 18            | 1             | 0           | -0.596674               | 1.472171  | -1.122590 |
| 19            | 1             | 0           | -3.027445               | -1.306254 | 0.318396  |

Zero-point correction=0.158791 (Hartree/Particle)  
Thermal correction to Gibbs Free Energy= 0.124799  
Sum of electronic and zero-point Energies= -1950.247657

**12:**

Standard orientation:

| Center Number | Atomic Number | Atomic Type | Coordinates (Angstroms) |           |           |
|---------------|---------------|-------------|-------------------------|-----------|-----------|
|               |               |             | X                       | Y         | Z         |
| 1             | 6             | 0           | -0.228832               | -1.215920 | -0.211467 |
| 2             | 6             | 0           | 1.214615                | -1.135475 | 0.265521  |
| 3             | 6             | 0           | 1.873187                | 0.147993  | -0.233714 |
| 4             | 6             | 0           | 0.971025                | 1.335749  | -0.074636 |
| 5             | 6             | 0           | -0.326869               | 1.235446  | 0.218746  |
| 6             | 6             | 0           | -1.048538               | -0.073736 | 0.372531  |
| 7             | 8             | 0           | -2.346521               | -0.010171 | -0.190172 |
| 8             | 1             | 0           | -0.695809               | -2.174447 | 0.043899  |
| 9             | 1             | 0           | -0.255142               | -1.128187 | -1.310935 |
| 10            | 1             | 0           | 1.786455                | -2.012950 | -0.059868 |
| 11            | 1             | 0           | 1.228394                | -1.143216 | 1.366137  |
| 12            | 1             | 0           | 2.146726                | 0.042215  | -1.296825 |
| 13            | 1             | 0           | 2.821219                | 0.327575  | 0.292321  |
| 14            | 1             | 0           | 1.416299                | 2.322791  | -0.205169 |
| 15            | 1             | 0           | -0.941157               | 2.127601  | 0.345180  |
| 16            | 1             | 0           | -1.223517               | -0.269684 | 1.443459  |
| 17            | 1             | 0           | -2.238823               | 0.225333  | -1.118706 |

Zero-point correction= 0.150599 (Hartree/Particle)  
Thermal correction to Gibbs Free Energy= 0.120465  
Sum of electronic and zero-point Energies= -309.493067

## Part II: $Ph_3P-CuH$ system

**S3: The summarize energies of species in the  $Ph_3P-CuH/1/H_2$  system at the M06/6-31G(d, p) level.**

| species                                   | M06(PCM)/6-31G(d,p) |                |                   |                    |
|-------------------------------------------|---------------------|----------------|-------------------|--------------------|
|                                           | SCF <sub>PCM</sub>  | G <sub>c</sub> | G <sub>solv</sub> | □G <sub>solv</sub> |
| H <sub>2</sub>                            | -1.1693618          | -0.001386      | -1.1707478        |                    |
| <b>1</b>                                  | -308.4568858        | 0.097155       | -308.3634875      |                    |
| Ph <sub>3</sub> P-CuH                     | -2676.515427        | 0.231149       | -2676.284278      |                    |
| Ph <sub>3</sub> P-CuH + H <sub>2</sub> +1 |                     |                | -2985.814756      | 0.0                |
| 1,4-COM1                                  | -2985.039832        | 0.355266       | -2984.684566      |                    |
| 1,4-COM1 + H <sub>2</sub>                 |                     |                | -2985.855314      | -106.5             |
| 1,4-TS1                                   | -2985.018102        | 0.352548       | -2984.665554      |                    |
| 1,4- TS1 + H <sub>2</sub>                 |                     |                | -2985.836301      | -56.6              |
| 1,4-IM1                                   | -2985.045593        | 0.356358       | -2984.689235      |                    |
| 1,4-IM1 + H <sub>2</sub>                  |                     |                | -2985.859983      | -118.7             |
| 14-COM2- H <sub>2</sub>                   | -2986.222689        | 0.373133       | -2985.849556      | -91.4              |
| 1,4-TS2- H <sub>2</sub>                   | -2986.206638        | 0.371449       | -2985.835189      | -53.6              |
| 14-COM3- H <sub>2</sub>                   | -2986.228344        | 0.376346       | -2985.851998      | -97.8              |
| 14pro                                     | -309.6599427        | 0.11972        | -309.5402227      |                    |
| 14pro+Ph3P-CuH                            |                     |                | -2985.8245        | -25.6              |
| 1,2-COM1                                  | -2985.013468        | 0.350478       | -2984.66299       |                    |
| 1,2-COM1 + H <sub>2</sub>                 |                     |                | -2985.833738      | -49.8              |
| 1,2-TS1                                   | -2985.002988        | 0.351273       | -2984.651715      |                    |
| 1,2-TS1 + H <sub>2</sub>                  |                     |                | -2985.822462      | -20.2              |
| 1,2-IM1                                   | -2985.032298        | 0.357667       | -2984.674631      |                    |
| 1,2-IM1 + H <sub>2</sub>                  |                     |                | -2985.845379      | -80.4              |
| 12-COM2- H <sub>2</sub>                   | -2986.205298        | 0.372793       | -2985.832505      | -46.6              |
| 1,2-TS2- H <sub>2</sub>                   | -2986.170322        | 0.373084       | -2985.797238      | 46.0               |
| 12-COM3- H <sub>2</sub>                   | -2986.203597        | 0.37412        | -2985.829477      | -38.6              |
| 12pro                                     | -309.6529324        | 0.120464       | -309.5324684      |                    |
| 12pro+Ph3P-CuH                            |                     |                | -2985.816746      | -5.2               |

**S4. Cartesian coordinates and energies of all optimized structures along 1,4-path over the Ph<sub>3</sub>P-CuH system at the M06/6-31G(d, p) level.**

**Ph<sub>3</sub>P-CuH:**

Standard orientation:

| Center Number | Atomic Number | Atomic Type | Coordinates (Angstroms) |           |           |
|---------------|---------------|-------------|-------------------------|-----------|-----------|
|               |               |             | X                       | Y         | Z         |
| 1             | 29            | 0           | 0.000172                | -0.791447 | 2.413193  |
| 2             | 15            | 0           | -0.000007               | -0.019321 | 0.437002  |
| 3             | 1             | 0           | 0.000261                | -1.587226 | 3.704562  |
| 4             | 6             | 0           | 0.000109                | 1.762635  | 0.075923  |
| 5             | 6             | 0           | -1.206500               | 2.463803  | 0.005663  |
| 6             | 6             | 0           | 1.206813                | 2.463597  | 0.005290  |
| 7             | 6             | 0           | -1.204164               | 3.844941  | -0.150916 |
| 8             | 1             | 0           | -2.150950               | 1.924952  | 0.071188  |
| 9             | 6             | 0           | 1.204660                | 3.844737  | -0.151282 |
| 10            | 1             | 0           | 2.151197                | 1.924594  | 0.070515  |
| 11            | 6             | 0           | 0.000295                | 4.537502  | -0.231172 |
| 12            | 1             | 0           | -2.147486               | 4.383055  | -0.210007 |
| 13            | 1             | 0           | 2.148053                | 4.382694  | -0.210669 |
| 14            | 1             | 0           | 0.000370                | 5.617969  | -0.353698 |
| 15            | 6             | 0           | 1.470254                | -0.690994 | -0.399126 |
| 16            | 6             | 0           | 1.806752                | -0.504317 | -1.742370 |
| 17            | 6             | 0           | 2.297578                | -1.460480 | 0.422292  |
| 18            | 6             | 0           | 2.953695                | -1.097604 | -2.254743 |
| 19            | 1             | 0           | 1.180792                | 0.115317  | -2.383625 |
| 20            | 6             | 0           | 3.446169                | -2.051682 | -0.090506 |
| 21            | 1             | 0           | 2.001488                | -1.572130 | 1.467666  |
| 22            | 6             | 0           | 3.769656                | -1.872365 | -1.430784 |
| 23            | 1             | 0           | 3.217010                | -0.955142 | -3.300330 |
| 24            | 1             | 0           | 4.084334                | -2.650386 | 0.554581  |
| 25            | 1             | 0           | 4.666191                | -2.333408 | -1.839179 |
| 26            | 6             | 0           | -1.470483               | -0.690755 | -0.398920 |
| 27            | 6             | 0           | -2.297322               | -1.460880 | 0.422388  |
| 28            | 6             | 0           | -1.807586               | -0.503331 | -1.741909 |
| 29            | 6             | 0           | -3.445985               | -2.052038 | -0.090292 |
| 30            | 1             | 0           | -2.000824               | -1.573002 | 1.467595  |
| 31            | 6             | 0           | -2.954615               | -1.096557 | -2.254162 |
| 32            | 1             | 0           | -1.182064               | 0.116907  | -2.383010 |
| 33            | 6             | 0           | -3.770060               | -1.871997 | -1.430332 |
| 34            | 1             | 0           | -4.083783               | -2.651225 | 0.554711  |
| 35            | 1             | 0           | -3.218408               | -0.953501 | -3.299548 |
| 36            | 1             | 0           | -4.666670               | -2.332980 | -1.838632 |

Zero-point correction= 0.280278 (Hartree/Particle)

Thermal correction to Gibbs Free Energy= 0.231149

Sum of electronic and zero-point Energies= -2676.224158

SCF- Energy: M06 (PCM, toluene)/6-31G(d,p) = -2676.515427 (a.u.)

**1:**

Standard orientation:

| Center Number | Atomic Number | Atomic Type | Coordinates (Angstroms) |           |           |
|---------------|---------------|-------------|-------------------------|-----------|-----------|
|               |               |             | X                       | Y         | Z         |
| 1             | 6             | 0           | 0.324395                | -1.227955 | 0.278335  |
| 2             | 6             | 0           | -1.059767               | -1.154270 | -0.352372 |
| 3             | 6             | 0           | -1.806793               | 0.082205  | 0.132685  |
| 4             | 6             | 0           | -0.964008               | 1.313559  | 0.028108  |
| 5             | 6             | 0           | 0.373475                | 1.283594  | -0.056211 |
| 6             | 6             | 0           | 1.136929                | 0.023330  | 0.017284  |
| 7             | 8             | 0           | 2.349934                | 0.001514  | -0.080538 |
| 8             | 1             | 0           | 0.905463                | -2.090345 | -0.064306 |
| 9             | 1             | 0           | 0.227535                | -1.323367 | 1.372316  |
| 10            | 1             | 0           | -1.634415               | -2.062152 | -0.134701 |
| 11            | 1             | 0           | -0.956742               | -1.099776 | -1.445578 |
| 12            | 1             | 0           | -2.113214               | -0.047829 | 1.184760  |

|    |   |   |           |          |           |
|----|---|---|-----------|----------|-----------|
| 13 | 1 | 0 | -2.741081 | 0.221649 | -0.426530 |
| 14 | 1 | 0 | -1.478034 | 2.275383 | 0.023629  |
| 15 | 1 | 0 | 0.965625  | 2.191549 | -0.152261 |

Zero-point correction= 0.127051 (Hartree/Particle)  
 Thermal correction to Gibbs Free Energy= 0.097155  
 Sum of electronic and zero-point Energies= -308.321814  
 SCF- Energy:M06 (PCM, toluene)/6-31G(d, p) = -308.4568858 (a.u.)

**H<sub>2</sub>:**

Standard orientation:

| Center Number | Atomic Number | Atomic Type | Coordinates (Angstroms) |          |           |
|---------------|---------------|-------------|-------------------------|----------|-----------|
|               |               |             | X                       | Y        | Z         |
| 1             | 1             | 0           | 0.000000                | 0.000000 | 0.370365  |
| 2             | 1             | 0           | 0.000000                | 0.000000 | -0.370365 |

Zero-point correction= 0.010096 (Hartree/Particle)  
 Thermal correction to Gibbs Free Energy= -0.001386  
 Sum of electronic and zero-point Energies= -1.159205  
 SCF- Energy:M06 (PCM, toluene)/6-31G(d, p) = -1.1693618 (a.u.)

**SiH<sub>4</sub>:**

Standard orientation:

| Center Number | Atomic Number | Atomic Type | Coordinates (Angstroms) |           |           |
|---------------|---------------|-------------|-------------------------|-----------|-----------|
|               |               |             | X                       | Y         | Z         |
| 1             | 14            | 0           | -0.000001               | -0.000031 | -0.000020 |
| 2             | 1             | 0           | 1.246582                | -0.454195 | -0.663438 |
| 3             | 1             | 0           | 0.096533                | -0.251268 | 1.458638  |
| 4             | 1             | 0           | -1.155911               | -0.745908 | -0.554777 |
| 5             | 1             | 0           | -0.187184               | 1.451810  | -0.240137 |

Zero-point correction= 0.031841 (Hartree/Particle)  
 Thermal correction to Gibbs Free Energy= 0.010285  
 Sum of electronic and zero-point Energies= -291.816037  
 SCF- Energy: M06 (PCM, toluene)/6-31G(d,p) = -291.8480121 (a.u.)

**1,4-COM1:**

Standard orientation:

| Center Number | Atomic Number | Atomic Type | Coordinates (Angstroms) |           |           |
|---------------|---------------|-------------|-------------------------|-----------|-----------|
|               |               |             | X                       | Y         | Z         |
| 1             | 6             | 0           | -3.630564               | -0.220060 | 0.416485  |
| 2             | 6             | 0           | -3.487446               | -1.432454 | -0.493722 |
| 3             | 6             | 0           | -3.679072               | -1.049736 | -1.955461 |
| 4             | 6             | 0           | -2.737884               | 0.054273  | -2.353166 |
| 5             | 6             | 0           | -2.341353               | 1.024074  | -1.396856 |
| 6             | 6             | 0           | -2.827976               | 0.990933  | -0.015171 |
| 7             | 8             | 0           | -2.630507               | 1.911667  | 0.769447  |
| 8             | 1             | 0           | -3.354779               | -0.442186 | 1.455680  |
| 9             | 1             | 0           | -4.680873               | 0.111177  | 0.439883  |
| 10            | 1             | 0           | -4.202471               | -2.210512 | -0.200033 |
| 11            | 1             | 0           | -2.487480               | -1.878807 | -0.365146 |
| 12            | 1             | 0           | -4.715910               | -0.702561 | -2.107477 |
| 13            | 1             | 0           | -3.537022               | -1.919588 | -2.607121 |
| 14            | 1             | 0           | -0.588738               | -1.525731 | -2.605152 |
| 15            | 1             | 0           | -1.994965               | 2.004027  | -1.731297 |
| 16            | 1             | 0           | -2.735412               | 0.337182  | -3.405787 |
| 17            | 29            | 0           | -0.933601               | -0.311501 | -1.734463 |
| 18            | 15            | 0           | 0.621026                | -0.037284 | -0.164600 |
| 19            | 6             | 0           | 1.338701                | 1.633414  | 0.000067  |
| 20            | 6             | 0           | 2.069264                | -1.134221 | -0.306524 |
| 21            | 6             | 0           | -0.097220               | -0.497002 | 1.448952  |
| 22            | 6             | 0           | -0.355560               | 0.408742  | 2.476942  |
| 23            | 6             | 0           | -0.991809               | -0.018926 | 3.639294  |

|    |   |   |           |           |           |
|----|---|---|-----------|-----------|-----------|
| 24 | 6 | 0 | -1.372980 | -1.348241 | 3.783416  |
| 25 | 6 | 0 | -1.117105 | -2.258712 | 2.759789  |
| 26 | 6 | 0 | -0.485332 | -1.836236 | 1.597800  |
| 27 | 6 | 0 | 0.475926  | 2.722521  | 0.190844  |
| 28 | 6 | 0 | 2.710765  | 1.862592  | -0.140254 |
| 29 | 6 | 0 | 3.215139  | 3.157854  | -0.079749 |
| 30 | 6 | 0 | 2.358681  | 4.233168  | 0.127252  |
| 31 | 6 | 0 | 0.991431  | 4.011183  | 0.265473  |
| 32 | 6 | 0 | 2.867628  | -1.448719 | 0.798421  |
| 33 | 6 | 0 | 4.008278  | -2.224786 | 0.635946  |
| 34 | 6 | 0 | 4.363988  | -2.683021 | -0.631190 |
| 35 | 6 | 0 | 3.575540  | -2.370765 | -1.733276 |
| 36 | 6 | 0 | 2.427700  | -1.600520 | -1.571776 |
| 37 | 1 | 0 | -0.064521 | 1.451571  | 2.373721  |
| 38 | 1 | 0 | -1.190453 | 0.695751  | 4.434164  |
| 39 | 1 | 0 | -1.870554 | -1.676965 | 4.692894  |
| 40 | 1 | 0 | -1.409695 | -3.300593 | 2.867857  |
| 41 | 1 | 0 | -0.279075 | -2.551085 | 0.799709  |
| 42 | 1 | 0 | -0.600375 | 2.570059  | 0.294583  |
| 43 | 1 | 0 | 3.390760  | 1.028362  | -0.301515 |
| 44 | 1 | 0 | 4.283932  | 3.323855  | -0.194475 |
| 45 | 1 | 0 | 2.755587  | 5.244615  | 0.177376  |
| 46 | 1 | 0 | 0.314892  | 4.847503  | 0.425374  |
| 47 | 1 | 0 | 2.589267  | -1.083440 | 1.786746  |
| 48 | 1 | 0 | 4.622810  | -2.472856 | 1.498363  |
| 49 | 1 | 0 | 5.257473  | -3.290603 | -0.756334 |
| 50 | 1 | 0 | 3.848333  | -2.734548 | -2.721063 |
| 51 | 1 | 0 | 1.779918  | -1.377295 | -2.419325 |

Zero-point correction= 0.410209 (Hartree/Particle)  
Thermal correction to Gibbs Free Energy= 0.355266  
Sum of electronic and zero-point Energies= -2984.614848  
SCF- Energy: M06 (PCM, toluene)/6-31G(d,p) = -2985.039832 (a.u.)

#### 1,4-TS1:

Standard orientation:

| Center<br>Number | Atomic<br>Number | Atomic<br>Type | Coordinates (Angstroms) |           |           |
|------------------|------------------|----------------|-------------------------|-----------|-----------|
|                  |                  |                | X                       | Y         | Z         |
| 1                | 6                | 0              | -4.052415               | 0.068246  | 0.625096  |
| 2                | 6                | 0              | -3.733745               | -1.372052 | 0.247758  |
| 3                | 6                | 0              | -3.892857               | -1.580742 | -1.250694 |
| 4                | 6                | 0              | -2.944129               | -0.677749 | -2.005734 |
| 5                | 6                | 0              | -2.831153               | 0.698194  | -1.517484 |
| 6                | 6                | 0              | -3.432617               | 1.129901  | -0.276436 |
| 7                | 8                | 0              | -3.475707               | 2.308100  | 0.079829  |
| 8                | 1                | 0              | -3.759080               | 0.301473  | 1.656211  |
| 9                | 1                | 0              | -5.139342               | 0.235760  | 0.579640  |
| 10               | 1                | 0              | -4.373113               | -2.065158 | 0.808802  |
| 11               | 1                | 0              | -2.696928               | -1.623997 | 0.531694  |
| 12               | 1                | 0              | -4.920365               | -1.315657 | -1.547998 |
| 13               | 1                | 0              | -3.732433               | -2.631118 | -1.524485 |
| 14               | 1                | 0              | -1.658303               | -1.646083 | -1.908345 |
| 15               | 1                | 0              | -2.647576               | 1.496598  | -2.237506 |
| 16               | 1                | 0              | -2.992320               | -0.771602 | -3.091750 |
| 17               | 29               | 0              | -1.172464               | -0.327692 | -1.233590 |
| 18               | 15               | 0              | 0.654300                | -0.012034 | -0.139113 |
| 19               | 6                | 0              | 0.870853                | 1.633591  | 0.608140  |
| 20               | 6                | 0              | 2.216053                | -0.291744 | -1.041401 |
| 21               | 6                | 0              | 0.685830                | -1.198480 | 1.247408  |
| 22               | 6                | 0              | 1.342469                | -0.958558 | 2.456294  |
| 23               | 6                | 0              | 1.363435                | -1.940154 | 3.440906  |
| 24               | 6                | 0              | 0.735917                | -3.164291 | 3.223873  |
| 25               | 6                | 0              | 0.078113                | -3.408226 | 2.022089  |
| 26               | 6                | 0              | 0.050881                | -2.426816 | 1.038538  |
| 27               | 6                | 0              | -0.267989               | 2.428257  | 0.753326  |
| 28               | 6                | 0              | 2.109641                | 2.103934  | 1.059568  |
| 29               | 6                | 0              | 2.198372                | 3.350457  | 1.666974  |

|    |   |   |           |           |           |
|----|---|---|-----------|-----------|-----------|
| 30 | 6 | 0 | 1.055216  | 4.133664  | 1.822657  |
| 31 | 6 | 0 | -0.174475 | 3.674759  | 1.364229  |
| 32 | 6 | 0 | 3.072608  | -1.357396 | -0.765484 |
| 33 | 6 | 0 | 4.225904  | -1.538061 | -1.524809 |
| 34 | 6 | 0 | 4.528240  | -0.659449 | -2.558606 |
| 35 | 6 | 0 | 3.675644  | 0.406623  | -2.837541 |
| 36 | 6 | 0 | 2.523975  | 0.589286  | -2.084375 |
| 37 | 1 | 0 | 1.824849  | 0.001822  | 2.631704  |
| 38 | 1 | 0 | 1.869921  | -1.748307 | 4.384015  |
| 39 | 1 | 0 | 0.755256  | -3.928002 | 3.997945  |
| 40 | 1 | 0 | -0.418613 | -4.360586 | 1.852621  |
| 41 | 1 | 0 | -0.470649 | -2.582692 | 0.092342  |
| 42 | 1 | 0 | -1.227687 | 2.088614  | 0.366434  |
| 43 | 1 | 0 | 3.005787  | 1.498469  | 0.922255  |
| 44 | 1 | 0 | 3.161627  | 3.716650  | 2.015178  |
| 45 | 1 | 0 | 1.130589  | 5.110771  | 2.294987  |
| 46 | 1 | 0 | -1.071866 | 4.280334  | 1.464633  |
| 47 | 1 | 0 | 2.840622  | -2.047998 | 0.043656  |
| 48 | 1 | 0 | 4.890812  | -2.369876 | -1.304013 |
| 49 | 1 | 0 | 5.429584  | -0.803707 | -3.149625 |
| 50 | 1 | 0 | 3.909787  | 1.096593  | -3.644805 |
| 51 | 1 | 0 | 1.859421  | 1.427322  | -2.297176 |

Zero-point correction= 0.409651 (Hartree/Particle)

Thermal correction to Gibbs Free Energy= 0.352548

Sum of electronic and zero-point Energies= -2984.593091

SCF- Energy: M06 (PCM, toluene)/6-31G(d,p) = -2985.018102 (a.u.)

#### 1,4-IM1:

Standard orientation:

| Center<br>Number | Atomic<br>Number | Atomic<br>Type | Coordinates (Angstroms) |           |           |
|------------------|------------------|----------------|-------------------------|-----------|-----------|
|                  |                  |                | X                       | Y         | Z         |
| 1                | 6                | 0              | 4.141484                | -1.025138 | 1.280517  |
| 2                | 6                | 0              | 4.798535                | 0.342108  | 1.408921  |
| 3                | 6                | 0              | 5.320534                | 0.797461  | 0.053595  |
| 4                | 6                | 0              | 4.166590                | 1.012029  | -0.920092 |
| 5                | 6                | 0              | 3.173266                | -0.130425 | -0.895595 |
| 6                | 6                | 0              | 3.205401                | -1.137935 | 0.101473  |
| 7                | 8                | 0              | 2.370478                | -2.120492 | 0.092243  |
| 8                | 1                | 0              | 3.588053                | -1.310421 | 2.184754  |
| 9                | 1                | 0              | 4.908509                | -1.802649 | 1.138771  |
| 10               | 1                | 0              | 5.602988                | 0.307747  | 2.154549  |
| 11               | 1                | 0              | 4.062824                | 1.076046  | 1.777679  |
| 12               | 1                | 0              | 5.996124                | 0.022472  | -0.342354 |
| 13               | 1                | 0              | 5.913777                | 1.716285  | 0.147985  |
| 14               | 1                | 0              | 3.676202                | 1.968541  | -0.674668 |
| 15               | 1                | 0              | 2.808960                | -0.476331 | -1.869573 |
| 16               | 1                | 0              | 4.563761                | 1.139440  | -1.936963 |
| 17               | 29               | 0              | 1.349955                | -0.324486 | -0.036344 |
| 18               | 15               | 0              | -0.729028               | 0.051918  | 0.030301  |
| 19               | 6                | 0              | -1.184329               | 1.744003  | -0.476967 |
| 20               | 6                | 0              | -2.456985               | 2.298329  | -0.309786 |
| 21               | 6                | 0              | -0.182416               | 2.492751  | -1.097455 |
| 22               | 6                | 0              | -2.723203               | 3.579850  | -0.777758 |
| 23               | 1                | 0              | -3.234429               | 1.735017  | 0.206266  |
| 24               | 6                | 0              | -0.451502               | 3.772288  | -1.569856 |
| 25               | 1                | 0              | 0.808811                | 2.041658  | -1.178397 |
| 26               | 6                | 0              | -1.723087               | 4.313713  | -1.412340 |
| 27               | 1                | 0              | -3.712690               | 4.011266  | -0.643872 |
| 28               | 1                | 0              | 0.333849                | 4.349112  | -2.052384 |
| 29               | 1                | 0              | -1.935499               | 5.316787  | -1.775417 |
| 30               | 6                | 0              | -1.656940               | -0.222303 | 1.575824  |
| 31               | 6                | 0              | -2.359206               | -1.406289 | 1.806979  |
| 32               | 6                | 0              | -1.574936               | 0.738942  | 2.588708  |
| 33               | 6                | 0              | -2.983835               | -1.618201 | 3.032217  |
| 34               | 1                | 0              | -2.418526               | -2.164215 | 1.027624  |
| 35               | 6                | 0              | -2.203460               | 0.525239  | 3.808588  |

|    |   |   |           |           |           |
|----|---|---|-----------|-----------|-----------|
| 36 | 1 | 0 | -1.020911 | 1.661195  | 2.413650  |
| 37 | 6 | 0 | -2.909832 | -0.654379 | 4.031637  |
| 38 | 1 | 0 | -3.531093 | -2.541991 | 3.205109  |
| 39 | 1 | 0 | -2.139434 | 1.279502  | 4.589471  |
| 40 | 1 | 0 | -3.399646 | -0.822211 | 4.988033  |
| 41 | 6 | 0 | -1.482429 | -1.077043 | -1.187526 |
| 42 | 6 | 0 | -0.704357 | -2.177658 | -1.559082 |
| 43 | 6 | 0 | -2.766523 | -0.920088 | -1.714520 |
| 44 | 6 | 0 | -1.214984 | -3.119919 | -2.445971 |
| 45 | 1 | 0 | 0.300993  | -2.277863 | -1.143430 |
| 46 | 6 | 0 | -3.268869 | -1.860592 | -2.604709 |
| 47 | 1 | 0 | -3.371184 | -0.058012 | -1.435666 |
| 48 | 6 | 0 | -2.494149 | -2.961375 | -2.967591 |
| 49 | 1 | 0 | -0.608373 | -3.975889 | -2.731481 |
| 50 | 1 | 0 | -4.267006 | -1.736708 | -3.018745 |
| 51 | 1 | 0 | -2.891746 | -3.695745 | -3.664684 |

Zero-point correction= 0.41442 (Hartree/Particle)

Thermal correction to Gibbs Free Energy=0.356358

Sum of electronic and zero-point Energies= -2984.618988

SCF- Energy: M06 (PCM, toluene)/6-31G(d,p)=-2985.045593 (a.u.)

#### 1,4-COM2-H<sub>2</sub>:

Standard orientation:

| Center Number | Atomic Number | Atomic Type | Coordinates (Angstroms) |           |           |
|---------------|---------------|-------------|-------------------------|-----------|-----------|
|               |               |             | X                       | Y         | Z         |
| 1             | 6             | 0           | 4.057270                | -0.623322 | 0.870425  |
| 2             | 6             | 0           | 4.846034                | 0.675629  | 0.970676  |
| 3             | 6             | 0           | 5.344424                | 1.097695  | -0.404207 |
| 4             | 6             | 0           | 4.165024                | 1.422457  | -1.313637 |
| 5             | 6             | 0           | 3.119854                | 0.324191  | -1.302432 |
| 6             | 6             | 0           | 3.122592                | -0.700628 | -0.314379 |
| 7             | 8             | 0           | 2.297762                | -1.678754 | -0.354306 |
| 8             | 1             | 0           | 3.477432                | -0.829032 | 1.781802  |
| 9             | 1             | 0           | 4.741433                | -1.478280 | 0.755414  |
| 10            | 1             | 0           | 5.676863                | 0.557424  | 1.677918  |
| 11            | 1             | 0           | 4.203129                | 1.472827  | 1.376622  |
| 12            | 1             | 0           | 5.931634                | 0.274145  | -0.841168 |
| 13            | 1             | 0           | 6.016789                | 1.962044  | -0.327689 |
| 14            | 1             | 0           | 3.738911                | 2.387162  | -0.996619 |
| 15            | 1             | 0           | 2.769336                | -0.018426 | -2.282862 |
| 16            | 1             | 0           | 4.521806                | 1.582741  | -2.340140 |
| 17            | 29            | 0           | 1.303456                | 0.262789  | -0.473145 |
| 18            | 15            | 0           | -0.781961               | 0.119430  | -0.043813 |
| 19            | 6             | 0           | -1.554056               | -1.052523 | -1.205076 |
| 20            | 6             | 0           | -2.935394               | -1.216655 | -1.342467 |
| 21            | 6             | 0           | -0.677775               | -1.881567 | -1.910443 |
| 22            | 6             | 0           | -3.433748               | -2.188144 | -2.201151 |
| 23            | 1             | 0           | -3.621893               | -0.582951 | -0.781606 |
| 24            | 6             | 0           | -1.183458               | -2.859422 | -2.760988 |
| 25            | 1             | 0           | 0.397370                | -1.766566 | -1.757748 |
| 26            | 6             | 0           | -2.557672               | -3.007627 | -2.911112 |
| 27            | 1             | 0           | -4.508393               | -2.312098 | -2.314026 |
| 28            | 1             | 0           | -0.499926               | -3.505269 | -3.306663 |
| 29            | 1             | 0           | -2.952406               | -3.768099 | -3.581262 |
| 30            | 6             | 0           | -1.752188               | 1.657056  | -0.106215 |
| 31            | 6             | 0           | -1.709503               | 2.534888  | 0.982763  |
| 32            | 6             | 0           | -2.397336               | 2.055180  | -1.279673 |
| 33            | 6             | 0           | -2.329600               | 3.775805  | 0.907159  |
| 34            | 1             | 0           | -1.188146               | 2.239799  | 1.892781  |
| 35            | 6             | 0           | -3.013555               | 3.299851  | -1.352605 |
| 36            | 1             | 0           | -2.415980               | 1.389945  | -2.141316 |
| 37            | 6             | 0           | -2.985533               | 4.159371  | -0.259328 |
| 38            | 1             | 0           | -2.297810               | 4.447907  | 1.761551  |
| 39            | 1             | 0           | -3.517217               | 3.598897  | -2.268925 |
| 40            | 1             | 0           | -3.469099               | 5.131656  | -0.317871 |
| 41            | 6             | 0           | -1.099709               | -0.622685 | 1.595122  |



|    |   |   |           |           |          |
|----|---|---|-----------|-----------|----------|
| 42 | 6 | 0 | -0.136591 | -1.519214 | 2.070933 |
| 43 | 6 | 0 | -2.267650 | -0.406169 | 2.330545 |
| 44 | 6 | 0 | -0.341412 | -2.181762 | 3.276079 |
| 45 | 1 | 0 | 0.769737  | -1.705270 | 1.487402 |
| 46 | 6 | 0 | -2.461636 | -1.064633 | 3.539806 |
| 47 | 1 | 0 | -3.023663 | 0.286398  | 1.962672 |
| 48 | 6 | 0 | -1.498619 | -1.951132 | 4.013375 |
| 49 | 1 | 0 | 0.409066  | -2.878738 | 3.641601 |
| 50 | 1 | 0 | -3.369088 | -0.886579 | 4.112475 |
| 51 | 1 | 0 | -1.652383 | -2.464098 | 4.960202 |
| 52 | 1 | 0 | 1.690263  | 1.199293  | 1.483528 |
| 53 | 1 | 0 | 1.800751  | 1.323023  | 2.217764 |

Zero-point correction= 0.431359 (Hartree/Particle)

Thermal correction to Gibbs Free Energy= 0.373133

Sum of electronic and zero-point Energies=-2985.780216

SCF- Energy: M06 (PCM, toluene)/6-31G(d,p) = -2986.222689 (a.u.)

#### 1,4-COM2-SiH<sub>4</sub>:

Standard orientation:

| Center Number | Atomic Number | Atomic Type | Coordinates (Angstroms) |           |           |
|---------------|---------------|-------------|-------------------------|-----------|-----------|
|               |               |             | X                       | Y         | Z         |
| 1             | 6             | 0           | -4.249123               | 0.429088  | -0.918498 |
| 2             | 6             | 0           | -4.998226               | 0.382627  | 0.406634  |
| 3             | 6             | 0           | -5.205932               | -1.063161 | 0.834775  |
| 4             | 6             | 0           | -3.864681               | -1.732247 | 1.113688  |
| 5             | 6             | 0           | -2.851835               | -1.475529 | 0.017028  |
| 6             | 6             | 0           | -3.056876               | -0.498958 | -0.985438 |
| 7             | 8             | 0           | -2.212347               | -0.314602 | -1.943294 |
| 8             | 1             | 0           | -3.918743               | 1.445454  | -1.180621 |
| 9             | 1             | 0           | -4.915735               | 0.121138  | -1.739179 |
| 10            | 1             | 0           | -5.954473               | 0.914611  | 0.320380  |
| 11            | 1             | 0           | -4.417788               | 0.907639  | 1.183405  |
| 12            | 1             | 0           | -5.724888               | -1.600011 | 0.024637  |
| 13            | 1             | 0           | -5.853108               | -1.121151 | 1.719665  |
| 14            | 1             | 0           | -3.494189               | -1.376923 | 2.088343  |
| 15            | 1             | 0           | -2.246693               | -2.333247 | -0.289530 |
| 16            | 1             | 0           | -4.012371               | -2.814396 | 1.235642  |
| 17            | 29            | 0           | -1.271068               | -0.157499 | -0.059855 |
| 18            | 15            | 0           | 0.869783                | -0.145957 | 0.073476  |
| 19            | 6             | 0           | 1.620351                | -1.249424 | -1.165637 |
| 20            | 6             | 0           | 3.005046                | -1.417458 | -1.280081 |
| 21            | 6             | 0           | 0.764791                | -1.873620 | -2.076060 |
| 22            | 6             | 0           | 3.525606                | -2.233414 | -2.275407 |
| 23            | 1             | 0           | 3.674058                | -0.900933 | -0.591398 |
| 24            | 6             | 0           | 1.293579                | -2.684045 | -3.077342 |
| 25            | 1             | 0           | -0.309302               | -1.686206 | -2.013351 |
| 26            | 6             | 0           | 2.667719                | -2.870026 | -3.171642 |
| 27            | 1             | 0           | 4.601586                | -2.366819 | -2.361377 |
| 28            | 1             | 0           | 0.626042                | -3.164481 | -3.788557 |
| 29            | 1             | 0           | 3.077756                | -3.505643 | -3.953463 |
| 30            | 6             | 0           | 1.548946                | -0.615625 | 1.698908  |
| 31            | 6             | 0           | 1.213192                | 0.196528  | 2.790191  |
| 32            | 6             | 0           | 2.276535                | -1.785085 | 1.921549  |
| 33            | 6             | 0           | 1.622944                | -0.140405 | 4.072648  |
| 34            | 1             | 0           | 0.625853                | 1.101424  | 2.627186  |
| 35            | 6             | 0           | 2.676568                | -2.126814 | 3.210959  |
| 36            | 1             | 0           | 2.526944                | -2.435674 | 1.086086  |
| 37            | 6             | 0           | 2.356650                | -1.305696 | 4.285312  |
| 38            | 1             | 0           | 1.361547                | 0.501257  | 4.910846  |
| 39            | 1             | 0           | 3.240474                | -3.042431 | 3.373776  |
| 40            | 1             | 0           | 2.671119                | -1.575029 | 5.290835  |
| 41            | 6             | 0           | 1.646845                | 1.463684  | -0.324448 |
| 42            | 6             | 0           | 1.226762                | 2.066213  | -1.516705 |
| 43            | 6             | 0           | 2.597580                | 2.104986  | 0.469376  |
| 44            | 6             | 0           | 1.741369                | 3.298212  | -1.899272 |
| 45            | 1             | 0           | 0.481785                | 1.567564  | -2.140715 |

|    |    |   |           |          |           |
|----|----|---|-----------|----------|-----------|
| 46 | 6  | 0 | 3.107216  | 3.342706 | 0.085107  |
| 47 | 1  | 0 | 2.939467  | 1.640995 | 1.393184  |
| 48 | 6  | 0 | 2.678724  | 3.941595 | -1.094036 |
| 49 | 1  | 0 | 1.406585  | 3.759447 | -2.825489 |
| 50 | 1  | 0 | 3.844390  | 3.839579 | 0.711901  |
| 51 | 1  | 0 | 3.076026  | 4.910116 | -1.388858 |
| 52 | 1  | 0 | -1.740904 | 1.417243 | 0.735288  |
| 53 | 14 | 0 | -1.769204 | 2.868947 | 0.314707  |
| 54 | 1  | 0 | -0.556668 | 3.517649 | 0.872491  |
| 55 | 1  | 0 | -2.992987 | 3.470025 | 0.901543  |
| 56 | 1  | 0 | -1.796427 | 2.992387 | -1.158218 |

Zero-point correction= 0.448070 (Hartree/Particle)

Thermal correction to Gibbs Free Energy= 0.386091

Sum of electronic and zero-point Energies= -3276.451325

SCF- Energy: M06 (PCM, toluene)/6-31G(d,p) = -3276.911608 (a.u.)

#### 1,4-TS2-H<sub>2</sub>:

Standard orientation:

| Center Number | Atomic Number | Atomic Type | Coordinates (Angstroms) |           |           |
|---------------|---------------|-------------|-------------------------|-----------|-----------|
|               |               |             | X                       | Y         | Z         |
| 1             | 6             | 0           | 3.247243                | -1.613217 | -0.241601 |
| 2             | 6             | 0           | 3.500128                | -0.701685 | 0.951422  |
| 3             | 6             | 0           | 4.247728                | 0.549432  | 0.511947  |
| 4             | 6             | 0           | 3.381711                | 1.355752  | -0.447546 |
| 5             | 6             | 0           | 2.842201                | 0.507029  | -1.584270 |
| 6             | 6             | 0           | 2.863596                | -0.889873 | -1.504425 |
| 7             | 8             | 0           | 2.539776                | -1.659026 | -2.508981 |
| 8             | 1             | 0           | 2.470990                | -2.362410 | -0.028289 |
| 9             | 1             | 0           | 4.152160                | -2.189153 | -0.490901 |
| 10            | 1             | 0           | 4.047169                | -1.245505 | 1.732348  |
| 11            | 1             | 0           | 2.539747                | -0.400979 | 1.398726  |
| 12            | 1             | 0           | 5.181750                | 0.257991  | 0.005760  |
| 13            | 1             | 0           | 4.530083                | 1.160508  | 1.379067  |
| 14            | 1             | 0           | 2.566739                | 1.821046  | 0.134805  |
| 15            | 1             | 0           | 2.948132                | 0.917848  | -2.589646 |
| 16            | 1             | 0           | 3.957901                | 2.192428  | -0.865011 |
| 17            | 29            | 0           | 0.844517                | -0.030382 | -1.660024 |
| 18            | 15            | 0           | -0.699337               | -0.018397 | -0.160581 |
| 19            | 6             | 0           | -1.176661               | 1.730109  | 0.057428  |
| 20            | 6             | 0           | -2.334319               | 2.159465  | 0.709215  |
| 21            | 6             | 0           | -0.284286               | 2.671865  | -0.460809 |
| 22            | 6             | 0           | -2.585036               | 3.519488  | 0.849146  |
| 23            | 1             | 0           | -3.042577               | 1.429861  | 1.100757  |
| 24            | 6             | 0           | -0.533386               | 4.031778  | -0.316794 |
| 25            | 1             | 0           | 0.601720                | 2.300359  | -0.979380 |
| 26            | 6             | 0           | -1.684543               | 4.453681  | 0.340278  |
| 27            | 1             | 0           | -3.487372               | 3.854732  | 1.355399  |
| 28            | 1             | 0           | 0.166216                | 4.758728  | -0.722009 |
| 29            | 1             | 0           | -1.886420               | 5.516500  | 0.452882  |
| 30            | 6             | 0           | -0.197286               | -0.565338 | 1.508683  |
| 31            | 6             | 0           | 0.030675                | -1.931508 | 1.712758  |
| 32            | 6             | 0           | 0.081011                | 0.335450  | 2.538028  |
| 33            | 6             | 0           | 0.520911                | -2.386934 | 2.929522  |
| 34            | 1             | 0           | -0.175401               | -2.639825 | 0.909257  |
| 35            | 6             | 0           | 0.573401                | -0.124623 | 3.756550  |
| 36            | 1             | 0           | -0.081183               | 1.401399  | 2.384626  |
| 37            | 6             | 0           | 0.793972                | -1.483013 | 3.954354  |
| 38            | 1             | 0           | 0.693247                | -3.450290 | 3.079257  |
| 39            | 1             | 0           | 0.785553                | 0.584334  | 4.553593  |
| 40            | 1             | 0           | 1.180534                | -1.840269 | 4.905973  |
| 41            | 6             | 0           | -2.255278               | -0.922538 | -0.462804 |
| 42            | 6             | 0           | -2.566994               | -1.223360 | -1.790572 |
| 43            | 6             | 0           | -3.144922               | -1.288069 | 0.552761  |
| 44            | 6             | 0           | -3.759466               | -1.866753 | -2.103473 |
| 45            | 1             | 0           | -1.849635               | -0.963769 | -2.569864 |

|    |   |   |           |           |           |
|----|---|---|-----------|-----------|-----------|
| 46 | 6 | 0 | -4.333654 | -1.936275 | 0.238787  |
| 47 | 1 | 0 | -2.896197 | -1.080075 | 1.593186  |
| 48 | 6 | 0 | -4.642769 | -2.221746 | -1.088981 |
| 49 | 1 | 0 | -3.993164 | -2.100739 | -3.139328 |
| 50 | 1 | 0 | -5.020121 | -2.223429 | 1.032086  |
| 51 | 1 | 0 | -5.572109 | -2.732226 | -1.331468 |
| 52 | 1 | 0 | 0.778521  | -0.462391 | -3.280994 |
| 53 | 1 | 0 | 1.580688  | -1.030127 | -3.057186 |

Zero-point correction= 0.428437 (Hartree/Particle)

Thermal correction to Gibbs Free Energy= 0.371449

Sum of electronic and zero-point Energies=-2985.766534

SCF- Energy: M06 (PCM, toluene)/6-31G(d,p) = -2986.206638 (a.u.)

#### 1,4-TS2-SiH<sub>4</sub>:

Standard orientation:

| Center Number | Atomic Number | Atomic Type | Coordinates (Angstroms) |           |           |
|---------------|---------------|-------------|-------------------------|-----------|-----------|
|               |               |             | X                       | Y         | Z         |
| 1             | 14            | 0           | -2.340884               | 3.094334  | -0.290165 |
| 2             | 1             | 0           | -1.159713               | 4.005815  | 0.066856  |
| 3             | 1             | 0           | -3.416085               | 4.101238  | -0.075092 |
| 4             | 1             | 0           | -1.880054               | 2.787789  | -1.684394 |
| 5             | 6             | 0           | -4.021273               | -0.105364 | 0.972331  |
| 6             | 6             | 0           | -3.546147               | -1.541487 | 1.139741  |
| 7             | 6             | 0           | -3.673274               | -2.275861 | -0.187511 |
| 8             | 6             | 0           | -2.754239               | -1.664226 | -1.240024 |
| 9             | 6             | 0           | -2.760513               | -0.146499 | -1.206305 |
| 10            | 6             | 0           | -3.506531               | 0.568167  | -0.273273 |
| 11            | 8             | 0           | -3.798095               | 1.832801  | -0.382444 |
| 12            | 1             | 0           | -3.746812               | 0.528789  | 1.828103  |
| 13            | 1             | 0           | -5.120028               | -0.061016 | 0.916766  |
| 14            | 1             | 0           | -4.120602               | -2.044128 | 1.927744  |
| 15            | 1             | 0           | -2.493172               | -1.554745 | 1.471519  |
| 16            | 1             | 0           | -4.717461               | -2.195898 | -0.528078 |
| 17            | 1             | 0           | -3.460461               | -3.346376 | -0.074032 |
| 18            | 1             | 0           | -1.733409               | -2.061610 | -1.115441 |
| 19            | 1             | 0           | -2.630128               | 0.362994  | -2.166328 |
| 20            | 1             | 0           | -3.070276               | -1.996649 | -2.239160 |
| 21            | 1             | 0           | -1.736379               | 2.032927  | 0.731404  |
| 22            | 29            | 0           | -1.215775               | 0.666094  | -0.163926 |
| 23            | 15            | 0           | 0.837592                | -0.007581 | -0.010652 |
| 24            | 6             | 0           | 2.067560                | 1.328788  | -0.132115 |
| 25            | 6             | 0           | 1.590106                | 2.636436  | -0.026886 |
| 26            | 6             | 0           | 3.436121                | 1.101208  | -0.305483 |
| 27            | 6             | 0           | 2.472053                | 3.710588  | -0.088909 |
| 28            | 1             | 0           | 0.521081                | 2.815418  | 0.098731  |
| 29            | 6             | 0           | 4.313874                | 2.175624  | -0.369184 |
| 30            | 1             | 0           | 3.813147                | 0.083384  | -0.399839 |
| 31            | 6             | 0           | 3.831976                | 3.479695  | -0.260384 |
| 32            | 1             | 0           | 2.084975                | 4.723769  | -0.010141 |
| 33            | 1             | 0           | 5.377995                | 1.998338  | -0.507680 |
| 34            | 1             | 0           | 4.523466                | 4.317496  | -0.315117 |
| 35            | 6             | 0           | 1.372880                | -1.247467 | -1.237088 |
| 36            | 6             | 0           | 2.360167                | -2.204579 | -0.984918 |
| 37            | 6             | 0           | 0.785665                | -1.187639 | -2.504028 |
| 38            | 6             | 0           | 2.755752                | -3.082549 | -1.988028 |
| 39            | 1             | 0           | 2.810479                | -2.272833 | 0.005011  |
| 40            | 6             | 0           | 1.185838                | -2.062385 | -3.507608 |
| 41            | 1             | 0           | -0.003854               | -0.458265 | -2.690794 |
| 42            | 6             | 0           | 2.171593                | -3.009858 | -3.249663 |
| 43            | 1             | 0           | 3.521441                | -3.827530 | -1.784213 |
| 44            | 1             | 0           | 0.722028                | -2.008743 | -4.489558 |
| 45            | 1             | 0           | 2.481095                | -3.699095 | -4.031849 |
| 46            | 6             | 0           | 1.130409                | -0.802853 | 1.603978  |
| 47            | 6             | 0           | 0.551726                | -2.054451 | 1.849640  |
| 48            | 6             | 0           | 1.805012                | -0.145785 | 2.634006  |
| 49            | 6             | 0           | 0.664993                | -2.644275 | 3.101666  |

|    |   |   |          |           |          |
|----|---|---|----------|-----------|----------|
| 50 | 1 | 0 | 0.018827 | -2.571960 | 1.050838 |
| 51 | 6 | 0 | 1.910363 | -0.737944 | 3.889319 |
| 52 | 1 | 0 | 2.249961 | 0.831868  | 2.455462 |
| 53 | 6 | 0 | 1.343884 | -1.985749 | 4.124281 |
| 54 | 1 | 0 | 0.219290 | -3.619866 | 3.281527 |
| 55 | 1 | 0 | 2.438871 | -0.220051 | 4.686227 |
| 56 | 1 | 0 | 1.428540 | -2.446377 | 5.105702 |

Zero-point correction= 0.449181 (Hartree/Particle)

Thermal correction to Gibbs Free Energy= 0.389221

Sum of electronic and zero-point Energies= -3276.437405

SCF- Energy: M06 (PCM, toluene)/6-31G(d,p) = -3276.899351 (a.u.)

#### 1,4-COM3-H<sub>2</sub>:

Standard orientation:

| Center<br>Number | Atomic<br>Number | Atomic<br>Type | Coordinates (Angstroms) |           |           |
|------------------|------------------|----------------|-------------------------|-----------|-----------|
|                  |                  |                | X                       | Y         | Z         |
| 1                | 6                | 0              | 2.949508                | -0.637001 | 0.829495  |
| 2                | 6                | 0              | 3.400531                | 0.812567  | 0.739906  |
| 3                | 6                | 0              | 4.453624                | 0.953338  | -0.351289 |
| 4                | 6                | 0              | 3.897046                | 0.601274  | -1.729255 |
| 5                | 6                | 0              | 3.002153                | -0.626281 | -1.704172 |
| 6                | 6                | 0              | 2.518278                | -1.153385 | -0.507128 |
| 7                | 8                | 0              | 2.066825                | -2.460603 | -0.430047 |
| 8                | 1                | 0              | 2.155306                | -0.775135 | 1.572259  |
| 9                | 1                | 0              | 3.793119                | -1.264789 | 1.163472  |
| 10               | 1                | 0              | 3.792806                | 1.143245  | 1.709432  |
| 11               | 1                | 0              | 2.535223                | 1.462435  | 0.516823  |
| 12               | 1                | 0              | 5.284924                | 0.272718  | -0.109914 |
| 13               | 1                | 0              | 4.874027                | 1.966609  | -0.367161 |
| 14               | 1                | 0              | 3.358895                | 1.466771  | -2.145241 |
| 15               | 1                | 0              | 3.051981                | -1.282246 | -2.575823 |
| 16               | 1                | 0              | 4.727137                | 0.416567  | -2.424150 |
| 17               | 29               | 0              | 1.115422                | -0.081409 | -1.487634 |
| 18               | 15               | 0              | -0.596974               | 0.069005  | -0.096532 |
| 19               | 6                | 0              | -1.245328               | 1.773998  | -0.008467 |
| 20               | 6                | 0              | -2.365527               | 2.128022  | 0.749611  |
| 21               | 6                | 0              | -0.580365               | 2.752095  | -0.750028 |
| 22               | 6                | 0              | -2.805651               | 3.445222  | 0.770852  |
| 23               | 1                | 0              | -2.889889               | 1.370165  | 1.330769  |
| 24               | 6                | 0              | -1.020099               | 4.071909  | -0.726019 |
| 25               | 1                | 0              | 0.266123                | 2.452088  | -1.369753 |
| 26               | 6                | 0              | -2.131407               | 4.417763  | 0.034336  |
| 27               | 1                | 0              | -3.677875               | 3.716370  | 1.361504  |
| 28               | 1                | 0              | -0.496970               | 4.827532  | -1.307183 |
| 29               | 1                | 0              | -2.479156               | 5.448294  | 0.051770  |
| 30               | 6                | 0              | -0.399742               | -0.436034 | 1.643880  |
| 31               | 6                | 0              | -0.295701               | -1.803896 | 1.925284  |
| 32               | 6                | 0              | -0.151170               | 0.487633  | 2.662676  |
| 33               | 6                | 0              | 0.023227                | -2.236718 | 3.205578  |
| 34               | 1                | 0              | -0.446721               | -2.529807 | 1.127693  |
| 35               | 6                | 0              | 0.174325                | 0.050446  | 3.943547  |
| 36               | 1                | 0              | -0.209149               | 1.554819  | 2.453566  |
| 37               | 6                | 0              | 0.258495                | -1.310196 | 4.218922  |
| 38               | 1                | 0              | 0.098315                | -3.301889 | 3.411871  |
| 39               | 1                | 0              | 0.361483                | 0.779021  | 4.729364  |
| 40               | 1                | 0              | 0.512790                | -1.649349 | 5.220472  |
| 41               | 6                | 0              | -1.974571               | -0.971167 | -0.697816 |
| 42               | 6                | 0              | -1.972999               | -1.295012 | -2.057593 |
| 43               | 6                | 0              | -3.021120               | -1.416126 | 0.116086  |
| 44               | 6                | 0              | -3.006732               | -2.053233 | -2.597230 |
| 45               | 1                | 0              | -1.144268               | -0.938582 | -2.672145 |
| 46               | 6                | 0              | -4.051286               | -2.174346 | -0.426567 |
| 47               | 1                | 0              | -3.018337               | -1.186339 | 1.180857  |
| 48               | 6                | 0              | -4.046112               | -2.491009 | -1.783282 |
| 49               | 1                | 0              | -2.997550               | -2.303689 | -3.655485 |
| 50               | 1                | 0              | -4.861988               | -2.520822 | 0.210634  |

|    |   |   |           |           |           |
|----|---|---|-----------|-----------|-----------|
| 51 | 1 | 0 | -4.854446 | -3.085049 | -2.204137 |
| 52 | 1 | 0 | 0.625011  | 0.467834  | -2.868697 |
| 53 | 1 | 0 | 2.055739  | -2.835343 | -1.319013 |

Zero-point correction= 0.433436 (Hartree/Particle)

Thermal correction to Gibbs Free Energy= 0.376346

Sum of electronic and zero-point Energies=-2985.77909

SCF- Energy: M06 (PCM, toluene)/6-31G(d,p) = -2986.228344 (a.u.)

#### 1,4-COM3-SiH<sub>4</sub>:

Standard orientation:

| Center Number | Atomic Number | Atomic Type | Coordinates (Angstroms) |           |           |
|---------------|---------------|-------------|-------------------------|-----------|-----------|
|               |               |             | X                       | Y         | Z         |
| 1             | 14            | 0           | 3.479697                | 2.764208  | -0.216909 |
| 2             | 1             | 0           | 3.911151                | 2.630201  | -1.626799 |
| 3             | 1             | 0           | 4.395622                | 3.679592  | 0.505291  |
| 4             | 1             | 0           | 2.100167                | 3.312717  | -0.151243 |
| 5             | 6             | 0           | 4.065607                | -0.546570 | -0.836731 |
| 6             | 6             | 0           | 3.596913                | -1.947969 | -1.204014 |
| 7             | 6             | 0           | 3.256204                | -2.730386 | 0.056744  |
| 8             | 6             | 0           | 2.077859                | -2.098606 | 0.791756  |
| 9             | 6             | 0           | 2.235218                | -0.594847 | 0.931919  |
| 10            | 6             | 0           | 3.134006                | 0.119264  | 0.136064  |
| 11            | 8             | 0           | 3.596277                | 1.330004  | 0.625857  |
| 12            | 1             | 0           | 4.192608                | 0.078125  | -1.729972 |
| 13            | 1             | 0           | 5.050623                | -0.603429 | -0.342675 |
| 14            | 1             | 0           | 4.374124                | -2.458303 | -1.785877 |
| 15            | 1             | 0           | 2.709199                | -1.887772 | -1.856703 |
| 16            | 1             | 0           | 4.137495                | -2.732855 | 0.716904  |
| 17            | 1             | 0           | 3.034037                | -3.779083 | -0.178176 |
| 18            | 1             | 0           | 1.145531                | -2.365569 | 0.263086  |
| 19            | 1             | 0           | 1.970941                | -0.139972 | 1.887949  |
| 20            | 1             | 0           | 1.971532                | -2.540056 | 1.792639  |
| 21            | 1             | 0           | 1.472507                | 1.055013  | -1.904542 |
| 22            | 29            | 0           | 1.278310                | 0.334253  | -0.541842 |
| 23            | 15            | 0           | -0.875208               | 0.063201  | -0.050495 |
| 24            | 6             | 0           | -1.705007               | 1.655884  | 0.267984  |
| 25            | 6             | 0           | -1.163877               | 2.774655  | -0.373510 |
| 26            | 6             | 0           | -2.842816               | 1.801435  | 1.066940  |
| 27            | 6             | 0           | -1.759127               | 4.022306  | -0.223590 |
| 28            | 1             | 0           | -0.268715               | 2.647366  | -0.984781 |
| 29            | 6             | 0           | -3.433457               | 3.050891  | 1.215845  |
| 30            | 1             | 0           | -3.257055               | 0.938907  | 1.587982  |
| 31            | 6             | 0           | -2.893840               | 4.160239  | 0.569277  |
| 32            | 1             | 0           | -1.331195               | 4.888445  | -0.722794 |
| 33            | 1             | 0           | -4.317263               | 3.160332  | 1.840286  |
| 34            | 1             | 0           | -3.357588               | 5.136793  | 0.689907  |
| 35            | 6             | 0           | -1.243804               | -0.965226 | 1.409085  |
| 36            | 6             | 0           | -1.643839               | -2.298766 | 1.295905  |
| 37            | 6             | 0           | -0.930829               | -0.455713 | 2.676079  |
| 38            | 6             | 0           | -1.739979               | -3.103048 | 2.428273  |
| 39            | 1             | 0           | -1.878063               | -2.713550 | 0.316766  |
| 40            | 6             | 0           | -1.034343               | -1.257944 | 3.804695  |
| 41            | 1             | 0           | -0.601130               | 0.579017  | 2.774292  |
| 42            | 6             | 0           | -1.437721               | -2.586016 | 3.682757  |
| 43            | 1             | 0           | -2.053385               | -4.139698 | 2.327100  |
| 44            | 1             | 0           | -0.794963               | -0.847530 | 4.783075  |
| 45            | 1             | 0           | -1.512671               | -3.216002 | 4.565956  |
| 46            | 6             | 0           | -1.804844               | -0.713927 | -1.415586 |
| 47            | 6             | 0           | -1.082449               | -1.074106 | -2.554783 |
| 48            | 6             | 0           | -3.183673               | -0.943394 | -1.371462 |
| 49            | 6             | 0           | -1.726730               | -1.674854 | -3.632476 |
| 50            | 1             | 0           | -0.016683               | -0.842503 | -2.590933 |
| 51            | 6             | 0           | -3.825726               | -1.538921 | -2.449077 |
| 52            | 1             | 0           | -3.754660               | -0.658965 | -0.487985 |
| 53            | 6             | 0           | -3.095913               | -1.907654 | -3.578495 |
| 54            | 1             | 0           | -1.157907               | -1.952232 | -4.516741 |

|    |   |   |           |           |           |
|----|---|---|-----------|-----------|-----------|
| 55 | 1 | 0 | -4.898307 | -1.715340 | -2.411990 |
| 56 | 1 | 0 | -3.601809 | -2.374296 | -4.420879 |

Zero-point correction= 0.448577 (Hartree/Particle)  
Thermal correction to Gibbs Free Energy= 0.387074  
Sum of electronic and zero-point Energies= -3276.465951  
SCF- Energy: M06 (PCM, toluene)/6-31G(d,p) = -3276.925719 (a.u.)

#### 14-Pro-H<sub>2</sub>:

Standard orientation:

| Center Number | Atomic Number | Atomic Type | Coordinates (Angstroms) |           |           |
|---------------|---------------|-------------|-------------------------|-----------|-----------|
|               |               |             | X                       | Y         | Z         |
| 1             | 6             | 0           | -0.416420               | 1.241752  | 0.069806  |
| 2             | 6             | 0           | 1.059483                | 1.233468  | -0.312449 |
| 3             | 6             | 0           | 1.774870                | 0.073135  | 0.365815  |
| 4             | 6             | 0           | 1.200394                | -1.257226 | -0.109062 |
| 5             | 6             | 0           | -0.298968               | -1.250627 | -0.102079 |
| 6             | 6             | 0           | -1.016420               | -0.128886 | 0.000102  |
| 7             | 1             | 0           | -0.978454               | 1.916475  | -0.597014 |
| 8             | 1             | 0           | -0.548373               | 1.644131  | 1.088252  |
| 9             | 1             | 0           | 1.521925                | 2.193466  | -0.052843 |
| 10            | 1             | 0           | 1.149312                | 1.122128  | -1.403467 |
| 11            | 1             | 0           | 1.642980                | 0.159288  | 1.455366  |
| 12            | 1             | 0           | 2.853860                | 0.116516  | 0.172255  |
| 13            | 1             | 0           | 1.577591                | -1.479392 | -1.122009 |
| 14            | 1             | 0           | -0.835430               | -2.195752 | -0.167197 |
| 15            | 1             | 0           | 1.574038                | -2.073490 | 0.525130  |
| 16            | 8             | 0           | -2.379252               | -0.195887 | 0.075502  |
| 17            | 1             | 0           | -2.741064               | 0.694038  | 0.024713  |

Zero-point correction= 0.150272 (Hartree/Particle)  
Thermal correction to Gibbs Free Energy= 0.11972  
Sum of electronic and zero-point Energies= -309.501732  
SCF- Energy: M06 (PCM, toluene)/6-31G(d,p) = -309.6599427 (a.u.)

#### 1,4-Pro-SiH<sub>4</sub>:

Standard orientation:

| Center Number | Atomic Number | Atomic Type | Coordinates (Angstroms) |           |           |
|---------------|---------------|-------------|-------------------------|-----------|-----------|
|               |               |             | X                       | Y         | Z         |
| 1             | 14            | 0           | 2.784105                | 0.195742  | 0.071694  |
| 2             | 1             | 0           | 2.953538                | 1.077263  | -1.110611 |
| 3             | 1             | 0           | 3.911040                | -0.754554 | 0.159451  |
| 4             | 1             | 0           | 2.703871                | 1.036770  | 1.291335  |
| 5             | 6             | 0           | -0.855861               | -1.398039 | 0.065676  |
| 6             | 6             | 0           | -2.272553               | -0.934650 | -0.251038 |
| 7             | 6             | 0           | -2.554509               | 0.403375  | 0.418373  |
| 8             | 6             | 0           | -1.618694               | 1.476488  | -0.125973 |
| 9             | 6             | 0           | -0.195517               | 1.002234  | -0.180131 |
| 10            | 6             | 0           | 0.138917                | -0.288602 | -0.069868 |
| 11            | 8             | 0           | 1.422589                | -0.756595 | -0.065593 |
| 12            | 1             | 0           | -0.544313               | -2.219315 | -0.593862 |
| 13            | 1             | 0           | -0.796110               | -1.800845 | 1.089345  |
| 14            | 1             | 0           | -2.997458               | -1.695520 | 0.062518  |
| 15            | 1             | 0           | -2.384208               | -0.821482 | -1.340086 |
| 16            | 1             | 0           | -2.398595               | 0.300771  | 1.503207  |
| 17            | 1             | 0           | -3.600413               | 0.701214  | 0.274184  |
| 18            | 1             | 0           | -1.952631               | 1.782932  | -1.131584 |
| 19            | 1             | 0           | 0.580362                | 1.757493  | -0.317411 |
| 20            | 1             | 0           | -1.683963               | 2.382810  | 0.492316  |

Zero-point correction= 0.16664 (Hartree/Particle)  
Thermal correction to Gibbs Free Energy= 0.132457  
Sum of electronic and zero-point Energies= -600.184762  
SCF- Energy: M06 (PCM, toluene)/6-31G(d,p) = -600.3544537 (a.u.)

### S5. Cartesian coordinates and energies of all optimized structures along 1,2-path over the Ph<sub>3</sub>P-CuH system at the M06/6-31G(d, p) level.

#### 1,2-COM1:

Standard orientation:

| Center Number | Atomic Number | Atomic Type | Coordinates (Angstroms) |           |           |
|---------------|---------------|-------------|-------------------------|-----------|-----------|
|               |               |             | X                       | Y         | Z         |
| 1             | 29            | 0           | 1.460706                | 0.211161  | 0.203815  |
| 2             | 6             | 0           | 3.969814                | -1.158918 | 0.664755  |
| 3             | 6             | 0           | 4.902436                | -0.193863 | 1.381786  |
| 4             | 6             | 0           | 5.867713                | 0.464880  | 0.399886  |
| 5             | 6             | 0           | 5.170015                | 0.950051  | -0.833814 |
| 6             | 6             | 0           | 3.944414                | 0.541773  | -1.190017 |
| 7             | 6             | 0           | 3.193376                | -0.460084 | -0.423347 |
| 8             | 8             | 0           | 2.182112                | -1.055291 | -0.979441 |
| 9             | 1             | 0           | 3.275308                | -1.653259 | 1.356017  |
| 10            | 1             | 0           | 4.554390                | -1.959771 | 0.180071  |
| 11            | 1             | 0           | 5.456669                | -0.708794 | 2.175617  |
| 12            | 1             | 0           | 4.291007                | 0.582160  | 1.863143  |
| 13            | 1             | 0           | 6.660406                | -0.244616 | 0.106280  |
| 14            | 1             | 0           | 6.392882                | 1.300732  | 0.882466  |
| 15            | 1             | 0           | 5.701169                | 1.659722  | -1.467971 |
| 16            | 1             | 0           | 3.459766                | 0.911676  | -2.093471 |
| 17            | 15            | 0           | -0.763556               | 0.031519  | 0.012575  |
| 18            | 1             | 0           | 1.797020                | 1.263062  | 1.250218  |
| 19            | 6             | 0           | -1.439512               | -1.141524 | -1.206785 |
| 20            | 6             | 0           | -0.680037               | -1.382114 | -2.355757 |
| 21            | 6             | 0           | -2.684050               | -1.763187 | -1.059114 |
| 22            | 6             | 0           | -1.168766               | -2.222984 | -3.349949 |
| 23            | 1             | 0           | 0.309822                | -0.936842 | -2.445446 |
| 24            | 6             | 0           | -3.166674               | -2.605226 | -2.054480 |
| 25            | 1             | 0           | -3.273463               | -1.589501 | -0.158847 |
| 26            | 6             | 0           | -2.410707               | -2.831824 | -3.201712 |
| 27            | 1             | 0           | -0.571091               | -2.412577 | -4.238366 |
| 28            | 1             | 0           | -4.134586               | -3.086805 | -1.934061 |
| 29            | 1             | 0           | -2.788334               | -3.493726 | -3.977938 |
| 30            | 6             | 0           | -1.525249               | 1.632580  | -0.410047 |
| 31            | 6             | 0           | -0.838485               | 2.787519  | -0.022383 |
| 32            | 6             | 0           | -2.766049               | 1.744859  | -1.042952 |
| 33            | 6             | 0           | -1.392209               | 4.041039  | -0.260098 |
| 34            | 1             | 0           | 0.135732                | 2.678766  | 0.456219  |
| 35            | 6             | 0           | -3.313747               | 2.999868  | -1.281961 |
| 36            | 1             | 0           | -3.301175               | 0.848413  | -1.353702 |
| 37            | 6             | 0           | -2.628896               | 4.147132  | -0.888422 |
| 38            | 1             | 0           | -0.852893               | 4.935855  | 0.041641  |
| 39            | 1             | 0           | -4.278503               | 3.084281  | -1.777184 |
| 40            | 1             | 0           | -3.060941               | 5.127617  | -1.076479 |
| 41            | 6             | 0           | -1.546630               | -0.466888 | 1.580352  |
| 42            | 6             | 0           | -1.161639               | -1.698774 | 2.122664  |
| 43            | 6             | 0           | -2.465807               | 0.328517  | 2.263955  |
| 44            | 6             | 0           | -1.701125               | -2.132919 | 3.325797  |
| 45            | 1             | 0           | -0.438593               | -2.319763 | 1.590988  |
| 46            | 6             | 0           | -2.999666               | -0.107619 | 3.473939  |
| 47            | 1             | 0           | -2.765698               | 1.290048  | 1.849594  |
| 48            | 6             | 0           | -2.621349               | -1.335845 | 4.003672  |
| 49            | 1             | 0           | -1.400101               | -3.092512 | 3.739599  |
| 50            | 1             | 0           | -3.715869               | 0.516763  | 4.003197  |
| 51            | 1             | 0           | -3.039967               | -1.673735 | 4.948891  |

Zero-point correction= 0.409445 (Hartree/Particle)

Thermal correction to Gibbs Free Energy= 0.350478

Sum of electronic and zero-point Energies= -2984.591484

SCF- Energy: M06 (PCM, toluene)/6-31G(d,p) = -2985.013468 (a.u.)

#### 1,2-TS1:

Standard orientation:

| Center Number | Atomic Number | Atomic Type | Coordinates (Angstroms) |           |           |
|---------------|---------------|-------------|-------------------------|-----------|-----------|
|               |               |             | X                       | Y         | Z         |
| 1             | 29            | 0           | -1.231139               | 0.108822  | 0.498002  |
| 2             | 6             | 0           | -3.958547               | -0.518204 | -0.710537 |
| 3             | 6             | 0           | -4.925062               | 0.622862  | -0.980696 |
| 4             | 6             | 0           | -5.947129               | 0.744887  | 0.146582  |
| 5             | 6             | 0           | -5.302616               | 0.657546  | 1.498249  |
| 6             | 6             | 0           | -4.059564               | 0.210373  | 1.691179  |
| 7             | 6             | 0           | -3.206196               | -0.332252 | 0.596115  |
| 8             | 8             | 0           | -2.404066               | -1.327566 | 0.950329  |
| 9             | 1             | 0           | -3.242251               | -0.661724 | -1.530363 |
| 10            | 1             | 0           | -4.507882               | -1.467155 | -0.599047 |
| 11            | 1             | 0           | -5.430426               | 0.486243  | -1.944644 |
| 12            | 1             | 0           | -4.355138               | 1.561429  | -1.053694 |
| 13            | 1             | 0           | -6.706469               | -0.050121 | 0.056789  |
| 14            | 1             | 0           | -6.503662               | 1.688599  | 0.059263  |
| 15            | 1             | 0           | -5.897789               | 0.966652  | 2.358041  |
| 16            | 1             | 0           | -3.623341               | 0.152468  | 2.688465  |
| 17            | 15            | 0           | 0.843328                | 0.097241  | 0.072925  |
| 18            | 1             | 0           | -2.486750               | 1.015904  | 0.207509  |
| 19            | 6             | 0           | 1.004312                | -1.071493 | -1.319721 |
| 20            | 6             | 0           | -0.015129               | -2.021053 | -1.441431 |
| 21            | 6             | 0           | 2.087716                | -1.094553 | -2.200303 |
| 22            | 6             | 0           | 0.058851                | -2.994500 | -2.431794 |
| 23            | 1             | 0           | -0.859720               | -1.981330 | -0.749376 |
| 24            | 6             | 0           | 2.152580                | -2.065578 | -3.192725 |
| 25            | 1             | 0           | 2.876635                | -0.348739 | -2.112977 |
| 26            | 6             | 0           | 1.140975                | -3.016953 | -3.305614 |
| 27            | 1             | 0           | -0.733373               | -3.733766 | -2.522482 |
| 28            | 1             | 0           | 2.995081                | -2.081587 | -3.880360 |
| 29            | 1             | 0           | 1.197529                | -3.776576 | -4.082129 |
| 30            | 6             | 0           | 1.608731                | 1.657165  | -0.482594 |
| 31            | 6             | 0           | 2.992627                | 1.852114  | -0.542085 |
| 32            | 6             | 0           | 0.751338                | 2.683467  | -0.882283 |
| 33            | 6             | 0           | 3.506715                | 3.054327  | -1.013919 |
| 34            | 1             | 0           | 3.666787                | 1.066746  | -0.199832 |
| 35            | 6             | 0           | 1.267378                | 3.884837  | -1.356012 |
| 36            | 1             | 0           | -0.324143               | 2.523862  | -0.790470 |
| 37            | 6             | 0           | 2.644556                | 4.068520  | -1.424303 |
| 38            | 1             | 0           | 4.583188                | 3.203841  | -1.056322 |
| 39            | 1             | 0           | 0.593367                | 4.681339  | -1.662248 |
| 40            | 1             | 0           | 3.049911                | 5.009655  | -1.789220 |
| 41            | 6             | 0           | 1.997149                | -0.517006 | 1.346883  |
| 42            | 6             | 0           | 2.236637                | 0.298172  | 2.458737  |
| 43            | 6             | 0           | 2.583556                | -1.781201 | 1.282341  |
| 44            | 6             | 0           | 3.061194                | -0.141523 | 3.485241  |
| 45            | 1             | 0           | 1.777662                | 1.285777  | 2.513876  |
| 46            | 6             | 0           | 3.407658                | -2.219653 | 2.315443  |
| 47            | 1             | 0           | 2.395243                | -2.424993 | 0.424993  |
| 48            | 6             | 0           | 3.648816                | -1.402832 | 3.413872  |
| 49            | 1             | 0           | 3.245848                | 0.499117  | 4.344373  |
| 50            | 1             | 0           | 3.863099                | -3.205640 | 2.258615  |
| 51            | 1             | 0           | 4.292960                | -1.748762 | 4.218914  |

Zero-point correction= 0.409131 (Hartree/Particle)

Thermal correction to Gibbs Free Energy= 0.351273

Sum of electronic and zero-point Energies= -2984.573856

SCF- Energy: M06 (PCM, toluene)/6-31G(d,p) = -2985.002988 (a.u.)

### 1,2-IM1:

Standard orientation:

| Center Number | Atomic Number | Atomic Type | Coordinates (Angstroms) |           |           |
|---------------|---------------|-------------|-------------------------|-----------|-----------|
|               |               |             | X                       | Y         | Z         |
| 1             | 29            | 0           | -0.706680               | -0.073954 | -1.708572 |
| 2             | 6             | 0           | -3.453565               | -1.288485 | -1.081687 |
| 3             | 6             | 0           | -4.415584               | -1.022228 | 0.065859  |



|    |    |   |           |           |           |
|----|----|---|-----------|-----------|-----------|
| 4  | 6  | 0 | -3.798459 | -0.034634 | 1.053023  |
| 5  | 6  | 0 | -3.151735 | 1.118211  | 0.345479  |
| 6  | 6  | 0 | -2.916846 | 1.127015  | -0.972397 |
| 7  | 6  | 0 | -3.193374 | -0.028274 | -1.909787 |
| 8  | 8  | 0 | -2.124476 | -0.185152 | -2.790946 |
| 9  | 1  | 0 | -3.793614 | -2.098361 | -1.738345 |
| 10 | 1  | 0 | -2.470445 | -1.593996 | -0.678166 |
| 11 | 1  | 0 | -4.689908 | -1.952865 | 0.578974  |
| 12 | 1  | 0 | -5.349193 | -0.598839 | -0.336576 |
| 13 | 1  | 0 | -3.048201 | -0.548113 | 1.679393  |
| 14 | 1  | 0 | -4.556703 | 0.340872  | 1.755572  |
| 15 | 1  | 0 | -2.865520 | 1.982680  | 0.949087  |
| 16 | 1  | 0 | -2.513011 | 2.020673  | -1.454541 |
| 17 | 15 | 0 | 0.738978  | -0.012148 | -0.198852 |
| 18 | 1  | 0 | -4.117108 | 0.197359  | -2.483482 |
| 19 | 6  | 0 | 1.269840  | 1.688601  | 0.179473  |
| 20 | 6  | 0 | 0.549456  | 2.707259  | -0.446919 |
| 21 | 6  | 0 | 2.314422  | 2.014554  | 1.048170  |
| 22 | 6  | 0 | 0.855160  | 4.040841  | -0.200006 |
| 23 | 1  | 0 | -0.249474 | 2.415812  | -1.129314 |
| 24 | 6  | 0 | 2.622317  | 3.346996  | 1.292271  |
| 25 | 1  | 0 | 2.888205  | 1.225605  | 1.533355  |
| 26 | 6  | 0 | 1.891906  | 4.358798  | 0.670522  |
| 27 | 1  | 0 | 0.288895  | 4.828327  | -0.691103 |
| 28 | 1  | 0 | 3.436686  | 3.600541  | 1.967005  |
| 29 | 1  | 0 | 2.137586  | 5.400358  | 0.865035  |
| 30 | 6  | 0 | 0.075247  | -0.649353 | 1.375353  |
| 31 | 6  | 0 | -0.168829 | -2.024015 | 1.473581  |
| 32 | 6  | 0 | -0.300529 | 0.190762  | 2.423464  |
| 33 | 6  | 0 | -0.762490 | -2.551264 | 2.612653  |
| 34 | 1  | 0 | 0.108683  | -2.681479 | 0.649224  |
| 35 | 6  | 0 | -0.896619 | -0.341151 | 3.564177  |
| 36 | 1  | 0 | -0.128647 | 1.263371  | 2.350115  |
| 37 | 6  | 0 | -1.125930 | -1.709287 | 3.661579  |
| 38 | 1  | 0 | -0.944953 | -3.620966 | 2.682332  |
| 39 | 1  | 0 | -1.183874 | 0.318544  | 4.379665  |
| 40 | 1  | 0 | -1.591814 | -2.121344 | 4.553641  |
| 41 | 6  | 0 | 2.255793  | -0.981107 | -0.466603 |
| 42 | 6  | 0 | 2.607754  | -1.251617 | -1.790809 |
| 43 | 6  | 0 | 3.083757  | -1.424605 | 0.569055  |
| 44 | 6  | 0 | 3.778925  | -1.942190 | -2.081183 |
| 45 | 1  | 0 | 1.935284  | -0.931730 | -2.587220 |
| 46 | 6  | 0 | 4.253459  | -2.116525 | 0.278319  |
| 47 | 1  | 0 | 2.796993  | -1.248935 | 1.605674  |
| 48 | 6  | 0 | 4.603111  | -2.370933 | -1.045821 |
| 49 | 1  | 0 | 4.042045  | -2.153568 | -3.114700 |
| 50 | 1  | 0 | 4.892672  | -2.463998 | 1.086687  |
| 51 | 1  | 0 | 5.517145  | -2.916072 | -1.269982 |

Zero-point correction= 0.414631 (Hartree/Particle)

Thermal correction to Gibbs Free Energy= 0.357667

Sum of electronic and zero-point Energies= -2984.601517

SCF- Energy: M06 (PCM, toluene)/6-31G(d,p) = -2985.032298 (a.u.)

### 1,2-COM2-H<sub>2</sub>:

Standard orientation:

| Center Number | Atomic Number | Atomic Type | Coordinates (Angstroms) |           |           |
|---------------|---------------|-------------|-------------------------|-----------|-----------|
|               |               |             | X                       | Y         | Z         |
| 1             | 29            | 0           | -0.721517               | 0.282254  | -1.612972 |
| 2             | 6             | 0           | -3.512411               | -1.053265 | -1.328766 |
| 3             | 6             | 0           | -4.453130               | -1.105579 | -0.134701 |
| 4             | 6             | 0           | -3.796728               | -0.455975 | 1.081083  |
| 5             | 6             | 0           | -3.148221               | 0.847561  | 0.720909  |
| 6             | 6             | 0           | -2.922960               | 1.224816  | -0.543542 |
| 7             | 6             | 0           | -3.225132               | 0.383807  | -1.764035 |
| 8             | 8             | 0           | -2.159253               | 0.461062  | -2.662253 |
| 9             | 1             | 0           | -3.884618               | -1.630849 | -2.183500 |

|    |    |   |           |           |           |
|----|----|---|-----------|-----------|-----------|
| 10 | 1  | 0 | -2.535938 | -1.490014 | -1.049700 |
| 11 | 1  | 0 | -4.747009 | -2.137694 | 0.095034  |
| 12 | 1  | 0 | -5.378882 | -0.561887 | -0.379639 |
| 13 | 1  | 0 | -3.041391 | -1.138063 | 1.510610  |
| 14 | 1  | 0 | -4.532929 | -0.293886 | 1.881717  |
| 15 | 1  | 0 | -2.853171 | 1.507295  | 1.540009  |
| 16 | 1  | 0 | -2.520971 | 2.218001  | -0.759001 |
| 17 | 15 | 0 | 0.766792  | 0.011401  | -0.169557 |
| 18 | 1  | 0 | -4.142517 | 0.783312  | -2.245951 |
| 19 | 6  | 0 | 1.285254  | 1.595131  | 0.564588  |
| 20 | 6  | 0 | 0.539767  | 2.713626  | 0.187934  |
| 21 | 6  | 0 | 2.343690  | 1.740526  | 1.464716  |
| 22 | 6  | 0 | 0.836585  | 3.966865  | 0.711596  |
| 23 | 1  | 0 | -0.268960 | 2.563323  | -0.527727 |
| 24 | 6  | 0 | 2.643557  | 2.993659  | 1.983911  |
| 25 | 1  | 0 | 2.935609  | 0.874047  | 1.757654  |
| 26 | 6  | 0 | 1.888936  | 4.104685  | 1.610182  |
| 27 | 1  | 0 | 0.250676  | 4.832812  | 0.413628  |
| 28 | 1  | 0 | 3.469011  | 3.107536  | 2.682740  |
| 29 | 1  | 0 | 2.128208  | 5.083350  | 2.019929  |
| 30 | 6  | 0 | 0.147729  | -0.973021 | 1.233175  |
| 31 | 6  | 0 | -0.044621 | -2.346094 | 1.043051  |
| 32 | 6  | 0 | -0.263153 | -0.381883 | 2.428116  |
| 33 | 6  | 0 | -0.622427 | -3.118190 | 2.042128  |
| 34 | 1  | 0 | 0.256643  | -2.809441 | 0.103418  |
| 35 | 6  | 0 | -0.846146 | -1.157908 | 3.426527  |
| 36 | 1  | 0 | -0.131089 | 0.688420  | 2.578828  |
| 37 | 6  | 0 | -1.024450 | -2.524035 | 3.236569  |
| 38 | 1  | 0 | -0.765390 | -4.185006 | 1.887456  |
| 39 | 1  | 0 | -1.163660 | -0.690855 | 4.355976  |
| 40 | 1  | 0 | -1.481350 | -3.127085 | 4.017644  |
| 41 | 6  | 0 | 2.286054  | -0.846108 | -0.685093 |
| 42 | 6  | 0 | 2.598706  | -0.817734 | -2.046001 |
| 43 | 6  | 0 | 3.151684  | -1.489252 | 0.205180  |
| 44 | 6  | 0 | 3.765753  | -1.411708 | -2.513064 |
| 45 | 1  | 0 | 1.899519  | -0.342757 | -2.734683 |
| 46 | 6  | 0 | 4.316555  | -2.085292 | -0.262593 |
| 47 | 1  | 0 | 2.898353  | -1.544700 | 1.263534  |
| 48 | 6  | 0 | 4.625617  | -2.042996 | -1.620195 |
| 49 | 1  | 0 | 3.998443  | -1.389606 | -3.574821 |
| 50 | 1  | 0 | 4.984274  | -2.588967 | 0.432547  |
| 51 | 1  | 0 | 5.536496  | -2.513023 | -1.983786 |
| 52 | 1  | 0 | -1.767032 | 3.425111  | -3.516845 |
| 53 | 1  | 0 | -1.869226 | 2.745915  | -3.217548 |

Zero-point correction= 0.431030 (Hartree/Particle)

Thermal correction to Gibbs Free Energy= 0.372793

Sum of electronic and zero-point Energies= -2985.759040

SCF- Energy: M06 (PCM, toluene)/6-31G(d,p) = -2986.205298 (a.u.)

#### 1,2-COM2-SiH<sub>4</sub>:

Standard orientation:

| Center Number | Atomic Number | Atomic Type | Coordinates (Angstroms) |           |           |
|---------------|---------------|-------------|-------------------------|-----------|-----------|
|               |               |             | X                       | Y         | Z         |
| 1             | 29            | 0           | -0.833346               | 0.699417  | -0.755505 |
| 2             | 6             | 0           | -2.949837               | -1.148973 | -1.376377 |
| 3             | 6             | 0           | -3.906089               | -2.240369 | -0.926019 |
| 4             | 6             | 0           | -3.987310               | -2.278161 | 0.598042  |
| 5             | 6             | 0           | -4.070685               | -0.900010 | 1.187740  |
| 6             | 6             | 0           | -3.845229               | 0.216296  | 0.488174  |
| 7             | 6             | 0           | -3.438231               | 0.239906  | -0.965382 |
| 8             | 8             | 0           | -2.476678               | 1.217686  | -1.209597 |
| 9             | 1             | 0           | -2.766932               | -1.166416 | -2.458776 |
| 10            | 1             | 0           | -1.965972               | -1.281520 | -0.885350 |
| 11            | 1             | 0           | -3.606980               | -3.220074 | -1.319208 |
| 12            | 1             | 0           | -4.904438               | -2.028538 | -1.338509 |
| 13            | 1             | 0           | -3.098381               | -2.793832 | 1.004836  |

|    |    |   |           |           |           |
|----|----|---|-----------|-----------|-----------|
| 14 | 1  | 0 | -4.847338 | -2.879775 | 0.925271  |
| 15 | 1  | 0 | -4.328560 | -0.827196 | 2.246225  |
| 16 | 1  | 0 | -3.930687 | 1.193996  | 0.965435  |
| 17 | 15 | 0 | 1.019217  | 0.002329  | -0.069208 |
| 18 | 1  | 0 | -4.342449 | 0.477507  | -1.565858 |
| 19 | 6  | 0 | 1.976494  | 1.298354  | 0.776830  |
| 20 | 6  | 0 | 1.418459  | 2.578115  | 0.780219  |
| 21 | 6  | 0 | 3.197981  | 1.076539  | 1.419909  |
| 22 | 6  | 0 | 2.071441  | 3.630367  | 1.412866  |
| 23 | 1  | 0 | 0.458308  | 2.722756  | 0.283671  |
| 24 | 6  | 0 | 3.850699  | 2.127656  | 2.050142  |
| 25 | 1  | 0 | 3.638951  | 0.080426  | 1.425917  |
| 26 | 6  | 0 | 3.288209  | 3.403649  | 2.045719  |
| 27 | 1  | 0 | 1.628094  | 4.622847  | 1.410973  |
| 28 | 1  | 0 | 4.801335  | 1.954447  | 2.549209  |
| 29 | 1  | 0 | 3.802799  | 4.222895  | 2.542606  |
| 30 | 6  | 0 | 0.740222  | -1.305483 | 1.167148  |
| 31 | 6  | 0 | -0.537062 | -1.351963 | 1.729704  |
| 32 | 6  | 0 | 1.722605  | -2.198291 | 1.604467  |
| 33 | 6  | 0 | -0.826086 | -2.263792 | 2.738646  |
| 34 | 1  | 0 | -1.305477 | -0.680261 | 1.340924  |
| 35 | 6  | 0 | 1.429567  | -3.113056 | 2.608423  |
| 36 | 1  | 0 | 2.710190  | -2.192016 | 1.143658  |
| 37 | 6  | 0 | 0.158635  | -3.140967 | 3.180638  |
| 38 | 1  | 0 | -1.824191 | -2.290905 | 3.171652  |
| 39 | 1  | 0 | 2.193106  | -3.809892 | 2.946414  |
| 40 | 1  | 0 | -0.064419 | -3.858110 | 3.967247  |
| 41 | 6  | 0 | 2.146205  | -0.743478 | -1.288159 |
| 42 | 6  | 0 | 3.261371  | -0.064753 | -1.781503 |
| 43 | 6  | 0 | 1.804564  | -1.989654 | -1.825747 |
| 44 | 6  | 0 | 4.038222  | -0.635577 | -2.785235 |
| 45 | 1  | 0 | 3.525736  | 0.911351  | -1.378214 |
| 46 | 6  | 0 | 2.583754  | -2.556445 | -2.825573 |
| 47 | 1  | 0 | 0.925515  | -2.517363 | -1.454711 |
| 48 | 6  | 0 | 3.703315  | -1.880744 | -3.305220 |
| 49 | 1  | 0 | 4.908514  | -0.103211 | -3.161801 |
| 50 | 1  | 0 | 2.315860  | -3.527627 | -3.234890 |
| 51 | 1  | 0 | 4.311836  | -2.325162 | -4.089191 |
| 52 | 14 | 0 | -2.917229 | 3.799815  | -0.708738 |
| 53 | 1  | 0 | -2.580562 | 3.262654  | 0.635682  |
| 54 | 1  | 0 | -1.772336 | 3.702933  | -1.647380 |
| 55 | 1  | 0 | -4.195722 | 3.269462  | -1.236876 |
| 56 | 1  | 0 | -3.139659 | 5.268690  | -0.498791 |

Zero-point correction= 0.448953 (Hartree/Particle)

Thermal correction to Gibbs Free Energy= 0.383793

Sum of electronic and zero-point Energies= -3276.426236

SCF- Energy: M06 (PCM, toluene)/6-31G(d,p) = -3276.888559 (a.u.)

### 1,2-TS2-H<sub>2</sub>:

Standard orientation:

| Center Number | Atomic Number | Atomic Type | Coordinates (Angstroms) |           |           |
|---------------|---------------|-------------|-------------------------|-----------|-----------|
|               |               |             | X                       | Y         | Z         |
| 1             | 29            | 0           | 0.470804                | 0.338727  | -1.809550 |
| 2             | 6             | 0           | 2.832704                | -0.760268 | -1.012254 |
| 3             | 6             | 0           | 3.682505                | -1.536530 | -0.020654 |
| 4             | 6             | 0           | 5.141924                | -1.096999 | -0.117403 |
| 5             | 6             | 0           | 5.274188                | 0.393328  | -0.240996 |
| 6             | 6             | 0           | 4.240698                | 1.203150  | -0.476715 |
| 7             | 6             | 0           | 2.827992                | 0.730758  | -0.670359 |
| 8             | 8             | 0           | 2.150123                | 1.512063  | -1.611409 |
| 9             | 1             | 0           | 1.793717                | -1.136630 | -1.020563 |
| 10            | 1             | 0           | 3.231807                | -0.886963 | -2.031094 |
| 11            | 1             | 0           | 3.593407                | -2.617900 | -0.187267 |
| 12            | 1             | 0           | 3.307046                | -1.345952 | 0.997641  |
| 13            | 1             | 0           | 5.620987                | -1.575461 | -0.988092 |

|    |    |   |           |           |           |
|----|----|---|-----------|-----------|-----------|
| 14 | 1  | 0 | 5.706403  | -1.454708 | 0.755765  |
| 15 | 1  | 0 | 6.275790  | 0.813014  | -0.139342 |
| 16 | 1  | 0 | 4.385635  | 2.280165  | -0.561520 |
| 17 | 15 | 0 | -0.911952 | 0.003929  | -0.264364 |
| 18 | 1  | 0 | 2.298807  | 0.826740  | 0.311040  |
| 19 | 6  | 0 | -1.319226 | 1.602890  | 0.509897  |
| 20 | 6  | 0 | -0.377575 | 2.629235  | 0.371220  |
| 21 | 6  | 0 | -2.472947 | 1.813785  | 1.269106  |
| 22 | 6  | 0 | -0.587882 | 3.849843  | 1.004857  |
| 23 | 1  | 0 | 0.514278  | 2.470360  | -0.241423 |
| 24 | 6  | 0 | -2.680296 | 3.038913  | 1.891445  |
| 25 | 1  | 0 | -3.213751 | 1.021065  | 1.367295  |
| 26 | 6  | 0 | -1.736141 | 4.054752  | 1.763082  |
| 27 | 1  | 0 | 0.145792  | 4.644981  | 0.896267  |
| 28 | 1  | 0 | -3.581449 | 3.203086  | 2.477839  |
| 29 | 1  | 0 | -1.900681 | 5.012564  | 2.251820  |
| 30 | 6  | 0 | -2.514492 | -0.783599 | -0.622576 |
| 31 | 6  | 0 | -3.256844 | -1.474863 | 0.339833  |
| 32 | 6  | 0 | -3.029789 | -0.640117 | -1.912669 |
| 33 | 6  | 0 | -4.497680 | -2.010463 | 0.013304  |
| 34 | 1  | 0 | -2.854360 | -1.604238 | 1.344284  |
| 35 | 6  | 0 | -4.273175 | -1.171198 | -2.236463 |
| 36 | 1  | 0 | -2.432140 | -0.126503 | -2.666381 |
| 37 | 6  | 0 | -5.007251 | -1.856277 | -1.273208 |
| 38 | 1  | 0 | -5.067935 | -2.551846 | 0.764680  |
| 39 | 1  | 0 | -4.665525 | -1.057897 | -3.244210 |
| 40 | 1  | 0 | -5.976674 | -2.278828 | -1.527168 |
| 41 | 6  | 0 | -0.205413 | -1.001014 | 1.086385  |
| 42 | 6  | 0 | 0.041823  | -2.355664 | 0.834758  |
| 43 | 6  | 0 | 0.203032  | -0.442258 | 2.298039  |
| 44 | 6  | 0 | 0.677519  | -3.141167 | 1.787059  |
| 45 | 1  | 0 | -0.265407 | -2.793117 | -0.116056 |
| 46 | 6  | 0 | 0.846951  | -1.231342 | 3.247689  |
| 47 | 1  | 0 | 0.025800  | 0.613458  | 2.497923  |
| 48 | 6  | 0 | 1.085493  | -2.577460 | 2.994399  |
| 49 | 1  | 0 | 0.864531  | -4.193220 | 1.584564  |
| 50 | 1  | 0 | 1.165043  | -0.789202 | 4.188950  |
| 51 | 1  | 0 | 1.591312  | -3.189939 | 3.737021  |
| 52 | 1  | 0 | 1.139303  | 0.422167  | -3.349563 |
| 53 | 1  | 0 | 1.746531  | 0.891686  | -2.735401 |

Zero-point correction= 0.428195 (Hartree/Particle)

Thermal correction to Gibbs Free Energy= 0.373084

Sum of electronic and zero-point Energies= -2985.728714

SCF- Energy: M06 (PCM, toluene)/6-31G(d,p) = -2986.170322 (a.u.)

### 1,2-COM3-H<sub>2</sub>:

Standard orientation:

| Center Number | Atomic Number | Atomic Type | Coordinates (Angstroms) |           |           |
|---------------|---------------|-------------|-------------------------|-----------|-----------|
|               |               |             | X                       | Y         | Z         |
| 1             | 29            | 0           | 0.344131                | -0.055836 | -2.001622 |
| 2             | 6             | 0           | 2.799566                | -0.836301 | -0.947028 |
| 3             | 6             | 0           | 3.680734                | -1.507588 | 0.092576  |
| 4             | 6             | 0           | 5.123146                | -1.027757 | -0.052024 |
| 5             | 6             | 0           | 5.204294                | 0.455147  | -0.261611 |
| 6             | 6             | 0           | 4.144932                | 1.217189  | -0.541519 |
| 7             | 6             | 0           | 2.766357                | 0.660940  | -0.705502 |
| 8             | 8             | 0           | 2.047951                | 1.338620  | -1.741707 |
| 9             | 1             | 0           | 1.766295                | -1.216874 | -0.939810 |
| 10            | 1             | 0           | 3.198173                | -1.022637 | -1.957481 |
| 11            | 1             | 0           | 3.622714                | -2.598986 | 0.006045  |
| 12            | 1             | 0           | 3.309472                | -1.253914 | 1.097999  |
| 13            | 1             | 0           | 5.609240                | -1.535769 | -0.901234 |
| 14            | 1             | 0           | 5.714166                | -1.309752 | 0.830315  |
| 15            | 1             | 0           | 6.186564                | 0.919707  | -0.172913 |
| 16            | 1             | 0           | 4.248221                | 2.295701  | -0.661709 |
| 17            | 15            | 0           | -0.835965               | 0.018766  | -0.232961 |

|    |   |   |           |           |           |
|----|---|---|-----------|-----------|-----------|
| 18 | 1 | 0 | 2.165920  | 0.867707  | 0.198443  |
| 19 | 6 | 0 | -1.399621 | 1.678515  | 0.290791  |
| 20 | 6 | 0 | -0.557414 | 2.759413  | 0.007163  |
| 21 | 6 | 0 | -2.589475 | 1.905605  | 0.987783  |
| 22 | 6 | 0 | -0.896274 | 4.042747  | 0.424909  |
| 23 | 1 | 0 | 0.361440  | 2.593472  | -0.556937 |
| 24 | 6 | 0 | -2.928683 | 3.189427  | 1.398430  |
| 25 | 1 | 0 | -3.262577 | 1.075463  | 1.195671  |
| 26 | 6 | 0 | -2.080981 | 4.258382  | 1.120844  |
| 27 | 1 | 0 | -0.237144 | 4.877179  | 0.196634  |
| 28 | 1 | 0 | -3.860178 | 3.357021  | 1.934556  |
| 29 | 1 | 0 | -2.349443 | 5.262627  | 1.441170  |
| 30 | 6 | 0 | -2.366491 | -0.950931 | -0.452650 |
| 31 | 6 | 0 | -3.139636 | -1.440426 | 0.605226  |
| 32 | 6 | 0 | -2.775495 | -1.180180 | -1.768306 |
| 33 | 6 | 0 | -4.316111 | -2.133943 | 0.345993  |
| 34 | 1 | 0 | -2.808455 | -1.292574 | 1.633394  |
| 35 | 6 | 0 | -3.955429 | -1.870069 | -2.025266 |
| 36 | 1 | 0 | -2.124719 | -0.834417 | -2.573302 |
| 37 | 6 | 0 | -4.726475 | -2.343732 | -0.969037 |
| 38 | 1 | 0 | -4.913074 | -2.516880 | 1.170817  |
| 39 | 1 | 0 | -4.264747 | -2.048127 | -3.052494 |
| 40 | 1 | 0 | -5.646127 | -2.889511 | -1.168852 |
| 41 | 6 | 0 | -0.107588 | -0.700798 | 1.282560  |
| 42 | 6 | 0 | 0.161049  | -2.075683 | 1.282699  |
| 43 | 6 | 0 | 0.312906  | 0.075145  | 2.364485  |
| 44 | 6 | 0 | 0.828117  | -2.662206 | 2.349912  |
| 45 | 1 | 0 | -0.159429 | -2.685599 | 0.436982  |
| 46 | 6 | 0 | 0.987329  | -0.515008 | 3.430724  |
| 47 | 1 | 0 | 0.110869  | 1.145782  | 2.372816  |
| 48 | 6 | 0 | 1.245443  | -1.881534 | 3.426783  |
| 49 | 1 | 0 | 1.027028  | -3.731653 | 2.342135  |
| 50 | 1 | 0 | 1.306706  | 0.096927  | 4.271513  |
| 51 | 1 | 0 | 1.769646  | -2.340774 | 4.261720  |
| 52 | 1 | 0 | 0.401530  | -0.501938 | -3.480072 |
| 53 | 1 | 0 | 2.518776  | 1.218478  | -2.577904 |

Zero-point correction= 0.432658 (Hartree/Particle)

Thermal correction to Gibbs Free Energy= 0.37412

Sum of electronic and zero-point Energies= -2985.750929

SCF- Energy: M06 (PCM, toluene)/6-31G(d,p) = -2986.203597 (a.u.)

### 1,2-Pro-H<sub>2</sub>:

Standard orientation:

| Center Number | Atomic Number | Atomic Type | Coordinates (Angstroms) |           |           |
|---------------|---------------|-------------|-------------------------|-----------|-----------|
|               |               |             | X                       | Y         | Z         |
| 1             | 6             | 0           | -0.228924               | -1.215840 | -0.211562 |
| 2             | 6             | 0           | 1.214518                | -1.135552 | 0.265481  |
| 3             | 6             | 0           | 1.873265                | 0.147906  | -0.233539 |
| 4             | 6             | 0           | 0.971146                | 1.335708  | -0.074671 |
| 5             | 6             | 0           | -0.326788               | 1.235506  | 0.218576  |
| 6             | 6             | 0           | -1.048532               | -0.073631 | 0.372501  |
| 7             | 8             | 0           | -2.346607               | -0.010007 | -0.189948 |
| 8             | 1             | 0           | -0.695967               | -2.174352 | 0.043755  |
| 9             | 1             | 0           | -0.255162               | -1.128038 | -1.311037 |
| 10            | 1             | 0           | 1.786297                | -2.013031 | -0.060019 |
| 11            | 1             | 0           | 1.228245                | -1.143477 | 1.366097  |
| 12            | 1             | 0           | 2.147108                | 0.042182  | -1.296581 |
| 13            | 1             | 0           | 2.821164                | 0.327389  | 0.292775  |
| 14            | 1             | 0           | 1.416470                | 2.322707  | -0.205387 |
| 15            | 1             | 0           | -0.941098               | 2.127691  | 0.344681  |
| 16            | 1             | 0           | -1.223270               | -0.269594 | 1.443472  |
| 17            | 1             | 0           | -2.239037               | 0.223995  | -1.118878 |

Zero-point correction= 0.150598 (Hartree/Particle)

Thermal correction to Gibbs Free Energy= 0.120464

Sum of electronic and zero-point Energies= -309.493069

SCF- Energy: M06 (PCM, toluene)/6-31G(d,p) = -309.6529324 (a.u.)

**1,2-TS2-SiH<sub>4</sub>:**

Standard orientation:

| Center<br>Number | Atomic<br>Number | Atomic<br>Type | Coordinates (Angstroms) |           |           |
|------------------|------------------|----------------|-------------------------|-----------|-----------|
|                  |                  |                | X                       | Y         | Z         |
| 1                | 14               | 0              | -2.613434               | -2.726262 | -1.004906 |
| 2                | 1                | 0              | -2.954935               | -2.690427 | -2.453101 |
| 3                | 1                | 0              | -3.842914               | -2.615219 | -0.145359 |
| 4                | 1                | 0              | -2.360178               | -4.199509 | -0.747876 |
| 5                | 6                | 0              | -4.396292               | 0.200858  | -1.471565 |
| 6                | 6                | 0              | -5.449827               | 1.203152  | -1.018340 |
| 7                | 6                | 0              | -6.133850               | 0.732982  | 0.263646  |
| 8                | 6                | 0              | -5.155280               | 0.176498  | 1.254699  |
| 9                | 6                | 0              | -3.891628               | -0.118023 | 0.946141  |
| 10               | 6                | 0              | -3.300553               | 0.096862  | -0.422269 |
| 11               | 8                | 0              | -2.340067               | -0.888177 | -0.744114 |
| 12               | 1                | 0              | -3.954120               | 0.479453  | -2.436400 |
| 13               | 1                | 0              | -4.853726               | -0.791432 | -1.598199 |
| 14               | 1                | 0              | -6.193476               | 1.371876  | -1.806795 |
| 15               | 1                | 0              | -4.965414               | 2.174976  | -0.834366 |
| 16               | 1                | 0              | -6.878987               | -0.044707 | 0.027690  |
| 17               | 1                | 0              | -6.705552               | 1.554604  | 0.718060  |
| 18               | 1                | 0              | -5.519289               | -0.012948 | 2.264884  |
| 19               | 1                | 0              | -3.222801               | -0.544127 | 1.697593  |
| 20               | 1                | 0              | -2.745514               | 1.057460  | -0.410724 |
| 21               | 29               | 0              | -0.431201               | -1.031305 | -0.722064 |
| 22               | 15               | 0              | 1.303429                | -0.024952 | -0.090258 |
| 23               | 6                | 0              | 2.775453                | -1.081636 | 0.099562  |
| 24               | 6                | 0              | 4.069638                | -0.597460 | 0.314155  |
| 25               | 6                | 0              | 2.554102                | -2.458988 | 0.053547  |
| 26               | 6                | 0              | 5.121754                | -1.486574 | 0.498153  |
| 27               | 1                | 0              | 4.258719                | 0.475849  | 0.313530  |
| 28               | 6                | 0              | 3.606326                | -3.347988 | 0.242193  |
| 29               | 1                | 0              | 1.541090                | -2.805952 | -0.155503 |
| 30               | 6                | 0              | 4.889223                | -2.860165 | 0.467664  |
| 31               | 1                | 0              | 6.128426                | -1.108203 | 0.660613  |
| 32               | 1                | 0              | 3.425430                | -4.419299 | 0.202884  |
| 33               | 1                | 0              | 5.715773                | -3.552609 | 0.609845  |
| 34               | 6                | 0              | 0.931010                | 0.621476  | 1.576170  |
| 35               | 6                | 0              | 1.866553                | 1.144368  | 2.471142  |
| 36               | 6                | 0              | -0.420870               | 0.604289  | 1.923063  |
| 37               | 6                | 0              | 1.442053                | 1.647095  | 3.695354  |
| 38               | 1                | 0              | 2.925518                | 1.154385  | 2.216601  |
| 39               | 6                | 0              | -0.847315               | 1.113892  | 3.143026  |
| 40               | 1                | 0              | -1.112292               | 0.167357  | 1.203907  |
| 41               | 6                | 0              | 0.088039                | 1.636625  | 4.029481  |
| 42               | 1                | 0              | 2.169582                | 2.051243  | 4.395626  |
| 43               | 1                | 0              | -1.905862               | 1.097892  | 3.394174  |
| 44               | 1                | 0              | -0.234970               | 2.035093  | 4.988541  |
| 45               | 6                | 0              | 1.892702                | 1.415019  | -1.039959 |
| 46               | 6                | 0              | 1.534367                | 2.718595  | -0.691513 |
| 47               | 6                | 0              | 2.628225                | 1.192258  | -2.208815 |
| 48               | 6                | 0              | 1.922572                | 3.786841  | -1.493937 |
| 49               | 1                | 0              | 0.951331                | 2.899413  | 0.210338  |
| 50               | 6                | 0              | 3.016094                | 2.261636  | -3.005569 |
| 51               | 1                | 0              | 2.901908                | 0.175004  | -2.488385 |
| 52               | 6                | 0              | 2.665216                | 3.561145  | -2.648010 |
| 53               | 1                | 0              | 1.644357                | 4.800358  | -1.214328 |
| 54               | 1                | 0              | 3.592806                | 2.080894  | -3.909682 |
| 55               | 1                | 0              | 2.968665                | 4.398275  | -3.272267 |
| 56               | 1                | 0              | -0.957827               | -2.611023 | -0.984080 |

Zero-point correction= 0.448323 (Hartree/Particle)

Thermal correction to Gibbs Free Energy= 0.386079

Sum of electronic and zero-point Energies= -3276.407849

SCF- Energy: M06 (PCM, toluene)/6-31G(d,p) = -3276.86933 (a.u)

1,2-COM3-SiH<sub>4</sub>:

Standard orientation:

| Center Number | Atomic Number | Atomic Type | Coordinates (Angstroms) |           |           |
|---------------|---------------|-------------|-------------------------|-----------|-----------|
|               |               |             | X                       | Y         | Z         |
| 1             | 14            | 0           | -3.050344               | -2.631440 | -1.356634 |
| 2             | 1             | 0           | -3.579349               | -1.934321 | -2.549193 |
| 3             | 1             | 0           | -4.190682               | -3.188885 | -0.580670 |
| 4             | 1             | 0           | -2.113558               | -3.712985 | -1.708079 |
| 5             | 6             | 0           | -2.604432               | 0.717621  | -0.959476 |
| 6             | 6             | 0           | -3.251713               | 2.000208  | -0.465392 |
| 7             | 6             | 0           | -4.731893               | 1.762946  | -0.178318 |
| 8             | 6             | 0           | -4.958283               | 0.485505  | 0.573498  |
| 9             | 6             | 0           | -4.022624               | -0.455021 | 0.723419  |
| 10            | 6             | 0           | -2.653966               | -0.340483 | 0.129382  |
| 11            | 8             | 0           | -2.169474               | -1.595504 | -0.358397 |
| 12            | 1             | 0           | -1.552615               | 0.865380  | -1.254735 |
| 13            | 1             | 0           | -3.134097               | 0.346807  | -1.849910 |
| 14            | 1             | 0           | -3.122704               | 2.805591  | -1.198319 |
| 15            | 1             | 0           | -2.744894               | 2.331470  | 0.455053  |
| 16            | 1             | 0           | -5.300413               | 1.729893  | -1.122143 |
| 17            | 1             | 0           | -5.155816               | 2.604284  | 0.386895  |
| 18            | 1             | 0           | -5.938986               | 0.336589  | 1.025577  |
| 19            | 1             | 0           | -4.225197               | -1.348429 | 1.314240  |
| 20            | 1             | 0           | -1.934828               | -0.061281 | 0.922940  |
| 21            | 29            | 0           | -0.419116               | -0.882985 | -1.520408 |
| 22            | 15            | 0           | 0.989233                | -0.061920 | -0.133762 |
| 23            | 6             | 0           | 2.567824                | 0.279469  | -0.985036 |
| 24            | 6             | 0           | 3.504092                | 1.223704  | -0.553127 |
| 25            | 6             | 0           | 2.847722                | -0.507232 | -2.104858 |
| 26            | 6             | 0           | 4.711516                | 1.366015  | -1.228147 |
| 27            | 1             | 0           | 3.280650                | 1.856412  | 0.305950  |
| 28            | 6             | 0           | 4.059450                | -0.369534 | -2.772098 |
| 29            | 1             | 0           | 2.077923                | -1.196353 | -2.455936 |
| 30            | 6             | 0           | 4.991881                | 0.564842  | -2.332494 |
| 31            | 1             | 0           | 5.435989                | 2.104725  | -0.892215 |
| 32            | 1             | 0           | 4.270069                | -0.983919 | -3.644229 |
| 33            | 1             | 0           | 5.937642                | 0.679017  | -2.857777 |
| 34            | 6             | 0           | 1.460067                | -1.136846 | 1.268858  |
| 35            | 6             | 0           | 2.702697                | -1.065176 | 1.905075  |
| 36            | 6             | 0           | 0.502119                | -2.040391 | 1.740791  |
| 37            | 6             | 0           | 2.981617                | -1.881981 | 2.994220  |
| 38            | 1             | 0           | 3.460077                | -0.375096 | 1.536200  |
| 39            | 6             | 0           | 0.782275                | -2.853968 | 2.834338  |
| 40            | 1             | 0           | -0.461930               | -2.116068 | 1.235862  |
| 41            | 6             | 0           | 2.021196                | -2.775683 | 3.461238  |
| 42            | 1             | 0           | 3.953419                | -1.822744 | 3.479254  |
| 43            | 1             | 0           | 0.033074                | -3.556783 | 3.191590  |
| 44            | 1             | 0           | 2.243183                | -3.416121 | 4.311923  |
| 45            | 6             | 0           | 0.575771                | 1.539203  | 0.645426  |
| 46            | 6             | 0           | 0.358792                | 1.691171  | 2.016030  |
| 47            | 6             | 0           | 0.356658                | 2.630795  | -0.205472 |
| 48            | 6             | 0           | -0.065581               | 2.915649  | 2.527648  |
| 49            | 1             | 0           | 0.522732                | 0.848992  | 2.687432  |
| 50            | 6             | 0           | -0.061303               | 3.851335  | 0.307920  |
| 51            | 1             | 0           | 0.521599                | 2.519149  | -1.278331 |
| 52            | 6             | 0           | -0.276046               | 3.995806  | 1.677704  |
| 53            | 1             | 0           | -0.228598               | 3.024462  | 3.597654  |
| 54            | 1             | 0           | -0.223244               | 4.692971  | -0.361894 |
| 55            | 1             | 0           | -0.607552               | 4.950325  | 2.079897  |
| 56            | 1             | 0           | -0.632432               | -1.431237 | -2.945469 |

Zero-point correction= 0.448803 (Hartree/Particle)

Thermal correction to Gibbs Free Energy= 0.388595

Sum of electronic and zero-point Energies= -3276.43437

SCF- Energy: M06 (PCM, toluene)/6-31G(d,p) = -3276.898428 (a.u)

**1,2-Pro-SiH<sub>4</sub>:**

Standard orientation:

| Center<br>Number | Atomic<br>Number | Atomic<br>Type | Coordinates (Angstroms) |           |           |
|------------------|------------------|----------------|-------------------------|-----------|-----------|
|                  |                  |                | X                       | Y         | Z         |
| 1                | 14               | 0              | -2.411396               | 0.201761  | -0.500580 |
| 2                | 1                | 0              | -1.798949               | 0.081451  | -1.851792 |
| 3                | 1                | 0              | -2.615901               | 1.646446  | -0.216285 |
| 4                | 1                | 0              | -3.721464               | -0.484815 | -0.485300 |
| 5                | 6                | 0              | 0.647394                | -1.279056 | -0.178591 |
| 6                | 6                | 0              | 2.135759                | -0.964803 | -0.140394 |
| 7                | 6                | 0              | 2.387048                | 0.475987  | -0.576400 |
| 8                | 6                | 0              | 1.425344                | 1.426154  | 0.071546  |
| 9                | 6                | 0              | 0.322607                | 1.030924  | 0.711921  |
| 10               | 6                | 0              | -0.103824               | -0.405930 | 0.816891  |
| 11               | 8                | 0              | -1.508276               | -0.552157 | 0.665224  |
| 12               | 1                | 0              | 0.443000                | -2.334531 | 0.036437  |
| 13               | 1                | 0              | 0.256357                | -1.074233 | -1.187298 |
| 14               | 1                | 0              | 2.698468                | -1.661815 | -0.772572 |
| 15               | 1                | 0              | 2.508969                | -1.101269 | 0.886232  |
| 16               | 1                | 0              | 2.296913                | 0.561029  | -1.671857 |
| 17               | 1                | 0              | 3.418091                | 0.777286  | -0.345364 |
| 18               | 1                | 0              | 1.660038                | 2.489671  | 0.022082  |
| 19               | 1                | 0              | -0.321091               | 1.760155  | 1.205388  |
| 20               | 1                | 0              | 0.115355                | -0.766416 | 1.836831  |

Zero-point correction= 0.16672 (Hartree/Particle)

Thermal correction to Gibbs Free Energy= 0.134061

Sum of electronic and zero-point Energies= -600.175557

SCF- Energy: M06 (PCM, toluene)/6-31G(d,p) = -600.3479058 (a.u)



### Part III: (R)-SEGPHOS-CuH system

S6: The summarize energies of species along all reaction paths in the (R)-SEGPHOS-CuH system .

| Speices                | M06/6-31G(d,p) |           |              |                  |                 | M06(PCM)/6-31G** |                    |                  |
|------------------------|----------------|-----------|--------------|------------------|-----------------|------------------|--------------------|------------------|
|                        | ZPE            | ZPG       | Ezpe         | E <sub>ZPG</sub> | G <sub>RT</sub> | PCM              | PCM <sub>ZPG</sub> | G <sub>sol</sub> |
| <b>2</b>               | 0.210174       | 0.17545   | -426.099915  | -426.13464       |                 | -426.3167695     | -426.1413195       |                  |
| CAT                    | 0.566456       | 0.496123  | -4087.413591 | -4087.483925     |                 | -4088.003977     | -4087.507854       |                  |
| H <sub>2</sub>         | 0.010096       | -0.001386 | -1.159205    | -1.170687        |                 | -1.1693618       | -1.1707478         |                  |
| H <sub>2</sub> + CAT+2 | 0.786726       | 0.670187  | -4514.672711 | -4514.789252     | 0.0             | -4515.490108     | -4514.819922       | 0.0              |
| Pro                    | 0.234852       | 0.200588  | -427.272208  | -427.306473      |                 | -427.5143545     | -427.3137665       |                  |
| Pro+CAT                | 0.801308       | 0.696711  | -4514.685799 | -4514.790398     | -3.0            | -4515.518332     | -4514.821621       | -4.5             |
| <i>S</i> -out-COM1     | 0.796673       | 0.715501  | -4514.713863 | -4514.795035     | -15.2           | -4515.534704     | -4514.819203       | 1.9              |
| <i>S</i> -out-TS1      | 0.796007       | 0.715117  | -4514.709088 | -4514.789978     | -1.9            | -4515.530101     | -4514.814984       | 13.0             |
| <i>S</i> -out-COM2     | 0.802115       | 0.721165  | -4514.726804 | -4514.807753     | -48.6           | -4515.55391      | -4514.832745       | -33.7            |
| <i>S</i> -out-TS2      | 0.798817       | 0.718748  | -4514.717787 | -4514.797855     | -22.6           | -4515.539952     | -4514.821204       | -3.4             |
| <i>S</i> -out-COM3     | 0.803356       | 0.72223   | -4514.718215 | -4514.799341     | -26.5           | -4515.545863     | -4514.823633       | -9.7             |
| <i>R</i> -out-COM1     | 0.795678       | 0.714736  | -4514.721998 | -4514.802940     | -35.9           | -4515.54048      | -4514.825744       | -15.3            |
| <i>R</i> -out-TS1      | 0.796826       | 0.716579  | -4514.714205 | -4514.794452     | -13.7           | -4515.535035     | -4514.818456       | 3.8              |
| <i>R</i> -out-COM2     | 0.802014       | 0.72083   | -4514.732756 | -4514.81394      | -64.8           | -4515.560408     | -4514.839578       | -51.6            |
| <i>R</i> -out-TS2      | 0.798826       | 0.718763  | -4514.718754 | -4514.798817     | -25.1           | -4515.541149     | -4514.822386       | -6.5             |
| <i>R</i> -out-COM3     | 0.803976       | 0.723722  | -4514.721758 | -4514.802012     | -33.5           | -4515.548217     | -4514.824495       | -12.0            |

CAT=(R)-SEGPHOS-CuH

**S7. Cartesian coordinates and energies of species along all reaction paths over the  
SEGPPOS-CuH system at the M06/6-31G(d,p) level.**

**(R)-SEGPPOS-CuH:**

Standard orientation:

| Center<br>Number | Atomic<br>Number | Atomic<br>Type | Coordinates (Angstroms) |           |           |
|------------------|------------------|----------------|-------------------------|-----------|-----------|
|                  |                  |                | X                       | Y         | Z         |
| 1                | 6                | 0              | -0.011142               | -0.034260 | 0.007693  |
| 2                | 6                | 0              | -0.002936               | -0.014903 | 1.380695  |
| 3                | 6                | 0              | 1.183621                | 0.006756  | 2.101643  |
| 4                | 6                | 0              | 2.427219                | -0.022883 | 1.508556  |
| 5                | 6                | 0              | 2.438258                | 0.004310  | 0.084920  |
| 6                | 6                | 0              | 1.239917                | -0.015428 | -0.627188 |
| 7                | 6                | 0              | 3.642251                | -0.064216 | 2.363930  |
| 8                | 6                | 0              | 4.002866                | 1.053030  | 3.085992  |
| 9                | 6                | 0              | 5.139303                | 1.108463  | 3.882952  |
| 10               | 6                | 0              | 5.977792                | 0.029867  | 4.019211  |
| 11               | 6                | 0              | 5.615405                | -1.136168 | 3.329192  |
| 12               | 6                | 0              | 4.473177                | -1.208838 | 2.532868  |
| 13               | 8                | 0              | -1.059131               | -0.017438 | 2.240892  |
| 14               | 6                | 0              | -0.506662               | -0.029956 | 3.548559  |
| 15               | 8                | 0              | 3.349166                | 2.248529  | 3.144010  |
| 16               | 6                | 0              | 4.174626                | 3.109850  | 3.911487  |
| 17               | 8                | 0              | 5.230041                | 2.338051  | 4.462329  |
| 18               | 8                | 0              | 0.906052                | 0.025515  | 3.435676  |
| 19               | 15               | 0              | 4.041677                | -0.176804 | -0.782535 |
| 20               | 15               | 0              | 4.142125                | -2.702462 | 1.522538  |
| 21               | 1                | 0              | -0.939039               | -0.057000 | -0.555106 |
| 22               | 1                | 0              | 1.270513                | -0.016594 | -1.714294 |
| 23               | 1                | 0              | 6.868345                | 0.076492  | 4.637989  |
| 24               | 1                | 0              | 6.249901                | -2.014148 | 3.425383  |
| 25               | 1                | 0              | -0.796739               | -0.961078 | 4.059494  |
| 26               | 1                | 0              | -0.864445               | 0.844355  | 4.109509  |
| 27               | 1                | 0              | 3.585042                | 3.558106  | 4.720985  |
| 28               | 1                | 0              | 4.594890                | 3.892331  | 3.258682  |
| 29               | 29               | 0              | 4.747947                | -2.261204 | -0.554653 |
| 30               | 6                | 0              | 5.182568                | -3.978961 | 2.319725  |
| 31               | 6                | 0              | 4.944484                | -4.514116 | 3.589419  |
| 32               | 6                | 0              | 6.294661                | -4.407926 | 1.591839  |
| 33               | 6                | 0              | 5.815234                | -5.454061 | 4.125922  |
| 34               | 1                | 0              | 4.073503                | -4.198652 | 4.162047  |
| 35               | 6                | 0              | 7.171651                | -5.342448 | 2.134848  |
| 36               | 1                | 0              | 6.437650                | -4.009260 | 0.584928  |
| 37               | 6                | 0              | 6.932584                | -5.864718 | 3.400869  |
| 38               | 1                | 0              | 5.623555                | -5.869886 | 5.112762  |
| 39               | 1                | 0              | 8.035988                | -5.668713 | 1.561050  |
| 40               | 1                | 0              | 7.613485                | -6.600194 | 3.824023  |
| 41               | 6                | 0              | 2.420624                | -3.142756 | 1.945305  |
| 42               | 6                | 0              | 1.603482                | -3.641984 | 0.927111  |
| 43               | 6                | 0              | 1.891721                | -2.995720 | 3.231278  |
| 44               | 6                | 0              | 0.282124                | -3.988758 | 1.190455  |
| 45               | 1                | 0              | 2.006544                | -3.744349 | -0.081127 |
| 46               | 6                | 0              | 0.575408                | -3.354334 | 3.497152  |
| 47               | 1                | 0              | 2.503819                | -2.560975 | 4.021383  |
| 48               | 6                | 0              | -0.232587               | -3.848183 | 2.475299  |
| 49               | 1                | 0              | -0.347740               | -4.367263 | 0.388906  |
| 50               | 1                | 0              | 0.177688                | -3.245240 | 4.504928  |
| 51               | 1                | 0              | -1.265338               | -4.120998 | 2.681166  |
| 52               | 6                | 0              | 3.648806                | 0.264696  | -2.513101 |
| 53               | 6                | 0              | 3.235388                | 1.533010  | -2.933115 |
| 54               | 6                | 0              | 3.785606                | -0.758250 | -3.453977 |
| 55               | 6                | 0              | 2.954286                | 1.768243  | -4.272756 |
| 56               | 1                | 0              | 3.132051                | 2.340794  | -2.209921 |
| 57               | 6                | 0              | 3.497133                | -0.523004 | -4.795328 |
| 58               | 1                | 0              | 4.146181                | -1.730684 | -3.111358 |
| 59               | 6                | 0              | 3.082499                | 0.738738  | -5.204277 |

|    |   |   |          |           |           |
|----|---|---|----------|-----------|-----------|
| 60 | 1 | 0 | 2.635979 | 2.757457  | -4.594579 |
| 61 | 1 | 0 | 3.608302 | -1.325438 | -5.520853 |
| 62 | 1 | 0 | 2.863199 | 0.927222  | -6.253112 |
| 63 | 6 | 0 | 5.045064 | 1.206671  | -0.135545 |
| 64 | 6 | 0 | 6.405925 | 0.974238  | 0.082772  |
| 65 | 6 | 0 | 4.513725 | 2.466463  | 0.156873  |
| 66 | 6 | 0 | 7.222120 | 1.982244  | 0.585617  |
| 67 | 1 | 0 | 6.822039 | -0.011324 | -0.129714 |
| 68 | 6 | 0 | 5.333376 | 3.478979  | 0.642211  |
| 69 | 1 | 0 | 3.444562 | 2.644442  | 0.042444  |
| 70 | 6 | 0 | 6.687435 | 3.236433  | 0.862265  |
| 71 | 1 | 0 | 8.277120 | 1.786916  | 0.762495  |
| 72 | 1 | 0 | 4.912271 | 4.460986  | 0.852177  |
| 73 | 1 | 0 | 7.325857 | 4.026446  | 1.251813  |
| 74 | 1 | 0 | 5.506487 | -3.154395 | -1.567067 |

Zero-point correction= 0.566456 (Hartree/Particle)  
Thermal correction to Gibbs Free Energy= 0.496123  
Sum of electronic and zero-point Energies= -4087.413591  
SCF- Energy:M06 (PCM, toluene)/6-31G(d, p) = -4088.003977 (a.u.)

## H<sub>2</sub>:

Standard orientation:

| Center Number | Atomic Number | Atomic Type | Coordinates (Angstroms) |          |           |
|---------------|---------------|-------------|-------------------------|----------|-----------|
|               |               |             | X                       | Y        | Z         |
| 1             | 1             | 0           | 0.000000                | 0.000000 | 0.370365  |
| 2             | 1             | 0           | 0.000000                | 0.000000 | -0.370365 |

Zero-point correction= 0.010096 (Hartree/Particle)  
Thermal correction to Gibbs Free Energy= -0.001386  
Sum of electronic and zero-point Energies= -1.159205  
SCF- Energy:M06 (PCM, toluene)/6-31G(d, p) = -1.1693618 (a.u.)

## 2:

Standard orientation:

| Center Number | Atomic Number | Atomic Type | Coordinates (Angstroms) |           |           |
|---------------|---------------|-------------|-------------------------|-----------|-----------|
|               |               |             | X                       | Y         | Z         |
| 1             | 6             | 0           | -0.430884               | 1.593204  | -0.127886 |
| 2             | 6             | 0           | 0.903845                | 1.016622  | -0.550644 |
| 3             | 6             | 0           | -1.532085               | 0.631771  | 0.019026  |
| 4             | 6             | 0           | -1.356639               | -0.696521 | -0.094108 |
| 5             | 6             | 0           | -0.003819               | -1.287947 | -0.367121 |
| 6             | 6             | 0           | 1.175380                | -0.382808 | 0.008016  |
| 7             | 8             | 0           | -0.592631               | 2.789754  | 0.037713  |
| 8             | 6             | 0           | 2.457336                | -0.941660 | -0.597516 |
| 9             | 6             | 0           | 1.331035                | -0.320480 | 1.527936  |
| 10            | 1             | 0           | 1.691819                | 1.727397  | -0.270060 |
| 11            | 1             | 0           | 0.894374                | 0.968368  | -1.652865 |
| 12            | 1             | 0           | 0.048872                | -1.532358 | -1.443507 |
| 13            | 1             | 0           | 0.086838                | -2.255891 | 0.152862  |
| 14            | 1             | 0           | -2.513628               | 1.058687  | 0.223424  |
| 15            | 6             | 0           | -2.486441               | -1.662968 | 0.021273  |
| 16            | 1             | 0           | -2.333922               | -2.335579 | 0.876281  |
| 17            | 1             | 0           | -3.450416               | -1.159927 | 0.141754  |
| 18            | 1             | 0           | -2.536827               | -2.305420 | -0.868661 |
| 19            | 1             | 0           | 3.319839                | -0.316737 | -0.332685 |
| 20            | 1             | 0           | 2.396780                | -0.985529 | -1.692867 |
| 21            | 1             | 0           | 2.654115                | -1.957419 | -0.228971 |
| 22            | 1             | 0           | 0.425432                | 0.051318  | 2.021159  |
| 23            | 1             | 0           | 2.158754                | 0.345335  | 1.802907  |
| 24            | 1             | 0           | 1.552647                | -1.315551 | 1.935673  |

Zero-point correction= 0.210174 (Hartree/Particle)  
Thermal correction to Gibbs Free Energy= 0.17545

Sum of electronic and zero-point Energies= -426.099915  
SCF- Energy:M06 (PCM, toluene)/6-31G(d, p) = -426.3167695 (a.u.)

**R-out-COM1:**

Standard orientation:

| Center<br>Number | Atomic<br>Number | Atomic<br>Type | Coordinates (Angstroms) |           |           |
|------------------|------------------|----------------|-------------------------|-----------|-----------|
|                  |                  |                | X                       | Y         | Z         |
| 1                | 1                | 0              | -1.112878               | 0.785457  | -2.378739 |
| 2                | 6                | 0              | 1.881562                | -2.520879 | -3.102500 |
| 3                | 6                | 0              | 3.036262                | -2.099965 | -2.490590 |
| 4                | 6                | 0              | 3.015899                | -1.506870 | -1.235487 |
| 5                | 6                | 0              | 1.854625                | -1.268585 | -0.528872 |
| 6                | 6                | 0              | 0.648137                | -1.698509 | -1.149311 |
| 7                | 6                | 0              | 0.686236                | -2.306696 | -2.401923 |
| 8                | 6                | 0              | 1.962085                | -0.691925 | 0.836316  |
| 9                | 6                | 0              | 2.473631                | -1.487366 | 1.839788  |
| 10               | 6                | 0              | 2.630674                | -1.056180 | 3.149749  |
| 11               | 6                | 0              | 2.320251                | 0.227884  | 3.522465  |
| 12               | 6                | 0              | 1.824403                | 1.070186  | 2.516720  |
| 13               | 6                | 0              | 1.632788                | 0.642283  | 1.204794  |
| 14               | 8                | 0              | 4.324864                | -2.214981 | -2.918929 |
| 15               | 6                | 0              | 5.100979                | -1.484559 | -1.981489 |
| 16               | 8                | 0              | 2.888494                | -2.782009 | 1.735619  |
| 17               | 6                | 0              | 3.188395                | -3.204384 | 3.054973  |
| 18               | 8                | 0              | 3.138158                | -2.068619 | 3.905520  |
| 19               | 8                | 0              | 4.294528                | -1.240503 | -0.841415 |
| 20               | 15               | 0              | -0.939888               | -1.261717 | -0.327622 |
| 21               | 15               | 0              | 0.887086                | 1.716867  | -0.087659 |
| 22               | 1                | 0              | 1.894892                | -3.001765 | -4.075589 |
| 23               | 1                | 0              | -0.240756               | -2.635745 | -2.862765 |
| 24               | 1                | 0              | 2.453139                | 0.575430  | 4.542347  |
| 25               | 1                | 0              | 1.579775                | 2.093470  | 2.786454  |
| 26               | 1                | 0              | 5.403444                | -0.521236 | -2.427084 |
| 27               | 1                | 0              | 5.977283                | -2.075437 | -1.691868 |
| 28               | 1                | 0              | 4.195169                | -3.639468 | 3.081841  |
| 29               | 1                | 0              | 2.435201                | -3.938387 | 3.384876  |
| 30               | 29               | 0              | -1.160666               | 1.010825  | -0.831495 |
| 31               | 6                | 0              | 0.864880                | 3.392523  | 0.649865  |
| 32               | 6                | 0              | 1.559823                | 4.465137  | 0.084493  |
| 33               | 6                | 0              | 0.028881                | 3.631651  | 1.752287  |
| 34               | 6                | 0              | 1.440731                | 5.744328  | 0.621173  |
| 35               | 1                | 0              | 2.200709                | 4.303132  | -0.779671 |
| 36               | 6                | 0              | -0.074515               | 4.908131  | 2.292077  |
| 37               | 1                | 0              | -0.567296               | 2.824138  | 2.182229  |
| 38               | 6                | 0              | 0.630962                | 5.968068  | 1.728381  |
| 39               | 1                | 0              | 1.987030                | 6.568871  | 0.168286  |
| 40               | 1                | 0              | -0.722052               | 5.073186  | 3.150066  |
| 41               | 1                | 0              | 0.541430                | 6.967855  | 2.147335  |
| 42               | 6                | 0              | 2.237487                | 1.800936  | -1.322404 |
| 43               | 6                | 0              | 1.930925                | 1.690654  | -2.679516 |
| 44               | 6                | 0              | 3.568458                | 1.969912  | -0.925381 |
| 45               | 6                | 0              | 2.946284                | 1.749804  | -3.630861 |
| 46               | 1                | 0              | 0.891061                | 1.530372  | -2.970732 |
| 47               | 6                | 0              | 4.578402                | 2.040200  | -1.876462 |
| 48               | 1                | 0              | 3.809769                | 2.041107  | 0.135243  |
| 49               | 6                | 0              | 4.266984                | 1.928663  | -3.231415 |
| 50               | 1                | 0              | 2.703977                | 1.654342  | -4.686835 |
| 51               | 1                | 0              | 5.611435                | 2.178010  | -1.562643 |
| 52               | 1                | 0              | 5.058478                | 1.981144  | -3.976729 |
| 53               | 6                | 0              | -2.222618               | -2.276719 | -1.167571 |
| 54               | 6                | 0              | -2.980772               | -3.235848 | -0.488585 |
| 55               | 6                | 0              | -2.554438               | -1.981737 | -2.499120 |
| 56               | 6                | 0              | -4.023740               | -3.900570 | -1.129578 |
| 57               | 1                | 0              | -2.761190               | -3.465893 | 0.551751  |
| 58               | 6                | 0              | -3.585431               | -2.657849 | -3.140449 |
| 59               | 1                | 0              | -2.015335               | -1.187343 | -3.017008 |
| 60               | 6                | 0              | -4.322926               | -3.622068 | -2.457952 |

|     |   |   |           |           |           |
|-----|---|---|-----------|-----------|-----------|
| 61  | 1 | 0 | -4.602201 | -4.642307 | -0.583203 |
| 62  | 1 | 0 | -3.822791 | -2.419015 | -4.174789 |
| 63  | 1 | 0 | -5.134877 | -4.145492 | -2.957654 |
| 64  | 6 | 0 | -0.760751 | -2.084173 | 1.304684  |
| 65  | 6 | 0 | -1.025386 | -1.352653 | 2.464694  |
| 66  | 6 | 0 | -0.322715 | -3.409426 | 1.417699  |
| 67  | 6 | 0 | -0.861335 | -1.937497 | 3.717688  |
| 68  | 1 | 0 | -1.342342 | -0.311495 | 2.397695  |
| 69  | 6 | 0 | -0.174902 | -3.996788 | 2.668104  |
| 70  | 1 | 0 | -0.088551 | -3.979681 | 0.518503  |
| 71  | 6 | 0 | -0.441724 | -3.259096 | 3.821562  |
| 72  | 1 | 0 | -1.061495 | -1.349630 | 4.610822  |
| 73  | 1 | 0 | 0.154188  | -5.031907 | 2.744919  |
| 74  | 1 | 0 | -0.315681 | -3.716221 | 4.801085  |
| 75  | 6 | 0 | -3.016426 | 1.410793  | 1.367151  |
| 76  | 6 | 0 | -4.066913 | 0.360629  | 1.074105  |
| 77  | 6 | 0 | -2.485060 | 2.140972  | 0.223358  |
| 78  | 6 | 0 | -2.963159 | 1.966490  | -1.084481 |
| 79  | 6 | 0 | -4.118375 | 1.018660  | -1.342347 |
| 80  | 6 | 0 | -4.978933 | 0.732844  | -0.100534 |
| 81  | 8 | 0 | -2.645358 | 1.631216  | 2.519145  |
| 82  | 6 | 0 | -5.925988 | -0.423918 | -0.398659 |
| 83  | 6 | 0 | -5.801304 | 1.971553  | 0.258999  |
| 84  | 1 | 0 | -4.642003 | 0.198974  | 1.995943  |
| 85  | 1 | 0 | -3.552876 | -0.590831 | 0.855300  |
| 86  | 1 | 0 | -3.761987 | 0.068632  | -1.761782 |
| 87  | 1 | 0 | -4.761542 | 1.457486  | -2.122782 |
| 88  | 1 | 0 | -1.954095 | 3.061566  | 0.466537  |
| 89  | 6 | 0 | -2.825561 | 3.103512  | -2.055768 |
| 90  | 1 | 0 | -3.706938 | 3.760387  | -1.963782 |
| 91  | 1 | 0 | -1.929109 | 3.703890  | -1.858830 |
| 92  | 1 | 0 | -2.777127 | 2.747171  | -3.089574 |
| 93  | 1 | 0 | -6.580735 | -0.624377 | 0.460063  |
| 94  | 1 | 0 | -5.374750 | -1.346926 | -0.626626 |
| 95  | 1 | 0 | -6.566279 | -0.190647 | -1.260259 |
| 96  | 1 | 0 | -5.168050 | 2.848608  | 0.444498  |
| 97  | 1 | 0 | -6.398111 | 1.794693  | 1.163443  |
| 98  | 1 | 0 | -6.492989 | 2.224089  | -0.555686 |
| 99  | 1 | 0 | -0.568718 | 1.315938  | 4.774372  |
| 100 | 1 | 0 | -1.089025 | 1.484540  | 4.264866  |

Zero-point correction= 0.795678 (Hartree/Particle)

Thermal correction to Gibbs Free Energy= 0.714736

Sum of electronic and zero-point Energies= -4514.721998

SCF- Energy:M06 (PCM, toluene)/6-31G(d, p) = -4515.54048 (a.u.)

#### R-out-TS1:

Standard orientation:

| Center Number | Atomic Number | Atomic Type | Coordinates (Angstroms) |           |           |
|---------------|---------------|-------------|-------------------------|-----------|-----------|
|               |               |             | X                       | Y         | Z         |
| 1             | 1             | 0           | -1.709569               | 1.123423  | -1.978118 |
| 2             | 6             | 0           | 1.995394                | -2.477976 | -3.091294 |
| 3             | 6             | 0           | 3.134195                | -1.981024 | -2.507474 |
| 4             | 6             | 0           | 3.102684                | -1.380132 | -1.255746 |
| 5             | 6             | 0           | 1.943901                | -1.200399 | -0.528442 |
| 6             | 6             | 0           | 0.751420                | -1.697160 | -1.126182 |
| 7             | 6             | 0           | 0.802088                | -2.321224 | -2.371002 |
| 8             | 6             | 0           | 2.063750                | -0.604823 | 0.829703  |
| 9             | 6             | 0           | 2.631702                | -1.373474 | 1.824193  |
| 10            | 6             | 0           | 2.862926                | -0.908569 | 3.112297  |
| 11            | 6             | 0           | 2.562557                | 0.382174  | 3.471679  |
| 12            | 6             | 0           | 1.994918                | 1.192276  | 2.477574  |
| 13            | 6             | 0           | 1.735542                | 0.732080  | 1.188427  |
| 14            | 8             | 0           | 4.418519                | -2.022484 | -2.960191 |
| 15            | 6             | 0           | 5.170002                | -1.244141 | -2.040961 |
| 16            | 8             | 0           | 3.067040                | -2.662035 | 1.723266  |
| 17            | 6             | 0           | 3.380762                | -3.061273 | 3.047156  |

|    |    |   |           |           |           |
|----|----|---|-----------|-----------|-----------|
| 18 | 8  | 0 | 3.439640  | -1.894592 | 3.854112  |
| 19 | 8  | 0 | 4.370743  | -1.037762 | -0.887687 |
| 20 | 15 | 0 | -0.844311 | -1.319258 | -0.293601 |
| 21 | 15 | 0 | 0.848867  | 1.753158  | -0.054829 |
| 22 | 1  | 0 | 2.019133  | -2.971660 | -4.057755 |
| 23 | 1  | 0 | -0.113597 | -2.709152 | -2.808573 |
| 24 | 1  | 0 | 2.755423  | 0.757298  | 4.471884  |
| 25 | 1  | 0 | 1.747345  | 2.218017  | 2.736894  |
| 26 | 1  | 0 | 5.407631  | -0.267803 | -2.498026 |
| 27 | 1  | 0 | 6.082182  | -1.783817 | -1.763375 |
| 28 | 1  | 0 | 4.353882  | -3.564462 | 3.058280  |
| 29 | 1  | 0 | 2.584996  | -3.726943 | 3.423558  |
| 30 | 29 | 0 | -1.174637 | 0.897582  | -0.515951 |
| 31 | 6  | 0 | 0.808549  | 3.440170  | 0.651101  |
| 32 | 6  | 0 | 1.447213  | 4.524635  | 0.044959  |
| 33 | 6  | 0 | 0.005599  | 3.669485  | 1.779072  |
| 34 | 6  | 0 | 1.300322  | 5.808529  | 0.563249  |
| 35 | 1  | 0 | 2.062735  | 4.369607  | -0.838598 |
| 36 | 6  | 0 | -0.126836 | 4.950592  | 2.300311  |
| 37 | 1  | 0 | -0.527701 | 2.842243  | 2.249285  |
| 38 | 6  | 0 | 0.518870  | 6.024029  | 1.692230  |
| 39 | 1  | 0 | 1.802373  | 6.643255  | 0.078888  |
| 40 | 1  | 0 | -0.747752 | 5.109481  | 3.178672  |
| 41 | 1  | 0 | 0.406630  | 7.027717  | 2.095917  |
| 42 | 6  | 0 | 2.065585  | 1.858096  | -1.419413 |
| 43 | 6  | 0 | 1.609597  | 1.711265  | -2.730408 |
| 44 | 6  | 0 | 3.428625  | 2.063114  | -1.182749 |
| 45 | 6  | 0 | 2.505674  | 1.756839  | -3.794254 |
| 46 | 1  | 0 | 0.544833  | 1.542429  | -2.901455 |
| 47 | 6  | 0 | 4.320291  | 2.126513  | -2.247185 |
| 48 | 1  | 0 | 3.789683  | 2.161684  | -0.158848 |
| 49 | 6  | 0 | 3.859643  | 1.965498  | -3.553829 |
| 50 | 1  | 0 | 2.144939  | 1.629355  | -4.812255 |
| 51 | 1  | 0 | 5.378870  | 2.297379  | -2.058450 |
| 52 | 1  | 0 | 4.560833  | 2.004686  | -4.385040 |
| 53 | 6  | 0 | -2.094081 | -2.356728 | -1.147496 |
| 54 | 6  | 0 | -2.801041 | -3.370885 | -0.496498 |
| 55 | 6  | 0 | -2.445921 | -2.029179 | -2.464949 |
| 56 | 6  | 0 | -3.821736 | -4.053997 | -1.153732 |
| 57 | 1  | 0 | -2.559932 | -3.625060 | 0.533576  |
| 58 | 6  | 0 | -3.451903 | -2.723963 | -3.124642 |
| 59 | 1  | 0 | -1.938776 | -1.201388 | -2.962886 |
| 60 | 6  | 0 | -4.143229 | -3.740401 | -2.469062 |
| 61 | 1  | 0 | -4.365605 | -4.837796 | -0.631300 |
| 62 | 1  | 0 | -3.707528 | -2.460605 | -4.148483 |
| 63 | 1  | 0 | -4.938734 | -4.277458 | -2.980440 |
| 64 | 6  | 0 | -0.648305 | -2.121772 | 1.338225  |
| 65 | 6  | 0 | -1.026457 | -1.419993 | 2.485040  |
| 66 | 6  | 0 | -0.107992 | -3.407157 | 1.461335  |
| 67 | 6  | 0 | -0.860206 | -1.996441 | 3.741741  |
| 68 | 1  | 0 | -1.444213 | -0.415496 | 2.406455  |
| 69 | 6  | 0 | 0.042359  | -3.985275 | 2.715580  |
| 70 | 1  | 0 | 0.200989  | -3.951375 | 0.568543  |
| 71 | 6  | 0 | -0.326732 | -3.275200 | 3.858340  |
| 72 | 1  | 0 | -1.150579 | -1.435319 | 4.627059  |
| 73 | 1  | 0 | 0.451374  | -4.990488 | 2.804677  |
| 74 | 1  | 0 | -0.200107 | -3.725108 | 4.841173  |
| 75 | 6  | 0 | -3.326084 | 1.110216  | 1.460405  |
| 76 | 6  | 0 | -4.354515 | 0.115455  | 0.954146  |
| 77 | 6  | 0 | -2.643180 | 1.900096  | 0.461588  |
| 78 | 6  | 0 | -2.952807 | 1.851035  | -0.942813 |
| 79 | 6  | 0 | -4.105213 | 0.946798  | -1.378198 |
| 80 | 6  | 0 | -5.119083 | 0.631234  | -0.269973 |
| 81 | 8  | 0 | -3.128731 | 1.237685  | 2.671509  |
| 82 | 6  | 0 | -6.073023 | -0.448061 | -0.771521 |
| 83 | 6  | 0 | -5.926712 | 1.874874  | 0.101425  |
| 84 | 1  | 0 | -5.034266 | -0.107126 | 1.787757  |
| 85 | 1  | 0 | -3.847290 | -0.830557 | 0.696485  |
| 86 | 1  | 0 | -3.724381 | -0.007860 | -1.759967 |

|     |   |   |           |           |           |
|-----|---|---|-----------|-----------|-----------|
| 87  | 1 | 0 | -4.625997 | 1.420606  | -2.226241 |
| 88  | 1 | 0 | -2.186633 | 2.815937  | 0.840570  |
| 89  | 6 | 0 | -2.876814 | 3.176679  | -1.661138 |
| 90  | 1 | 0 | -3.758705 | 3.778936  | -1.391712 |
| 91  | 1 | 0 | -1.981475 | 3.740870  | -1.371838 |
| 92  | 1 | 0 | -2.865759 | 3.053122  | -2.749952 |
| 93  | 1 | 0 | -6.817706 | -0.696854 | -0.003803 |
| 94  | 1 | 0 | -5.532998 | -1.369692 | -1.031440 |
| 95  | 1 | 0 | -6.614140 | -0.110406 | -1.666320 |
| 96  | 1 | 0 | -5.286846 | 2.687196  | 0.467263  |
| 97  | 1 | 0 | -6.654784 | 1.644104  | 0.890301  |
| 98  | 1 | 0 | -6.481667 | 2.248473  | -0.770112 |
| 99  | 1 | 0 | -1.211040 | 1.378781  | 4.029126  |
| 100 | 1 | 0 | -0.481429 | 1.272323  | 4.164709  |

Zero-point correction= 0.796826 (Hartree/Particle)  
 Thermal correction to Gibbs Free Energy= 0.716579  
 Sum of electronic and zero-point Energies= -4514.714205  
 SCF- Energy:M06 (PCM, toluene)/6-31G(d, p) = -4515.535035 (a.u.)

**R-out-TS2:**

Standard orientation:

| Center Number | Atomic Number | Atomic Type | Coordinates (Angstroms) |           |           |
|---------------|---------------|-------------|-------------------------|-----------|-----------|
|               |               |             | X                       | Y         | Z         |
| 1             | 6             | 0           | -2.281635               | -1.678226 | 3.330544  |
| 2             | 6             | 0           | -3.332354               | -0.965588 | 2.807613  |
| 3             | 6             | 0           | -3.305086               | -0.486526 | 1.504942  |
| 4             | 6             | 0           | -2.233965               | -0.658816 | 0.652135  |
| 5             | 6             | 0           | -1.129776               | -1.383581 | 1.181926  |
| 6             | 6             | 0           | -1.182976               | -1.880706 | 2.484251  |
| 7             | 6             | 0           | -2.378285               | -0.132714 | -0.734267 |
| 8             | 6             | 0           | -3.196486               | -0.811778 | -1.611143 |
| 9             | 6             | 0           | -3.507144               | -0.343542 | -2.883638 |
| 10            | 6             | 0           | -3.044532               | 0.867373  | -3.336103 |
| 11            | 6             | 0           | -2.204095               | 1.579951  | -2.468808 |
| 12            | 6             | 0           | -1.860663               | 1.107888  | -1.205152 |
| 13            | 8             | 0           | -4.512948               | -0.629886 | 3.394435  |
| 14            | 6             | 0           | -5.217840               | 0.153593  | 2.442039  |
| 15            | 8             | 0           | -3.860327               | -1.985886 | -1.391580 |
| 16            | 6             | 0           | -4.311675               | -2.383894 | -2.675239 |
| 17            | 8             | 0           | -4.348402               | -1.226696 | -3.494616 |
| 18            | 8             | 0           | -4.478085               | 0.153658  | 1.233510  |
| 19            | 15            | 0           | 0.377120                | -1.563693 | 0.150545  |
| 20            | 15            | 0           | -0.502472               | 1.860361  | -0.233992 |
| 21            | 1             | 0           | -2.304371               | -2.068156 | 4.343263  |
| 22            | 1             | 0           | -0.339465               | -2.446397 | 2.870255  |
| 23            | 1             | 0           | -3.307815               | 1.246872  | -4.318340 |
| 24            | 1             | 0           | -1.792887               | 2.526923  | -2.810194 |
| 25            | 1             | 0           | -5.309834               | 1.185583  | 2.815109  |
| 26            | 1             | 0           | -6.209464               | -0.284046 | 2.268203  |
| 27            | 1             | 0           | -5.316130               | -2.810074 | -2.595318 |
| 28            | 1             | 0           | -3.598218               | -3.113946 | -3.097652 |
| 29            | 29            | 0           | 1.095505                | 0.365930  | -0.636606 |
| 30            | 6             | 0           | -0.169555               | 3.503792  | -0.961119 |
| 31            | 6             | 0           | -0.374287               | 4.699041  | -0.267396 |
| 32            | 6             | 0           | 0.472437                | 3.546571  | -2.208336 |
| 33            | 6             | 0           | 0.034779                | 5.911475  | -0.815661 |
| 34            | 1             | 0           | -0.849504               | 4.686591  | 0.711422  |
| 35            | 6             | 0           | 0.865734                | 4.759764  | -2.758624 |
| 36            | 1             | 0           | 0.668232                | 2.614540  | -2.740339 |
| 37            | 6             | 0           | 0.649504                | 5.946269  | -2.062071 |
| 38            | 1             | 0           | -0.128927               | 6.833699  | -0.262405 |
| 39            | 1             | 0           | 1.355385                | 4.776752  | -3.729571 |
| 40            | 1             | 0           | 0.969140                | 6.894892  | -2.487346 |
| 41            | 6             | 0           | -1.300594               | 2.237717  | 1.367491  |
| 42            | 6             | 0           | -0.618603               | 1.955059  | 2.551815  |
| 43            | 6             | 0           | -2.587172               | 2.782715  | 1.434536  |

|     |   |   |           |           |           |
|-----|---|---|-----------|-----------|-----------|
| 44  | 6 | 0 | -1.216527 | 2.197871  | 3.785121  |
| 45  | 1 | 0 | 0.380424  | 1.521222  | 2.502138  |
| 46  | 6 | 0 | -3.179028 | 3.040495  | 2.665637  |
| 47  | 1 | 0 | -3.128085 | 2.995246  | 0.512212  |
| 48  | 6 | 0 | -2.497033 | 2.738686  | 3.842823  |
| 49  | 1 | 0 | -0.682745 | 1.961688  | 4.702734  |
| 50  | 1 | 0 | -4.175474 | 3.477315  | 2.708209  |
| 51  | 1 | 0 | -2.964109 | 2.928451  | 4.806780  |
| 52  | 6 | 0 | 1.547982  | -2.434524 | 1.254742  |
| 53  | 6 | 0 | 1.991716  | -3.737887 | 1.026538  |
| 54  | 6 | 0 | 2.088837  | -1.713349 | 2.327346  |
| 55  | 6 | 0 | 2.957448  | -4.306814 | 1.854340  |
| 56  | 1 | 0 | 1.587282  | -4.310459 | 0.193765  |
| 57  | 6 | 0 | 3.034363  | -2.288785 | 3.165054  |
| 58  | 1 | 0 | 1.759098  | -0.687498 | 2.502677  |
| 59  | 6 | 0 | 3.476699  | -3.589188 | 2.925058  |
| 60  | 1 | 0 | 3.301267  | -5.320262 | 1.660093  |
| 61  | 1 | 0 | 3.442871  | -1.715490 | 3.994915  |
| 62  | 1 | 0 | 4.229431  | -4.036521 | 3.569996  |
| 63  | 6 | 0 | -0.070602 | -2.831312 | -1.083355 |
| 64  | 6 | 0 | 0.780604  | -2.987233 | -2.183273 |
| 65  | 6 | 0 | -1.185228 | -3.660366 | -0.944553 |
| 66  | 6 | 0 | 0.510786  | -3.964236 | -3.135126 |
| 67  | 1 | 0 | 1.650434  | -2.334840 | -2.292740 |
| 68  | 6 | 0 | -1.458889 | -4.625895 | -1.909375 |
| 69  | 1 | 0 | -1.848793 | -3.540119 | -0.089305 |
| 70  | 6 | 0 | -0.611916 | -4.778019 | -3.003837 |
| 71  | 1 | 0 | 1.174747  | -4.081967 | -3.988165 |
| 72  | 1 | 0 | -2.331700 | -5.267267 | -1.799248 |
| 73  | 1 | 0 | -0.824893 | -5.535109 | -3.755649 |
| 74  | 1 | 0 | 1.893059  | -0.051797 | -2.554138 |
| 75  | 1 | 0 | 0.932099  | 0.227806  | -2.377289 |
| 76  | 1 | 0 | 2.754421  | 2.083813  | 1.126642  |
| 77  | 6 | 0 | 3.443632  | 0.030394  | -1.355929 |
| 78  | 6 | 0 | 4.405035  | -0.844977 | -0.595849 |
| 79  | 6 | 0 | 2.993609  | 1.241013  | -0.833626 |
| 80  | 6 | 0 | 3.576686  | 1.858137  | 0.422730  |
| 81  | 6 | 0 | 4.520811  | 0.900190  | 1.166009  |
| 82  | 6 | 0 | 5.359414  | -0.039836 | 0.290638  |
| 83  | 8 | 0 | 3.064604  | -0.412414 | -2.523273 |
| 84  | 6 | 0 | 6.144584  | -0.987400 | 1.192400  |
| 85  | 6 | 0 | 6.350375  | 0.723780  | -0.588788 |
| 86  | 1 | 0 | 4.963258  | -1.434630 | -1.337113 |
| 87  | 1 | 0 | 3.843612  | -1.572761 | 0.014708  |
| 88  | 1 | 0 | 3.922101  | 0.258780  | 1.832147  |
| 89  | 1 | 0 | 5.188572  | 1.481287  | 1.822819  |
| 90  | 1 | 0 | 2.677004  | 1.974511  | -1.580707 |
| 91  | 6 | 0 | 4.197881  | 3.218530  | 0.103116  |
| 92  | 1 | 0 | 5.015396  | 3.143760  | -0.622889 |
| 93  | 1 | 0 | 3.436872  | 3.883703  | -0.329151 |
| 94  | 1 | 0 | 4.589736  | 3.700272  | 1.008478  |
| 95  | 1 | 0 | 6.729917  | -1.699688 | 0.594985  |
| 96  | 1 | 0 | 5.475860  | -1.565713 | 1.844796  |
| 97  | 1 | 0 | 6.845658  | -0.430155 | 1.829191  |
| 98  | 1 | 0 | 5.844742  | 1.308605  | -1.365222 |
| 99  | 1 | 0 | 7.027723  | 0.022471  | -1.094700 |
| 100 | 1 | 0 | 6.964156  | 1.409233  | 0.011951  |

-----  
Zero-point correction= 0.798826 (Hartree/Particle)

Thermal correction to Gibbs Free Energy= 0.718763

Sum of electronic and zero-point Energies= -4514.718754

SCF- Energy:M06 (PCM, toluene)/6-31G(d, p) = -4515.541149 (a.u.)

**S-out-COM1:**

Standard orientation:

-----  
Center Atomic Atomic Coordinates (Angstroms)  
Number Number Type X Y Z  
-----



|    |    |   |           |           |           |
|----|----|---|-----------|-----------|-----------|
| 1  | 1  | 0 | 1.602130  | 0.525639  | -2.348934 |
| 2  | 6  | 0 | -3.725222 | 0.006384  | -2.746661 |
| 3  | 6  | 0 | -4.011661 | -1.102761 | -1.989449 |
| 4  | 6  | 0 | -3.342507 | -1.365327 | -0.800594 |
| 5  | 6  | 0 | -2.339174 | -0.561170 | -0.304988 |
| 6  | 6  | 0 | -2.031807 | 0.596448  | -1.076963 |
| 7  | 6  | 0 | -2.720588 | 0.854661  | -2.259214 |
| 8  | 6  | 0 | -1.740675 | -0.854060 | 1.023181  |
| 9  | 6  | 0 | -2.527853 | -0.647158 | 2.137946  |
| 10 | 6  | 0 | -2.054337 | -0.755099 | 3.437975  |
| 11 | 6  | 0 | -0.742009 | -1.064768 | 3.698457  |
| 12 | 6  | 0 | 0.080554  | -1.301422 | 2.588586  |
| 13 | 6  | 0 | -0.398080 | -1.255790 | 1.276944  |
| 14 | 8  | 0 | -4.950055 | -2.066887 | -2.204926 |
| 15 | 6  | 0 | -4.728504 | -3.047766 | -1.203726 |
| 16 | 8  | 0 | -3.838058 | -0.271897 | 2.161422  |
| 17 | 6  | 0 | -4.131475 | 0.014571  | 3.519094  |
| 18 | 8  | 0 | -3.060101 | -0.472086 | 4.313113  |
| 19 | 8  | 0 | -3.846520 | -2.500692 | -0.238694 |
| 20 | 15 | 0 | -0.649928 | 1.660593  | -0.494388 |
| 21 | 15 | 0 | 0.755710  | -1.431665 | -0.128820 |
| 22 | 1  | 0 | -4.258341 | 0.220362  | -3.667740 |
| 23 | 1  | 0 | -2.480630 | 1.748920  | -2.828457 |
| 24 | 1  | 0 | -0.352379 | -1.099985 | 4.710961  |
| 25 | 1  | 0 | 1.137512  | -1.480985 | 2.769381  |
| 26 | 1  | 0 | -4.263868 | -3.937372 | -1.660554 |
| 27 | 1  | 0 | -5.680451 | -3.307001 | -0.726129 |
| 28 | 1  | 0 | -5.060738 | -0.489783 | 3.808246  |
| 29 | 1  | 0 | -4.214333 | 1.106880  | 3.647619  |
| 30 | 29 | 0 | 1.426919  | 0.652027  | -0.803292 |
| 31 | 6  | 0 | -0.200699 | -2.400238 | -1.368271 |
| 32 | 6  | 0 | -0.840022 | -3.586854 | -0.995585 |
| 33 | 6  | 0 | -0.224080 | -1.996168 | -2.703135 |
| 34 | 6  | 0 | -1.509800 | -4.349406 | -1.943914 |
| 35 | 1  | 0 | -0.817596 | -3.912285 | 0.044475  |
| 36 | 6  | 0 | -0.901946 | -2.758790 | -3.651065 |
| 37 | 1  | 0 | 0.283300  | -1.071307 | -2.982669 |
| 38 | 6  | 0 | -1.546988 | -3.931720 | -3.273787 |
| 39 | 1  | 0 | -1.999071 | -5.275660 | -1.646959 |
| 40 | 1  | 0 | -0.925090 | -2.433285 | -4.688712 |
| 41 | 1  | 0 | -2.072683 | -4.528006 | -4.016878 |
| 42 | 6  | 0 | 2.004861  | -2.716395 | 0.277924  |
| 43 | 6  | 0 | 2.016423  | -3.577757 | 1.375496  |
| 44 | 6  | 0 | 3.012827  | -2.840382 | -0.688088 |
| 45 | 6  | 0 | 3.038325  | -4.512999 | 1.524238  |
| 46 | 1  | 0 | 1.226039  | -3.527136 | 2.120547  |
| 47 | 6  | 0 | 4.021532  | -3.783843 | -0.546618 |
| 48 | 1  | 0 | 2.995425  | -2.186125 | -1.562593 |
| 49 | 6  | 0 | 4.044770  | -4.614508 | 0.571264  |
| 50 | 1  | 0 | 3.041143  | -5.168992 | 2.391951  |
| 51 | 1  | 0 | 4.794478  | -3.867695 | -1.307909 |
| 52 | 1  | 0 | 4.841233  | -5.344727 | 0.693636  |
| 53 | 6  | 0 | -0.664490 | 3.144816  | -1.569605 |
| 54 | 6  | 0 | -0.822729 | 4.436421  | -1.060329 |
| 55 | 6  | 0 | -0.313086 | 2.989753  | -2.919095 |
| 56 | 6  | 0 | -0.650618 | 5.546650  | -1.884373 |
| 57 | 1  | 0 | -1.073727 | 4.581330  | -0.011613 |
| 58 | 6  | 0 | -0.162605 | 4.097704  | -3.741696 |
| 59 | 1  | 0 | -0.119983 | 1.991761  | -3.312152 |
| 60 | 6  | 0 | -0.327584 | 5.381119  | -3.225663 |
| 61 | 1  | 0 | -0.770744 | 6.545320  | -1.470094 |
| 62 | 1  | 0 | 0.103894  | 3.959352  | -4.787167 |
| 63 | 1  | 0 | -0.194435 | 6.249220  | -3.867188 |
| 64 | 6  | 0 | -1.303409 | 2.276598  | 1.107944  |
| 65 | 6  | 0 | -0.510377 | 2.245480  | 2.258926  |
| 66 | 6  | 0 | -2.615577 | 2.760871  | 1.193917  |
| 67 | 6  | 0 | -1.022473 | 2.707938  | 3.470258  |
| 68 | 1  | 0 | 0.498727  | 1.829376  | 2.243296  |
| 69 | 6  | 0 | -3.118849 | 3.228191  | 2.401304  |

|     |   |   |           |           |           |
|-----|---|---|-----------|-----------|-----------|
| 70  | 1 | 0 | -3.246014 | 2.764088  | 0.304248  |
| 71  | 6 | 0 | -2.318618 | 3.203505  | 3.543842  |
| 72  | 1 | 0 | -0.396348 | 2.671273  | 4.359200  |
| 73  | 1 | 0 | -4.137103 | 3.609555  | 2.453663  |
| 74  | 1 | 0 | -2.711488 | 3.566449  | 4.491673  |
| 75  | 6 | 0 | 2.595683  | 1.658194  | 0.520000  |
| 76  | 6 | 0 | 3.175832  | 1.699875  | -0.759895 |
| 77  | 6 | 0 | 4.384027  | 0.820412  | -1.036873 |
| 78  | 6 | 0 | 3.098677  | 0.815072  | 1.601854  |
| 79  | 6 | 0 | 4.309055  | -0.044323 | 1.301613  |
| 80  | 6 | 0 | 5.224243  | 0.536514  | 0.218137  |
| 81  | 8 | 0 | 2.585462  | 0.812806  | 2.717989  |
| 82  | 1 | 0 | 1.997153  | 2.509006  | 0.851913  |
| 83  | 1 | 0 | 5.015914  | 1.313092  | -1.792995 |
| 84  | 1 | 0 | 4.083336  | -0.136701 | -1.483537 |
| 85  | 1 | 0 | 3.954396  | -1.040507 | 0.989301  |
| 86  | 1 | 0 | 4.848346  | -0.190691 | 2.247549  |
| 87  | 6 | 0 | 3.092847  | 2.965871  | -1.564984 |
| 88  | 1 | 0 | 3.961865  | 3.601340  | -1.325997 |
| 89  | 1 | 0 | 3.113731  | 2.758728  | -2.640291 |
| 90  | 1 | 0 | 2.182035  | 3.539494  | -1.350890 |
| 91  | 6 | 0 | 6.311441  | -0.475123 | -0.124783 |
| 92  | 1 | 0 | 6.975496  | -0.089636 | -0.910288 |
| 93  | 1 | 0 | 6.928908  | -0.700660 | 0.754902  |
| 94  | 1 | 0 | 5.875742  | -1.419306 | -0.478772 |
| 95  | 6 | 0 | 5.882858  | 1.821762  | 0.720983  |
| 96  | 1 | 0 | 6.487868  | 1.622776  | 1.615246  |
| 97  | 1 | 0 | 6.546262  | 2.243364  | -0.046343 |
| 98  | 1 | 0 | 5.144575  | 2.589334  | 0.983833  |
| 99  | 1 | 0 | 1.609352  | 0.897137  | 4.874299  |
| 100 | 1 | 0 | 0.956285  | 0.821516  | 5.228109  |

Zero-point correction= 0.796673 (Hartree/Particle)  
Thermal correction to Gibbs Free Energy= 0.715501  
Sum of electronic and zero-point Energies= -4514.713863  
SCF- Energy:M06 (PCM, toluene)/6-31G(d, p) = -4515.534704 (a.u.)

**S-out-TS1:**

Standard orientation:

| Center Number | Atomic Number | Atomic Type | Coordinates (Angstroms) |           |           |
|---------------|---------------|-------------|-------------------------|-----------|-----------|
|               |               |             | X                       | Y         | Z         |
| 1             | 1             | 0           | 2.128237                | 0.811137  | -2.010455 |
| 2             | 6             | 0           | -3.799418               | 0.476279  | -2.652658 |
| 3             | 6             | 0           | -4.157552               | -0.657788 | -1.965631 |
| 4             | 6             | 0           | -3.499088               | -1.042026 | -0.805699 |
| 5             | 6             | 0           | -2.427615               | -0.353722 | -0.282083 |
| 6             | 6             | 0           | -2.035123               | 0.820528  | -0.986422 |
| 7             | 6             | 0           | -2.722635               | 1.211267  | -2.133409 |
| 8             | 6             | 0           | -1.820566               | -0.780139 | 1.004189  |
| 9             | 6             | 0           | -2.548475               | -0.575550 | 2.160145  |
| 10            | 6             | 0           | -2.034745               | -0.780154 | 3.432623  |
| 11            | 6             | 0           | -0.739869               | -1.198389 | 3.625625  |
| 12            | 6             | 0           | 0.013029                | -1.449872 | 2.472160  |
| 13            | 6             | 0           | -0.510106               | -1.300911 | 1.185457  |
| 14            | 8             | 0           | -5.161603               | -1.539220 | -2.230946 |
| 15            | 6             | 0           | -5.035451               | -2.575655 | -1.268099 |
| 16            | 8             | 0           | -3.824613               | -0.104189 | 2.255458  |
| 17            | 6             | 0           | -4.040751               | 0.142360  | 3.635673  |
| 18            | 8             | 0           | -2.979665               | -0.460962 | 4.360949  |
| 19            | 8             | 0           | -4.077363               | -2.170388 | -0.305414 |
| 20            | 15            | 0           | -0.536794               | 1.698135  | -0.385854 |
| 21            | 15            | 0           | 0.620469                | -1.512411 | -0.236521 |
| 22            | 1             | 0           | -4.327806               | 0.790233  | -3.547422 |
| 23            | 1             | 0           | -2.423266               | 2.119459  | -2.650921 |
| 24            | 1             | 0           | -0.314444               | -1.307433 | 4.618066  |
| 25            | 1             | 0           | 1.054563                | -1.740704 | 2.592455  |
| 26            | 1             | 0           | -4.688761               | -3.496163 | -1.766151 |

|    |    |   |           |           |           |
|----|----|---|-----------|-----------|-----------|
| 27 | 1  | 0 | -6.002837 | -2.740935 | -0.778112 |
| 28 | 1  | 0 | -4.994123 | -0.302327 | 3.943579  |
| 29 | 1  | 0 | -4.035291 | 1.230954  | 3.816350  |
| 30 | 29 | 0 | 1.407356  | 0.536367  | -0.640940 |
| 31 | 6  | 0 | -0.418238 | -2.251095 | -1.560699 |
| 32 | 6  | 0 | -1.230268 | -3.364092 | -1.324952 |
| 33 | 6  | 0 | -0.358705 | -1.706547 | -2.844247 |
| 34 | 6  | 0 | -1.986454 | -3.910026 | -2.354391 |
| 35 | 1  | 0 | -1.283605 | -3.797992 | -0.326904 |
| 36 | 6  | 0 | -1.125191 | -2.247489 | -3.873030 |
| 37 | 1  | 0 | 0.284455  | -0.842938 | -3.023631 |
| 38 | 6  | 0 | -1.943380 | -3.345142 | -3.628346 |
| 39 | 1  | 0 | -2.608840 | -4.782886 | -2.163839 |
| 40 | 1  | 0 | -1.082670 | -1.809262 | -4.867567 |
| 41 | 1  | 0 | -2.541788 | -3.769054 | -4.431971 |
| 42 | 6  | 0 | 1.677813  | -2.956727 | 0.170561  |
| 43 | 6  | 0 | 1.359302  | -3.960221 | 1.089849  |
| 44 | 6  | 0 | 2.845854  | -3.084331 | -0.587509 |
| 45 | 6  | 0 | 2.210213  | -5.045508 | 1.269986  |
| 46 | 1  | 0 | 0.450899  | -3.886626 | 1.684607  |
| 47 | 6  | 0 | 3.693703  | -4.172530 | -0.412358 |
| 48 | 1  | 0 | 3.087154  | -2.318027 | -1.326625 |
| 49 | 6  | 0 | 3.381169  | -5.151363 | 0.525413  |
| 50 | 1  | 0 | 1.956088  | -5.813107 | 1.997571  |
| 51 | 1  | 0 | 4.601153  | -4.252583 | -1.006724 |
| 52 | 1  | 0 | 4.047368  | -5.997991 | 0.673584  |
| 53 | 6  | 0 | -0.439414 | 3.234249  | -1.377434 |
| 54 | 6  | 0 | -0.481482 | 4.506471  | -0.802766 |
| 55 | 6  | 0 | -0.131006 | 3.118868  | -2.740900 |
| 56 | 6  | 0 | -0.234182 | 5.638574  | -1.576185 |
| 57 | 1  | 0 | -0.698006 | 4.616846  | 0.257711  |
| 58 | 6  | 0 | 0.095104  | 4.249605  | -3.513509 |
| 59 | 1  | 0 | -0.042323 | 2.128917  | -3.189212 |
| 60 | 6  | 0 | 0.048569  | 5.514565  | -2.930819 |
| 61 | 1  | 0 | -0.262538 | 6.621991  | -1.112218 |
| 62 | 1  | 0 | 0.327749  | 4.143142  | -4.570682 |
| 63 | 1  | 0 | 0.242996  | 6.399751  | -3.531977 |
| 64 | 6  | 0 | -1.054439 | 2.267166  | 1.279042  |
| 65 | 6  | 0 | -0.216773 | 2.069635  | 2.380522  |
| 66 | 6  | 0 | -2.301420 | 2.878402  | 1.463140  |
| 67 | 6  | 0 | -0.617544 | 2.500649  | 3.643971  |
| 68 | 1  | 0 | 0.733552  | 1.541471  | 2.280934  |
| 69 | 6  | 0 | -2.693451 | 3.311667  | 2.723294  |
| 70 | 1  | 0 | -2.968713 | 3.009628  | 0.611085  |
| 71 | 6  | 0 | -1.846613 | 3.126066  | 3.816551  |
| 72 | 1  | 0 | 0.039092  | 2.329992  | 4.493939  |
| 73 | 1  | 0 | -3.660374 | 3.794159  | 2.855159  |
| 74 | 1  | 0 | -2.153678 | 3.462918  | 4.804780  |
| 75 | 6  | 0 | 2.764776  | 1.445418  | 0.553498  |
| 76 | 6  | 0 | 3.221074  | 1.497298  | -0.811422 |
| 77 | 6  | 0 | 4.418417  | 0.616197  | -1.166898 |
| 78 | 6  | 0 | 3.317092  | 0.564746  | 1.560207  |
| 79 | 6  | 0 | 4.490551  | -0.303475 | 1.138105  |
| 80 | 6  | 0 | 5.339703  | 0.311799  | 0.021379  |
| 81 | 8  | 0 | 2.898621  | 0.524595  | 2.721318  |
| 82 | 1  | 0 | 2.251138  | 2.326409  | 0.945298  |
| 83 | 1  | 0 | 4.994248  | 1.103913  | -1.969837 |
| 84 | 1  | 0 | 4.083043  | -0.341865 | -1.584290 |
| 85 | 1  | 0 | 4.103093  | -1.282572 | 0.809008  |
| 86 | 1  | 0 | 5.091722  | -0.498033 | 2.037308  |
| 87 | 6  | 0 | 3.240477  | 2.869611  | -1.441060 |
| 88 | 1  | 0 | 4.115194  | 3.421574  | -1.064463 |
| 89 | 1  | 0 | 3.314065  | 2.817055  | -2.533571 |
| 90 | 1  | 0 | 2.343227  | 3.448946  | -1.190266 |
| 91 | 6  | 0 | 6.402810  | -0.687810 | -0.422684 |
| 92 | 1  | 0 | 7.026503  | -0.271752 | -1.225720 |
| 93 | 1  | 0 | 7.063880  | -0.951822 | 0.413302  |
| 94 | 1  | 0 | 5.949268  | -1.616316 | -0.795728 |
| 95 | 6  | 0 | 6.039596  | 1.575335  | 0.522647  |

|     |   |   |          |           |           |
|-----|---|---|----------|-----------|-----------|
| 96  | 1 | 0 | 6.725088 | 1.332478  | 1.345294  |
| 97  | 1 | 0 | 6.629653 | 2.038745  | -0.280201 |
| 98  | 1 | 0 | 5.327265 | 2.321193  | 0.894239  |
| 99  | 1 | 0 | 3.239639 | -1.966433 | 3.219328  |
| 100 | 1 | 0 | 3.311483 | -2.640454 | 2.901920  |

Zero-point correction= 0.796007 (Hartree/Particle)

Thermal correction to Gibbs Free Energy= 0.715117

Sum of electronic and zero-point Energies= -4514.709088

SCF- Energy:M06 (PCM, toluene)/6-31G(d, p) = -4515.530101 (a.u.)

**S-out-TS2:**

Standard orientation:

| Center<br>Number | Atomic<br>Number | Atomic<br>Type | Coordinates (Angstroms) |           |           |
|------------------|------------------|----------------|-------------------------|-----------|-----------|
|                  |                  |                | X                       | Y         | Z         |
| 1                | 6                | 0              | 0.554120                | 0.832426  | 3.746956  |
| 2                | 6                | 0              | 1.315146                | -0.311145 | 3.752258  |
| 3                | 6                | 0              | 1.868254                | -0.821045 | 2.585099  |
| 4                | 6                | 0              | 1.691576                | -0.238963 | 1.348436  |
| 5                | 6                | 0              | 0.970280                | 0.988755  | 1.333937  |
| 6                | 6                | 0              | 0.393820                | 1.472134  | 2.509152  |
| 7                | 6                | 0              | 2.228703                | -0.907108 | 0.135306  |
| 8                | 6                | 0              | 3.586960                | -0.893079 | -0.096729 |
| 9                | 6                | 0              | 4.168841                | -1.412578 | -1.244996 |
| 10               | 6                | 0              | 3.414760                | -2.005885 | -2.227179 |
| 11               | 6                | 0              | 2.033350                | -2.077310 | -1.997911 |
| 12               | 6                | 0              | 1.435748                | -1.572597 | -0.843586 |
| 13               | 8                | 0              | 1.648884                | -1.112874 | 4.801524  |
| 14               | 6                | 0              | 2.320371                | -2.231097 | 4.240690  |
| 15               | 8                | 0              | 4.553975                | -0.362077 | 0.703526  |
| 16               | 6                | 0              | 5.761093                | -0.442355 | -0.038362 |
| 17               | 8                | 0              | 5.517024                | -1.228273 | -1.195086 |
| 18               | 8                | 0              | 2.554917                | -1.962428 | 2.867374  |
| 19               | 15               | 0              | 0.581367                | 1.734269  | -0.290162 |
| 20               | 15               | 0              | -0.396115               | -1.563892 | -0.694423 |
| 21               | 1                | 0              | 0.100774                | 1.218975  | 4.654388  |
| 22               | 1                | 0              | -0.213140               | 2.373627  | 2.471398  |
| 23               | 1                | 0              | 3.866149                | -2.397761 | -3.133284 |
| 24               | 1                | 0              | 1.406958                | -2.544792 | -2.753734 |
| 25               | 1                | 0              | 1.681488                | -3.124753 | 4.333619  |
| 26               | 1                | 0              | 3.278613                | -2.379962 | 4.753567  |
| 27               | 1                | 0              | 6.536496                | -0.919360 | 0.573184  |
| 28               | 1                | 0              | 6.068029                | 0.571274  | -0.344740 |
| 29               | 6                | 0              | -0.951107               | -2.929541 | -1.789044 |
| 30               | 6                | 0              | -0.383237               | -4.211051 | -1.788420 |
| 31               | 6                | 0              | -2.041614               | -2.674687 | -2.625232 |
| 32               | 6                | 0              | -0.892170               | -5.210395 | -2.606538 |
| 33               | 1                | 0              | 0.480070                | -4.428947 | -1.162766 |
| 34               | 6                | 0              | -2.553073               | -3.681356 | -3.441709 |
| 35               | 1                | 0              | -2.497518               | -1.684280 | -2.649683 |
| 36               | 6                | 0              | -1.981513               | -4.946922 | -3.434523 |
| 37               | 1                | 0              | -0.437032               | -6.198447 | -2.599323 |
| 38               | 1                | 0              | -3.401063               | -3.464530 | -4.086880 |
| 39               | 1                | 0              | -2.379264               | -5.730610 | -4.075681 |
| 40               | 6                | 0              | -0.670688               | -2.232377 | 0.996565  |
| 41               | 6                | 0              | -1.550080               | -1.536225 | 1.825509  |
| 42               | 6                | 0              | -0.068320               | -3.397158 | 1.482496  |
| 43               | 6                | 0              | -1.841146               | -1.992251 | 3.107493  |
| 44               | 1                | 0              | -1.993355               | -0.612301 | 1.456659  |
| 45               | 6                | 0              | -0.365352               | -3.863878 | 2.757887  |
| 46               | 1                | 0              | 0.653106                | -3.937828 | 0.872806  |
| 47               | 6                | 0              | -1.253406               | -3.163080 | 3.573365  |
| 48               | 1                | 0              | -2.523546               | -1.426772 | 3.739670  |
| 49               | 1                | 0              | 0.097545                | -4.780949 | 3.118731  |
| 50               | 1                | 0              | -1.480288               | -3.529020 | 4.572433  |
| 51               | 6                | 0              | 0.247371                | 3.519296  | -0.031847 |
| 52               | 6                | 0              | -0.423362               | 4.138378  | -1.093358 |

|     |    |   |           |           |           |
|-----|----|---|-----------|-----------|-----------|
| 53  | 6  | 0 | 0.686371  | 4.306538  | 1.036336  |
| 54  | 6  | 0 | -0.672436 | 5.505720  | -1.077457 |
| 55  | 1  | 0 | -0.743862 | 3.536077  | -1.944875 |
| 56  | 6  | 0 | 0.420661  | 5.672172  | 1.060248  |
| 57  | 1  | 0 | 1.240367  | 3.856906  | 1.858108  |
| 58  | 6  | 0 | -0.262082 | 6.273652  | 0.008029  |
| 59  | 1  | 0 | -1.193966 | 5.970043  | -1.911119 |
| 60  | 1  | 0 | 0.756962  | 6.270466  | 1.904295  |
| 61  | 1  | 0 | -0.467567 | 7.341358  | 0.030678  |
| 62  | 6  | 0 | 2.200082  | 1.858993  | -1.145799 |
| 63  | 6  | 0 | 2.265813  | 1.493569  | -2.490944 |
| 64  | 6  | 0 | 3.337940  | 2.371989  | -0.516392 |
| 65  | 6  | 0 | 3.459603  | 1.623157  | -3.196140 |
| 66  | 1  | 0 | 1.374335  | 1.099685  | -2.981042 |
| 67  | 6  | 0 | 4.524894  | 2.513655  | -1.224938 |
| 68  | 1  | 0 | 3.296022  | 2.653662  | 0.535573  |
| 69  | 6  | 0 | 4.588825  | 2.133518  | -2.565601 |
| 70  | 1  | 0 | 3.504216  | 1.326645  | -4.241568 |
| 71  | 1  | 0 | 5.403220  | 2.929654  | -0.733553 |
| 72  | 1  | 0 | 5.520709  | 2.239457  | -3.116852 |
| 73  | 29 | 0 | -1.062545 | 0.523084  | -1.172265 |
| 74  | 1  | 0 | -1.241105 | 0.677909  | -2.870895 |
| 75  | 1  | 0 | -2.241062 | 0.571156  | -2.864101 |
| 76  | 6  | 0 | -3.201046 | 1.918516  | 0.720761  |
| 77  | 6  | 0 | -4.469920 | -0.408167 | -0.647888 |
| 78  | 6  | 0 | -2.889025 | 1.550723  | -0.723541 |
| 79  | 6  | 0 | -3.558414 | 0.531495  | -1.392306 |
| 80  | 8  | 0 | -3.447931 | 0.334730  | -2.675383 |
| 81  | 1  | 0 | -5.157122 | -0.853884 | -1.381059 |
| 82  | 1  | 0 | -3.884446 | -1.242538 | -0.225826 |
| 83  | 1  | 0 | -2.622829 | 2.406966  | -1.349161 |
| 84  | 6  | 0 | -4.225516 | 0.981611  | 1.393620  |
| 85  | 1  | 0 | -4.768256 | 1.541582  | 2.172398  |
| 86  | 1  | 0 | -3.696044 | 0.180864  | 1.930961  |
| 87  | 6  | 0 | -5.239944 | 0.297331  | 0.470884  |
| 88  | 6  | 0 | -6.224986 | 1.297785  | -0.132998 |
| 89  | 6  | 0 | -6.016229 | -0.735977 | 1.280833  |
| 90  | 1  | 0 | -5.729734 | 2.004948  | -0.808486 |
| 91  | 1  | 0 | -6.729324 | 1.874231  | 0.654626  |
| 92  | 1  | 0 | -6.996417 | 0.774380  | -0.713651 |
| 93  | 1  | 0 | -5.338292 | -1.479429 | 1.723747  |
| 94  | 1  | 0 | -6.574315 | -0.258511 | 2.097827  |
| 95  | 1  | 0 | -6.737252 | -1.272137 | 0.649595  |
| 96  | 1  | 0 | -2.277450 | 1.847837  | 1.325076  |
| 97  | 6  | 0 | -3.627035 | 3.385147  | 0.805378  |
| 98  | 1  | 0 | -3.815837 | 3.682438  | 1.845040  |
| 99  | 1  | 0 | -4.540936 | 3.576088  | 0.228830  |
| 100 | 1  | 0 | -2.841234 | 4.040891  | 0.407073  |

Zero-point correction= 0.798817 (Hartree/Particle)

Thermal correction to Gibbs Free Energy= 0.718748

Sum of electronic and zero-point Energies= -4514.717787

SCF- Energy:M06 (PCM, toluene)/6-31G(d, p) = -4515.539952 (a.u.)

**S-out-COM3:**

Standard orientation:

| Center Number | Atomic Number | Atomic Type | Coordinates (Angstroms) |           |           |
|---------------|---------------|-------------|-------------------------|-----------|-----------|
|               |               |             | X                       | Y         | Z         |
| 1             | 6             | 0           | 0.269285                | 1.006480  | 3.640649  |
| 2             | 6             | 0           | 1.102062                | -0.080346 | 3.749865  |
| 3             | 6             | 0           | 1.782521                | -0.587027 | 2.651616  |
| 4             | 6             | 0           | 1.660473                | -0.066323 | 1.380505  |
| 5             | 6             | 0           | 0.869052                | 1.110470  | 1.263389  |
| 6             | 6             | 0           | 0.174923                | 1.597658  | 2.372666  |
| 7             | 6             | 0           | 2.326999                | -0.756891 | 0.246227  |
| 8             | 6             | 0           | 3.700209                | -0.711319 | 0.141432  |
| 9             | 6             | 0           | 4.405758                | -1.309911 | -0.893950 |

|    |    |   |           |           |           |
|----|----|---|-----------|-----------|-----------|
| 10 | 6  | 0 | 3.766695  | -1.995962 | -1.897513 |
| 11 | 6  | 0 | 2.370386  | -2.086288 | -1.802543 |
| 12 | 6  | 0 | 1.650594  | -1.514497 | -0.753890 |
| 13 | 8  | 0 | 1.386050  | -0.832040 | 4.849474  |
| 14 | 6  | 0 | 2.290588  | -1.837627 | 4.421020  |
| 15 | 8  | 0 | 4.571264  | -0.090044 | 0.986526  |
| 16 | 6  | 0 | 5.849067  | -0.205635 | 0.381697  |
| 17 | 8  | 0 | 5.739380  | -1.093304 | -0.720090 |
| 18 | 8  | 0 | 2.516249  | -1.670578 | 3.030337  |
| 19 | 15 | 0 | 0.545881  | 1.768003  | -0.410515 |
| 20 | 15 | 0 | -0.184861 | -1.586531 | -0.745569 |
| 21 | 1  | 0 | -0.282245 | 1.388830  | 4.493685  |
| 22 | 1  | 0 | -0.473019 | 2.463884  | 2.255335  |
| 23 | 1  | 0 | 4.315636  | -2.448851 | -2.717061 |
| 24 | 1  | 0 | 1.831355  | -2.626618 | -2.577081 |
| 25 | 1  | 0 | 1.848160  | -2.827964 | 4.602772  |
| 26 | 1  | 0 | 3.242495  | -1.735025 | 4.961765  |
| 27 | 1  | 0 | 6.564541  | -0.609243 | 1.108895  |
| 28 | 1  | 0 | 6.175086  | 0.783378  | 0.021819  |
| 29 | 6  | 0 | -0.605713 | -3.012304 | -1.824070 |
| 30 | 6  | 0 | -0.046283 | -4.287523 | -1.675697 |
| 31 | 6  | 0 | -1.601072 | -2.816981 | -2.782999 |
| 32 | 6  | 0 | -0.461735 | -5.337778 | -2.482850 |
| 33 | 1  | 0 | 0.726935  | -4.461719 | -0.929263 |
| 34 | 6  | 0 | -2.024384 | -3.873601 | -3.585879 |
| 35 | 1  | 0 | -2.043045 | -1.828529 | -2.900031 |
| 36 | 6  | 0 | -1.453530 | -5.131320 | -3.440285 |
| 37 | 1  | 0 | -0.014660 | -6.322310 | -2.362634 |
| 38 | 1  | 0 | -2.801408 | -3.706156 | -4.327958 |
| 39 | 1  | 0 | -1.780067 | -5.956146 | -4.070043 |
| 40 | 6  | 0 | -0.555976 | -2.264090 | 0.919847  |
| 41 | 6  | 0 | -1.730696 | -1.826745 | 1.531782  |
| 42 | 6  | 0 | 0.234518  | -3.214166 | 1.572630  |
| 43 | 6  | 0 | -2.109506 | -2.313321 | 2.778858  |
| 44 | 1  | 0 | -2.341935 | -1.089238 | 1.013120  |
| 45 | 6  | 0 | -0.147423 | -3.710112 | 2.814191  |
| 46 | 1  | 0 | 1.174547  | -3.541446 | 1.129447  |
| 47 | 6  | 0 | -1.315429 | -3.256100 | 3.423542  |
| 48 | 1  | 0 | -3.024684 | -1.952956 | 3.246066  |
| 49 | 1  | 0 | 0.472108  | -4.455699 | 3.310728  |
| 50 | 1  | 0 | -1.606546 | -3.640641 | 4.398559  |
| 51 | 6  | 0 | 0.069316  | 3.528995  | -0.218130 |
| 52 | 6  | 0 | -0.684191 | 4.058922  | -1.271750 |
| 53 | 6  | 0 | 0.468861  | 4.376737  | 0.819528  |
| 54 | 6  | 0 | -1.058832 | 5.398097  | -1.271924 |
| 55 | 1  | 0 | -0.972744 | 3.408862  | -2.099987 |
| 56 | 6  | 0 | 0.081187  | 5.712322  | 0.825513  |
| 57 | 1  | 0 | 1.079160  | 3.993145  | 1.635059  |
| 58 | 6  | 0 | -0.687335 | 6.223981  | -0.216253 |
| 59 | 1  | 0 | -1.647928 | 5.793682  | -2.095902 |
| 60 | 1  | 0 | 0.386237  | 6.358000  | 1.646176  |
| 61 | 1  | 0 | -0.990572 | 7.268409  | -0.207312 |
| 62 | 6  | 0 | 2.198296  | 1.964434  | -1.177013 |
| 63 | 6  | 0 | 2.331921  | 1.639060  | -2.527868 |
| 64 | 6  | 0 | 3.287922  | 2.500247  | -0.484642 |
| 65 | 6  | 0 | 3.551384  | 1.825279  | -3.173812 |
| 66 | 1  | 0 | 1.475917  | 1.221708  | -3.060606 |
| 67 | 6  | 0 | 4.501386  | 2.693017  | -1.133635 |
| 68 | 1  | 0 | 3.190801  | 2.751431  | 0.571417  |
| 69 | 6  | 0 | 4.635206  | 2.350326  | -2.478680 |
| 70 | 1  | 0 | 3.652550  | 1.560250  | -4.223719 |
| 71 | 1  | 0 | 5.343828  | 3.121234  | -0.592560 |
| 72 | 1  | 0 | 5.586759  | 2.499530  | -2.984663 |
| 73 | 29 | 0 | -0.862715 | 0.423766  | -1.457981 |
| 74 | 1  | 0 | -1.181444 | 0.591719  | -3.012452 |
| 75 | 1  | 0 | -2.744183 | 0.348677  | -2.895091 |
| 76 | 6  | 0 | -3.291077 | 1.383724  | 0.868357  |
| 77 | 6  | 0 | -4.996000 | -0.459137 | -0.763285 |
| 78 | 6  | 0 | -3.040167 | 1.083129  | -0.588006 |

|     |   |   |           |           |           |
|-----|---|---|-----------|-----------|-----------|
| 79  | 6 | 0 | -3.830606 | 0.280567  | -1.338225 |
| 80  | 8 | 0 | -3.667558 | 0.058946  | -2.650578 |
| 81  | 1 | 0 | -5.747577 | -0.585718 | -1.556054 |
| 82  | 1 | 0 | -4.670291 | -1.478276 | -0.489405 |
| 83  | 1 | 0 | -2.337653 | 1.743800  | -1.111083 |
| 84  | 6 | 0 | -4.471699 | 0.576226  | 1.435457  |
| 85  | 1 | 0 | -4.890895 | 1.104462  | 2.306592  |
| 86  | 1 | 0 | -4.100621 | -0.386517 | 1.821733  |
| 87  | 6 | 0 | -5.602536 | 0.248449  | 0.451283  |
| 88  | 6 | 0 | -6.350608 | 1.502119  | -0.004733 |
| 89  | 6 | 0 | -6.594138 | -0.686120 | 1.137168  |
| 90  | 1 | 0 | -5.722352 | 2.154483  | -0.621504 |
| 91  | 1 | 0 | -6.703818 | 2.083418  | 0.857872  |
| 92  | 1 | 0 | -7.228532 | 1.225717  | -0.603927 |
| 93  | 1 | 0 | -6.099635 | -1.600294 | 1.492618  |
| 94  | 1 | 0 | -7.062057 | -0.196994 | 2.002132  |
| 95  | 1 | 0 | -7.395367 | -0.983944 | 0.447623  |
| 96  | 1 | 0 | -2.396735 | 1.084542  | 1.447613  |
| 97  | 6 | 0 | -3.442172 | 2.889175  | 1.100376  |
| 98  | 1 | 0 | -3.535688 | 3.110484  | 2.171913  |
| 99  | 1 | 0 | -4.325997 | 3.294407  | 0.594663  |
| 100 | 1 | 0 | -2.569064 | 3.435364  | 0.718286  |

Zero-point correction= 0.803356 (Hartree/Particle)

Thermal correction to Gibbs Free Energy= 0.722230

Sum of electronic and zero-point Energies= -4514.718215

SCF- Energy:M06 (PCM, toluene)/6-31G(d, p) = -4515.545863 (a.u.)

**R-out-COM3:**

Standard orientation:

| Center Number | Atomic Number | Atomic Type | Coordinates (Angstroms) |           |           |
|---------------|---------------|-------------|-------------------------|-----------|-----------|
|               |               |             | X                       | Y         | Z         |
| 1             | 6             | 0           | -1.925968               | -1.245827 | 3.602639  |
| 2             | 6             | 0           | -2.795181               | -0.224004 | 3.312918  |
| 3             | 6             | 0           | -2.888670               | 0.303181  | 2.032699  |
| 4             | 6             | 0           | -2.109803               | -0.122195 | 0.976215  |
| 5             | 6             | 0           | -1.181150               | -1.161332 | 1.263992  |
| 6             | 6             | 0           | -1.125250               | -1.705022 | 2.546691  |
| 7             | 6             | 0           | -2.382053               | 0.461067  | -0.365181 |
| 8             | 6             | 0           | -3.537749               | 0.081191  | -1.015838 |
| 9             | 6             | 0           | -3.922624               | 0.591412  | -2.249857 |
| 10            | 6             | 0           | -3.184322               | 1.559193  | -2.886750 |
| 11            | 6             | 0           | -2.009957               | 1.976024  | -2.244405 |
| 12            | 6             | 0           | -1.599806               | 1.452762  | -1.020506 |
| 13            | 8             | 0           | -3.688346               | 0.398307  | 4.130893  |
| 14            | 6             | 0           | -4.281287               | 1.426057  | 3.350490  |
| 15            | 8             | 0           | -4.477271               | -0.809528 | -0.584520 |
| 16            | 6             | 0           | -5.293856               | -1.055168 | -1.716511 |
| 17            | 8             | 0           | -5.099402               | 0.016077  | -2.629089 |
| 18            | 8             | 0           | -3.857044               | 1.263383  | 2.008104  |
| 19            | 15            | 0           | -0.062003               | -1.692626 | -0.102771 |
| 20            | 15            | 0           | 0.079261                | 1.772217  | -0.363351 |
| 21            | 1             | 0           | -1.868619               | -1.682728 | 4.594748  |
| 22            | 1             | 0           | -0.446334               | -2.528254 | 2.748046  |
| 23            | 1             | 0           | -3.492319               | 1.974173  | -3.841350 |
| 24            | 1             | 0           | -1.392200               | 2.725563  | -2.732930 |
| 25            | 1             | 0           | -3.946463               | 2.407203  | 3.725343  |
| 26            | 1             | 0           | -5.373978               | 1.344184  | 3.403514  |
| 27            | 1             | 0           | -6.344509               | -1.088938 | -1.411228 |
| 28            | 1             | 0           | -4.979680               | -2.003844 | -2.188211 |
| 29            | 29            | 0           | 1.146729                | -0.070794 | -1.011636 |
| 30            | 6             | 0           | 0.693684                | 3.287035  | -1.186879 |
| 31            | 6             | 0           | 0.917288                | 4.490564  | -0.512299 |
| 32            | 6             | 0           | 1.098287                | 3.177279  | -2.525928 |
| 33            | 6             | 0           | 1.509860                | 5.566937  | -1.166933 |
| 34            | 1             | 0           | 0.634175                | 4.590770  | 0.533380  |
| 35            | 6             | 0           | 1.675429                | 4.259036  | -3.179761 |

|     |   |   |           |           |           |
|-----|---|---|-----------|-----------|-----------|
| 36  | 1 | 0 | 0.971560  | 2.221877  | -3.039552 |
| 37  | 6 | 0 | 1.883929  | 5.457642  | -2.501346 |
| 38  | 1 | 0 | 1.679944  | 6.496196  | -0.627387 |
| 39  | 1 | 0 | 1.976843  | 4.160641  | -4.220280 |
| 40  | 1 | 0 | 2.346725  | 6.300319  | -3.010128 |
| 41  | 6 | 0 | -0.254670 | 2.313451  | 1.354476  |
| 42  | 6 | 0 | 0.516199  | 1.785133  | 2.392163  |
| 43  | 6 | 0 | -1.282674 | 3.211777  | 1.660514  |
| 44  | 6 | 0 | 0.269843  | 2.149112  | 3.712522  |
| 45  | 1 | 0 | 1.293942  | 1.056318  | 2.159783  |
| 46  | 6 | 0 | -1.520358 | 3.588062  | 2.977416  |
| 47  | 1 | 0 | -1.909625 | 3.602580  | 0.858731  |
| 48  | 6 | 0 | -0.747425 | 3.051720  | 4.005878  |
| 49  | 1 | 0 | 0.866525  | 1.720135  | 4.514144  |
| 50  | 1 | 0 | -2.313751 | 4.298687  | 3.203478  |
| 51  | 1 | 0 | -0.941395 | 3.336562  | 5.037772  |
| 52  | 6 | 0 | 0.892784  | -3.099377 | 0.572501  |
| 53  | 6 | 0 | 1.005995  | -4.294611 | -0.143842 |
| 54  | 6 | 0 | 1.678043  | -2.929994 | 1.721676  |
| 55  | 6 | 0 | 1.856282  | -5.305112 | 0.294913  |
| 56  | 1 | 0 | 0.426633  | -4.435453 | -1.054171 |
| 57  | 6 | 0 | 2.498823  | -3.954941 | 2.177783  |
| 58  | 1 | 0 | 1.654851  | -1.980658 | 2.258342  |
| 59  | 6 | 0 | 2.592973  | -5.146023 | 1.463062  |
| 60  | 1 | 0 | 1.935928  | -6.225633 | -0.278867 |
| 61  | 1 | 0 | 3.081283  | -3.816316 | 3.086583  |
| 62  | 1 | 0 | 3.245916  | -5.942364 | 1.812218  |
| 63  | 6 | 0 | -1.274194 | -2.499194 | -1.224831 |
| 64  | 6 | 0 | -1.253778 | -2.208091 | -2.588900 |
| 65  | 6 | 0 | -2.232096 | -3.386654 | -0.721446 |
| 66  | 6 | 0 | -2.178648 | -2.804327 | -3.443337 |
| 67  | 1 | 0 | -0.515673 | -1.493054 | -2.959040 |
| 68  | 6 | 0 | -3.146339 | -3.988541 | -1.576467 |
| 69  | 1 | 0 | -2.260021 | -3.601395 | 0.346968  |
| 70  | 6 | 0 | -3.117398 | -3.699276 | -2.941168 |
| 71  | 1 | 0 | -2.161414 | -2.569244 | -4.505196 |
| 72  | 1 | 0 | -3.883933 | -4.683703 | -1.180366 |
| 73  | 1 | 0 | -3.833346 | -4.171625 | -3.611513 |
| 74  | 1 | 0 | 2.420286  | -0.859666 | -2.881369 |
| 75  | 1 | 0 | 0.989089  | -0.098877 | -2.655414 |
| 76  | 1 | 0 | 2.853992  | 1.829059  | 0.639362  |
| 77  | 6 | 0 | 3.481096  | -0.708067 | -1.335826 |
| 78  | 6 | 0 | 4.205080  | -1.605320 | -0.380795 |
| 79  | 6 | 0 | 3.210253  | 0.612012  | -1.084523 |
| 80  | 6 | 0 | 3.706631  | 1.317545  | 0.156421  |
| 81  | 6 | 0 | 4.258609  | 0.326032  | 1.185684  |
| 82  | 6 | 0 | 5.078689  | -0.840652 | 0.618978  |
| 83  | 8 | 0 | 3.235457  | -1.298992 | -2.520473 |
| 84  | 6 | 0 | 5.470085  | -1.767196 | 1.765974  |
| 85  | 6 | 0 | 6.360027  | -0.376516 | -0.076205 |
| 86  | 1 | 0 | 4.820767  | -2.288783 | -0.984348 |
| 87  | 1 | 0 | 3.483882  | -2.246189 | 0.148045  |
| 88  | 1 | 0 | 3.408256  | -0.121882 | 1.729506  |
| 89  | 1 | 0 | 4.854619  | 0.866405  | 1.938341  |
| 90  | 1 | 0 | 3.016963  | 1.256879  | -1.943070 |
| 91  | 6 | 0 | 4.673539  | 2.442264  | -0.220814 |
| 92  | 1 | 0 | 5.543232  | 2.081658  | -0.780254 |
| 93  | 1 | 0 | 4.163005  | 3.182933  | -0.850619 |
| 94  | 1 | 0 | 5.037506  | 2.962684  | 0.674268  |
| 95  | 1 | 0 | 5.944330  | -2.682901 | 1.387032  |
| 96  | 1 | 0 | 4.592014  | -2.065571 | 2.352930  |
| 97  | 1 | 0 | 6.180297  | -1.274497 | 2.443621  |
| 98  | 1 | 0 | 6.158071  | 0.122993  | -1.030116 |
| 99  | 1 | 0 | 7.002869  | -1.240495 | -0.291916 |
| 100 | 1 | 0 | 6.929552  | 0.315134  | 0.559575  |

-----  
Zero-point correction= 0.803976 (Hartree/Particle)  
Thermal correction to Gibbs Free Energy= 0.723722  
Sum of electronic and zero-point Energies= -4514.721758



SCF- Energy:M06 (PCM, toluene)/6-31G(d, p) = -4515.548217 (a.u.)

**S-out-COM2:**

Standard orientation:

| Center<br>Number | Atomic<br>Number | Atomic<br>Type | Coordinates (Angstroms) |           |           |
|------------------|------------------|----------------|-------------------------|-----------|-----------|
|                  |                  |                | X                       | Y         | Z         |
| 1                | 6                | 0              | 0.709327                | 0.991212  | 3.664526  |
| 2                | 6                | 0              | 1.456449                | -0.161550 | 3.684381  |
| 3                | 6                | 0              | 1.953236                | -0.727221 | 2.517753  |
| 4                | 6                | 0              | 1.730304                | -0.194545 | 1.266023  |
| 5                | 6                | 0              | 1.013808                | 1.034987  | 1.231424  |
| 6                | 6                | 0              | 0.498343                | 1.577663  | 2.408592  |
| 7                | 6                | 0              | 2.233274                | -0.907331 | 0.065263  |
| 8                | 6                | 0              | 3.588952                | -0.940935 | -0.183616 |
| 9                | 6                | 0              | 4.141879                | -1.527355 | -1.313662 |
| 10               | 6                | 0              | 3.356106                | -2.118555 | -2.272175 |
| 11               | 6                | 0              | 1.975398                | -2.135625 | -2.026810 |
| 12               | 6                | 0              | 1.408304                | -1.580672 | -0.879418 |
| 13               | 8                | 0              | 1.825623                | -0.921416 | 4.751395  |
| 14               | 6                | 0              | 2.491381                | -2.056095 | 4.216826  |
| 15               | 8                | 0              | 4.580187                | -0.408562 | 0.585034  |
| 16               | 6                | 0              | 5.789953                | -0.624288 | -0.124708 |
| 17               | 8                | 0              | 5.496363                | -1.391106 | -1.282185 |
| 18               | 8                | 0              | 2.637407                | -1.865374 | 2.818697  |
| 19               | 15               | 0              | 0.578479                | 1.775023  | -0.387891 |
| 20               | 15               | 0              | -0.418088               | -1.561581 | -0.657508 |
| 21               | 1                | 0              | 0.304533                | 1.422895  | 4.574525  |
| 22               | 1                | 0              | -0.082540               | 2.495725  | 2.357793  |
| 23               | 1                | 0              | 3.783571                | -2.556454 | -3.168684 |
| 24               | 1                | 0              | 1.327785                | -2.612548 | -2.758125 |
| 25               | 1                | 0              | 1.884192                | -2.956321 | 4.402482  |
| 26               | 1                | 0              | 3.481953                | -2.153329 | 4.679735  |
| 27               | 1                | 0              | 6.495554                | -1.173924 | 0.512022  |
| 28               | 1                | 0              | 6.214566                | 0.344888  | -0.428063 |
| 29               | 6                | 0              | -1.006084               | -2.957598 | -1.696029 |
| 30               | 6                | 0              | -0.381858               | -4.213920 | -1.710233 |
| 31               | 6                | 0              | -2.174313               | -2.775168 | -2.441388 |
| 32               | 6                | 0              | -0.908230               | -5.258267 | -2.456861 |
| 33               | 1                | 0              | 0.540601                | -4.373890 | -1.155506 |
| 34               | 6                | 0              | -2.700348               | -3.828685 | -3.187897 |
| 35               | 1                | 0              | -2.695686               | -1.815655 | -2.455324 |
| 36               | 6                | 0              | -2.072875               | -5.066783 | -3.197968 |
| 37               | 1                | 0              | -0.408516               | -6.224563 | -2.461810 |
| 38               | 1                | 0              | -3.608529               | -3.665724 | -3.763224 |
| 39               | 1                | 0              | -2.485539               | -5.885384 | -3.783783 |
| 40               | 6                | 0              | -0.622819               | -2.191170 | 1.057556  |
| 41               | 6                | 0              | -1.458235               | -1.477768 | 1.917057  |
| 42               | 6                | 0              | 0.006154                | -3.345677 | 1.534017  |
| 43               | 6                | 0              | -1.670349               | -1.902511 | 3.225234  |
| 44               | 1                | 0              | -1.933105               | -0.568126 | 1.550326  |
| 45               | 6                | 0              | -0.216480               | -3.782925 | 2.834483  |
| 46               | 1                | 0              | 0.688156                | -3.903779 | 0.895586  |
| 47               | 6                | 0              | -1.053552               | -3.060822 | 3.684411  |
| 48               | 1                | 0              | -2.315820               | -1.321920 | 3.881609  |
| 49               | 1                | 0              | 0.267702                | -4.691492 | 3.188455  |
| 50               | 1                | 0              | -1.220853               | -3.402178 | 4.703773  |
| 51               | 6                | 0              | 0.266443                | 3.549986  | -0.035552 |
| 52               | 6                | 0              | -0.709952               | 4.181092  | -0.809027 |
| 53               | 6                | 0              | 1.023182                | 4.321290  | 0.854625  |
| 54               | 6                | 0              | -0.935615               | 5.549874  | -0.691525 |
| 55               | 1                | 0              | -1.307278               | 3.586359  | -1.499417 |
| 56               | 6                | 0              | 0.792319                | 5.685164  | 0.979415  |
| 57               | 1                | 0              | 1.790377                | 3.851480  | 1.467184  |
| 58               | 6                | 0              | -0.187455               | 6.302518  | 0.205213  |
| 59               | 1                | 0              | -1.703148               | 6.023636  | -1.299665 |
| 60               | 1                | 0              | 1.382838                | 6.270698  | 1.680632  |
| 61               | 1                | 0              | -0.365566               | 7.370942  | 0.303463  |

|     |    |   |           |           |           |
|-----|----|---|-----------|-----------|-----------|
| 62  | 6  | 0 | 2.186898  | 1.899452  | -1.269116 |
| 63  | 6  | 0 | 2.210536  | 1.662330  | -2.644046 |
| 64  | 6  | 0 | 3.367571  | 2.287020  | -0.627224 |
| 65  | 6  | 0 | 3.394346  | 1.790943  | -3.365445 |
| 66  | 1  | 0 | 1.295149  | 1.358273  | -3.152261 |
| 67  | 6  | 0 | 4.546983  | 2.427076  | -1.348107 |
| 68  | 1  | 0 | 3.373097  | 2.458954  | 0.448505  |
| 69  | 6  | 0 | 4.563746  | 2.173481  | -2.718348 |
| 70  | 1  | 0 | 3.400556  | 1.593134  | -4.434709 |
| 71  | 1  | 0 | 5.457566  | 2.739120  | -0.838905 |
| 72  | 1  | 0 | 5.489198  | 2.277521  | -3.280364 |
| 73  | 29 | 0 | -1.169942 | 0.538596  | -1.051779 |
| 74  | 1  | 0 | -0.841979 | 0.480050  | -3.017193 |
| 75  | 1  | 0 | -1.595970 | 0.356489  | -2.922594 |
| 76  | 6  | 0 | -3.411128 | 2.154385  | 0.343518  |
| 77  | 6  | 0 | -4.414915 | -0.572274 | -0.401082 |
| 78  | 6  | 0 | -2.977528 | 1.454878  | -0.946910 |
| 79  | 6  | 0 | -3.700557 | 0.305217  | -1.421335 |
| 80  | 8  | 0 | -3.732921 | -0.039079 | -2.621449 |
| 81  | 1  | 0 | -5.105276 | -1.222352 | -0.956895 |
| 82  | 1  | 0 | -3.680132 | -1.235739 | 0.084989  |
| 83  | 1  | 0 | -2.881785 | 2.170830  | -1.777147 |
| 84  | 6  | 0 | -4.171909 | 1.225953  | 1.301271  |
| 85  | 1  | 0 | -4.707450 | 1.834503  | 2.048650  |
| 86  | 1  | 0 | -3.440451 | 0.635687  | 1.877439  |
| 87  | 6  | 0 | -5.155878 | 0.233006  | 0.668286  |
| 88  | 6  | 0 | -6.356659 | 0.932408  | 0.027241  |
| 89  | 6  | 0 | -5.673636 | -0.706066 | 1.753820  |
| 90  | 1  | 0 | -6.083537 | 1.473080  | -0.885776 |
| 91  | 1  | 0 | -6.819928 | 1.645426  | 0.723257  |
| 92  | 1  | 0 | -7.117113 | 0.191450  | -0.253584 |
| 93  | 1  | 0 | -4.849766 | -1.237445 | 2.249698  |
| 94  | 1  | 0 | -6.230576 | -0.152489 | 2.522601  |
| 95  | 1  | 0 | -6.348287 | -1.461013 | 1.328453  |
| 96  | 1  | 0 | -2.516422 | 2.486219  | 0.900253  |
| 97  | 6  | 0 | -4.184270 | 3.438849  | 0.033273  |
| 98  | 1  | 0 | -4.534240 | 3.930697  | 0.951245  |
| 99  | 1  | 0 | -5.054141 | 3.258633  | -0.608972 |
| 100 | 1  | 0 | -3.536087 | 4.151150  | -0.494411 |

Zero-point correction= 0.802115 (Hartree/Particle)

Thermal correction to Gibbs Free Energy= 0.721165

Sum of electronic and zero-point Energies= -4514.726804

SCF- Energy:M06 (PCM, toluene)/6-31G(d, p) = -4515.55391 (a.u.)

**R-out-COM2:**

Standard orientation:

| Center<br>Number | Atomic<br>Number | Atomic<br>Type | Coordinates (Angstroms) |           |           |
|------------------|------------------|----------------|-------------------------|-----------|-----------|
|                  |                  |                | X                       | Y         | Z         |
| 1                | 6                | 0              | -2.446525               | -1.801450 | 3.228334  |
| 2                | 6                | 0              | -3.483779               | -1.126249 | 2.634067  |
| 3                | 6                | 0              | -3.385765               | -0.637948 | 1.336962  |
| 4                | 6                | 0              | -2.251793               | -0.767427 | 0.562116  |
| 5                | 6                | 0              | -1.162341               | -1.451352 | 1.168299  |
| 6                | 6                | 0              | -1.282438               | -1.955711 | 2.462163  |
| 7                | 6                | 0              | -2.305244               | -0.249039 | -0.833626 |
| 8                | 6                | 0              | -2.993331               | -0.976215 | -1.779324 |
| 9                | 6                | 0              | -3.220430               | -0.523203 | -3.076023 |
| 10               | 6                | 0              | -2.821095               | 0.726631  | -3.479757 |
| 11               | 6                | 0              | -2.112167               | 1.490215  | -2.540451 |
| 12               | 6                | 0              | -1.832462               | 1.027180  | -1.256985 |
| 13               | 8                | 0              | -4.718618               | -0.848838 | 3.133508  |
| 14               | 6                | 0              | -5.365920               | -0.049718 | 2.154366  |
| 15               | 8                | 0              | -3.587754               | -2.195168 | -1.621161 |
| 16               | 6                | 0              | -3.861454               | -2.624523 | -2.944691 |
| 17               | 8                | 0              | -3.925340               | -1.465480 | -3.762305 |
| 18               | 8                | 0              | -4.563490               | -0.047289 | 0.985977  |

|    |    |   |           |           |           |
|----|----|---|-----------|-----------|-----------|
| 19 | 15 | 0 | 0.424338  | -1.518749 | 0.254942  |
| 20 | 15 | 0 | -0.610008 | 1.852780  | -0.177060 |
| 21 | 1  | 0 | -2.527338 | -2.198159 | 4.235457  |
| 22 | 1  | 0 | -0.442676 | -2.484349 | 2.905152  |
| 23 | 1  | 0 | -3.027866 | 1.096586  | -4.478890 |
| 24 | 1  | 0 | -1.748190 | 2.469274  | -2.841834 |
| 25 | 1  | 0 | -5.464801 | 0.980666  | 2.532626  |
| 26 | 1  | 0 | -6.350244 | -0.475421 | 1.925074  |
| 27 | 1  | 0 | -4.822009 | -3.146214 | -2.971414 |
| 28 | 1  | 0 | -3.036405 | -3.274854 | -3.288410 |
| 29 | 29 | 0 | 1.160018  | 0.497207  | -0.272116 |
| 30 | 6  | 0 | -0.311973 | 3.509796  | -0.879926 |
| 31 | 6  | 0 | -0.587908 | 4.685688  | -0.177819 |
| 32 | 6  | 0 | 0.367826  | 3.597177  | -2.104471 |
| 33 | 6  | 0 | -0.213638 | 5.921838  | -0.696251 |
| 34 | 1  | 0 | -1.094514 | 4.638913  | 0.783960  |
| 35 | 6  | 0 | 0.725650  | 4.833827  | -2.626031 |
| 36 | 1  | 0 | 0.625365  | 2.690629  | -2.651648 |
| 37 | 6  | 0 | 0.437507  | 5.999956  | -1.921816 |
| 38 | 1  | 0 | -0.434359 | 6.827950  | -0.136414 |
| 39 | 1  | 0 | 1.245201  | 4.884416  | -3.579964 |
| 40 | 1  | 0 | 0.729360  | 6.966755  | -2.325295 |
| 41 | 6  | 0 | -1.510229 | 2.171821  | 1.377206  |
| 42 | 6  | 0 | -0.868340 | 1.905370  | 2.588179  |
| 43 | 6  | 0 | -2.818126 | 2.666695  | 1.388542  |
| 44 | 6  | 0 | -1.525847 | 2.120181  | 3.795536  |
| 45 | 1  | 0 | 0.150087  | 1.513499  | 2.579928  |
| 46 | 6  | 0 | -3.469831 | 2.894878  | 2.594908  |
| 47 | 1  | 0 | -3.323896 | 2.869236  | 0.444365  |
| 48 | 6  | 0 | -2.826412 | 2.613538  | 3.799104  |
| 49 | 1  | 0 | -1.022598 | 1.902446  | 4.734558  |
| 50 | 1  | 0 | -4.481367 | 3.297433  | 2.597713  |
| 51 | 1  | 0 | -3.339761 | 2.784321  | 4.742735  |
| 52 | 6  | 0 | 1.561182  | -2.364320 | 1.411686  |
| 53 | 6  | 0 | 2.079553  | -3.636400 | 1.167332  |
| 54 | 6  | 0 | 2.010141  | -1.650457 | 2.530933  |
| 55 | 6  | 0 | 3.030841  | -4.183189 | 2.025625  |
| 56 | 1  | 0 | 1.748695  | -4.197751 | 0.295116  |
| 57 | 6  | 0 | 2.944486  | -2.203963 | 3.395296  |
| 58 | 1  | 0 | 1.620757  | -0.648941 | 2.724250  |
| 59 | 6  | 0 | 3.461960  | -3.473137 | 3.139616  |
| 60 | 1  | 0 | 3.435509  | -5.171477 | 1.819899  |
| 61 | 1  | 0 | 3.283849  | -1.638069 | 4.260211  |
| 62 | 1  | 0 | 4.206459  | -3.901460 | 3.806549  |
| 63 | 6  | 0 | 0.154924  | -2.740220 | -1.068944 |
| 64 | 6  | 0 | 1.053093  | -2.747322 | -2.142708 |
| 65 | 6  | 0 | -0.857529 | -3.701828 | -0.999034 |
| 66 | 6  | 0 | 0.923765  | -3.709719 | -3.139464 |
| 67 | 1  | 0 | 1.850967  | -1.999455 | -2.214823 |
| 68 | 6  | 0 | -0.980921 | -4.657093 | -2.002569 |
| 69 | 1  | 0 | -1.559960 | -3.695927 | -0.166703 |
| 70 | 6  | 0 | -0.090214 | -4.660624 | -3.074020 |
| 71 | 1  | 0 | 1.619730  | -3.708149 | -3.974809 |
| 72 | 1  | 0 | -1.769044 | -5.405698 | -1.941884 |
| 73 | 1  | 0 | -0.186784 | -5.409451 | -3.857580 |
| 74 | 1  | 0 | 0.922848  | 0.049876  | -3.187156 |
| 75 | 1  | 0 | 0.182571  | 0.146825  | -3.290541 |
| 76 | 1  | 0 | 2.784458  | 2.449081  | 1.012683  |
| 77 | 6  | 0 | 3.387794  | 0.116943  | -1.391952 |
| 78 | 6  | 0 | 4.332157  | -0.723545 | -0.539241 |
| 79 | 6  | 0 | 2.858877  | 1.333335  | -0.836633 |
| 80 | 6  | 0 | 3.550435  | 2.063856  | 0.310314  |
| 81 | 6  | 0 | 4.425383  | 1.114924  | 1.139192  |
| 82 | 6  | 0 | 5.264819  | 0.100480  | 0.351174  |
| 83 | 8  | 0 | 3.078417  | -0.318067 | -2.520858 |
| 84 | 6  | 0 | 5.976460  | -0.818817 | 1.340922  |
| 85 | 6  | 0 | 6.325585  | 0.773396  | -0.522608 |
| 86 | 1  | 0 | 4.907814  | -1.355683 | -1.230174 |
| 87 | 1  | 0 | 3.737151  | -1.411325 | 0.084552  |

|     |   |   |          |           |           |
|-----|---|---|----------|-----------|-----------|
| 88  | 1 | 0 | 3.769715 | 0.530305  | 1.808859  |
| 89  | 1 | 0 | 5.087182 | 1.702614  | 1.797174  |
| 90  | 1 | 0 | 2.541431 | 2.012701  | -1.639452 |
| 91  | 6 | 0 | 4.278645 | 3.315173  | -0.184268 |
| 92  | 1 | 0 | 5.022208 | 3.089046  | -0.956442 |
| 93  | 1 | 0 | 3.553272 | 4.012451  | -0.625854 |
| 94  | 1 | 0 | 4.788456 | 3.838545  | 0.636774  |
| 95  | 1 | 0 | 6.537904 | -1.601861 | 0.812942  |
| 96  | 1 | 0 | 5.260490 | -1.314797 | 2.011289  |
| 97  | 1 | 0 | 6.689017 | -0.255165 | 1.959865  |
| 98  | 1 | 0 | 5.886341 | 1.284220  | -1.386768 |
| 99  | 1 | 0 | 7.023431 | 0.020653  | -0.913585 |
| 100 | 1 | 0 | 6.908154 | 1.508447  | 0.050158  |

Zero-point correction= 0.802014 (Hartree/Particle)  
 Thermal correction to Gibbs Free Energy= 0.720830  
 Sum of electronic and zero-point Energies= -4514.732756  
 SCF- Energy:M06 (PCM, toluene)/6-31G(d, p) = -4515.560408 (a.u.)

**Product:**

Standard orientation:

| Center Number | Atomic Number | Atomic Type | Coordinates (Angstroms) |           |           |
|---------------|---------------|-------------|-------------------------|-----------|-----------|
|               |               |             | X                       | Y         | Z         |
| 1             | 1             | 0           | 2.974843                | -1.680012 | 0.223250  |
| 2             | 1             | 0           | 1.042509                | 1.849618  | -1.550180 |
| 3             | 6             | 0           | 1.230333                | -0.977795 | -0.070878 |
| 4             | 6             | 0           | -0.189442               | -1.431226 | -0.172487 |
| 5             | 6             | 0           | 1.624493                | 0.287650  | -0.249626 |
| 6             | 6             | 0           | 0.691064                | 1.411517  | -0.599995 |
| 7             | 6             | 0           | -0.732376               | 0.895320  | -0.860025 |
| 8             | 6             | 0           | -1.188718               | -0.284044 | 0.009421  |
| 9             | 8             | 0           | 2.069620                | -2.012291 | 0.211798  |
| 10            | 6             | 0           | -2.566957               | -0.736979 | -0.463016 |
| 11            | 6             | 0           | -1.284031               | 0.086027  | 1.490195  |
| 12            | 1             | 0           | -0.361911               | -2.215462 | 0.580069  |
| 13            | 1             | 0           | -0.341370               | -1.914241 | -1.151855 |
| 14            | 1             | 0           | -0.793061               | 0.561206  | -1.907872 |
| 15            | 1             | 0           | -1.452207               | 1.722980  | -0.759521 |
| 16            | 1             | 0           | 2.684615                | 0.536579  | -0.146913 |
| 17            | 6             | 0           | 0.759534                | 2.542645  | 0.428423  |
| 18            | 1             | 0           | 0.425776                | 2.219275  | 1.420247  |
| 19            | 1             | 0           | 1.788918                | 2.907777  | 0.533094  |
| 20            | 1             | 0           | 0.135202                | 3.391247  | 0.121292  |
| 21            | 1             | 0           | -2.896659               | -1.627637 | 0.088562  |
| 22            | 1             | 0           | -2.561922               | -0.985432 | -1.532521 |
| 23            | 1             | 0           | -3.315161               | 0.050864  | -0.303900 |
| 24            | 1             | 0           | -0.297571               | 0.254730  | 1.935587  |
| 25            | 1             | 0           | -1.765576               | -0.725067 | 2.052756  |
| 26            | 1             | 0           | -1.886784               | 0.993208  | 1.631445  |

Zero-point correction= 0.234852 (Hartree/Particle)  
 Thermal correction to Gibbs Free Energy= 0.200588  
 Sum of electronic and zero-point Energies= -427.272208  
 SCF- Energy:M06 (PCM, toluene)/6-31G(d, p) = -427.5143545 (a.u.)

**R-in-TS1:**

Standard orientation:

| Center Number | Atomic Number | Atomic Type | Coordinates (Angstroms) |           |           |
|---------------|---------------|-------------|-------------------------|-----------|-----------|
|               |               |             | X                       | Y         | Z         |
| 1             | 1             | 0           | -1.976670               | 0.794923  | -2.017279 |
| 2             | 6             | 0           | 2.189289                | -2.468323 | -2.954682 |
| 3             | 6             | 0           | 3.287692                | -1.919090 | -2.340515 |
| 4             | 6             | 0           | 3.186474                | -1.295186 | -1.105624 |
| 5             | 6             | 0           | 1.995008                | -1.146844 | -0.424970 |
| 6             | 6             | 0           | 0.846232                | -1.706482 | -1.045752 |

|    |    |   |           |           |           |
|----|----|---|-----------|-----------|-----------|
| 7  | 6  | 0 | 0.967369  | -2.347893 | -2.278231 |
| 8  | 6  | 0 | 2.031791  | -0.492545 | 0.906629  |
| 9  | 6  | 0 | 2.609551  | -1.178215 | 1.954374  |
| 10 | 6  | 0 | 2.760005  | -0.641172 | 3.225150  |
| 11 | 6  | 0 | 2.359548  | 0.640420  | 3.510376  |
| 12 | 6  | 0 | 1.780071  | 1.365835  | 2.459637  |
| 13 | 6  | 0 | 1.599803  | 0.833038  | 1.184548  |
| 14 | 8  | 0 | 4.585399  | -1.908762 | -2.753149 |
| 15 | 6  | 0 | 5.291914  | -1.136653 | -1.794114 |
| 16 | 8  | 0 | 3.122800  | -2.441651 | 1.932005  |
| 17 | 6  | 0 | 3.447066  | -2.749768 | 3.277331  |
| 18 | 8  | 0 | 3.364041  | -1.553342 | 4.036612  |
| 19 | 8  | 0 | 4.423123  | -0.884134 | -0.702739 |
| 20 | 15 | 0 | -0.803062 | -1.414723 | -0.278973 |
| 21 | 15 | 0 | 0.699814  | 1.735946  | -0.145460 |
| 22 | 1  | 0 | 2.264494  | -2.974386 | -3.912047 |
| 23 | 1  | 0 | 0.086400  | -2.782513 | -2.740952 |
| 24 | 1  | 0 | 2.486535  | 1.073140  | 4.497841  |
| 25 | 1  | 0 | 1.466366  | 2.384548  | 2.664750  |
| 26 | 1  | 0 | 5.595524  | -0.179827 | -2.248596 |
| 27 | 1  | 0 | 6.168172  | -1.696618 | -1.445123 |
| 28 | 1  | 0 | 4.467690  | -3.147335 | 3.328122  |
| 29 | 1  | 0 | 2.720856  | -3.481241 | 3.668965  |
| 30 | 29 | 0 | -1.337355 | 0.755999  | -0.582851 |
| 31 | 6  | 0 | 0.606298  | 3.462907  | 0.463166  |
| 32 | 6  | 0 | 1.169915  | 4.527266  | -0.246168 |
| 33 | 6  | 0 | -0.151017 | 3.745811  | 1.611968  |
| 34 | 6  | 0 | 1.005205  | 5.837799  | 0.193307  |
| 35 | 1  | 0 | 1.744290  | 4.334454  | -1.149867 |
| 36 | 6  | 0 | -0.302910 | 5.054853  | 2.052840  |
| 37 | 1  | 0 | -0.647268 | 2.942162  | 2.158416  |
| 38 | 6  | 0 | 0.276804  | 6.104793  | 1.346653  |
| 39 | 1  | 0 | 1.453738  | 6.652764  | -0.370585 |
| 40 | 1  | 0 | -0.888648 | 5.251679  | 2.947565  |
| 41 | 1  | 0 | 0.152381  | 7.129084  | 1.690490  |
| 42 | 6  | 0 | 1.940696  | 1.824314  | -1.490588 |
| 43 | 6  | 0 | 1.508599  | 1.612688  | -2.801286 |
| 44 | 6  | 0 | 3.290130  | 2.099284  | -1.247449 |
| 45 | 6  | 0 | 2.415235  | 1.661872  | -3.856459 |
| 46 | 1  | 0 | 0.454903  | 1.389277  | -2.982345 |
| 47 | 6  | 0 | 4.191938  | 2.162426  | -2.303179 |
| 48 | 1  | 0 | 3.633040  | 2.254287  | -0.224426 |
| 49 | 6  | 0 | 3.756286  | 1.934765  | -3.608321 |
| 50 | 1  | 0 | 2.073277  | 1.484051  | -4.873384 |
| 51 | 1  | 0 | 5.239050  | 2.388704  | -2.108503 |
| 52 | 1  | 0 | 4.465455  | 1.975326  | -4.432479 |
| 53 | 6  | 0 | -1.876838 | -2.622463 | -1.150423 |
| 54 | 6  | 0 | -2.372556 | -3.781577 | -0.552296 |
| 55 | 6  | 0 | -2.278200 | -2.312092 | -2.456998 |
| 56 | 6  | 0 | -3.238266 | -4.621078 | -1.249186 |
| 57 | 1  | 0 | -2.099167 | -4.027775 | 0.471363  |
| 58 | 6  | 0 | -3.126629 | -3.160229 | -3.157481 |
| 59 | 1  | 0 | -1.939063 | -1.379372 | -2.909685 |
| 60 | 6  | 0 | -3.610775 | -4.318345 | -2.553291 |
| 61 | 1  | 0 | -3.622446 | -5.516726 | -0.765987 |
| 62 | 1  | 0 | -3.423375 | -2.908456 | -4.173306 |
| 63 | 1  | 0 | -4.284334 | -4.977030 | -3.096803 |
| 64 | 6  | 0 | -0.622117 | -2.081474 | 1.413834  |
| 65 | 6  | 0 | -1.113719 | -1.315684 | 2.475316  |
| 66 | 6  | 0 | 0.015205  | -3.298942 | 1.679883  |
| 67 | 6  | 0 | -0.979196 | -1.769161 | 3.784645  |
| 68 | 1  | 0 | -1.587874 | -0.349369 | 2.285486  |
| 69 | 6  | 0 | 0.133406  | -3.755995 | 2.986913  |
| 70 | 1  | 0 | 0.431388  | -3.883379 | 0.859009  |
| 71 | 6  | 0 | -0.359320 | -2.987599 | 4.041114  |
| 72 | 1  | 0 | -1.359155 | -1.160663 | 4.601806  |
| 73 | 1  | 0 | 0.614749  | -4.712592 | 3.184954  |
| 74 | 1  | 0 | -0.257781 | -3.342199 | 5.064774  |
| 75 | 6  | 0 | -3.493910 | 1.559455  | 1.435771  |

|     |   |   |           |           |           |
|-----|---|---|-----------|-----------|-----------|
| 76  | 6 | 0 | -4.906025 | 1.127934  | 1.095629  |
| 77  | 6 | 0 | -2.664807 | 2.007630  | 0.337193  |
| 78  | 6 | 0 | -3.016475 | 1.877949  | -1.044623 |
| 79  | 6 | 0 | -4.370541 | 1.262711  | -1.353627 |
| 80  | 8 | 0 | -3.139624 | 1.636330  | 2.614055  |
| 81  | 1 | 0 | -5.501322 | 2.057268  | 1.098011  |
| 82  | 1 | 0 | -5.294247 | 0.504410  | 1.912371  |
| 83  | 1 | 0 | -4.338020 | 0.688815  | -2.292246 |
| 84  | 1 | 0 | -5.025748 | 2.130091  | -1.557059 |
| 85  | 1 | 0 | -2.009618 | 2.832686  | 0.608060  |
| 86  | 6 | 0 | -2.693894 | 3.060071  | -1.930796 |
| 87  | 1 | 0 | -3.391869 | 3.880800  | -1.704464 |
| 88  | 1 | 0 | -1.675454 | 3.430268  | -1.760920 |
| 89  | 1 | 0 | -2.788952 | 2.806450  | -2.993676 |
| 90  | 6 | 0 | -5.062998 | 0.432830  | -0.257419 |
| 91  | 6 | 0 | -4.518111 | -0.986772 | -0.150437 |
| 92  | 6 | 0 | -6.546662 | 0.338911  | -0.611039 |
| 93  | 1 | 0 | -5.124130 | -1.571728 | 0.554523  |
| 94  | 1 | 0 | -3.486806 | -1.002956 | 0.219466  |
| 95  | 1 | 0 | -4.538705 | -1.499177 | -1.120563 |
| 96  | 1 | 0 | -7.007872 | 1.333436  | -0.675300 |
| 97  | 1 | 0 | -7.092070 | -0.237154 | 0.147895  |
| 98  | 1 | 0 | -6.688016 | -0.161994 | -1.578537 |
| 99  | 1 | 0 | -0.791032 | 1.538218  | 4.557876  |
| 100 | 1 | 0 | -1.331934 | 1.553948  | 4.039350  |

Zero-point correction= 0.796785 (Hartree/Particle)  
Thermal correction to Gibbs Free Energy= 0.716552  
Sum of electronic and zero-point Energies= -4514.703369  
SCF- Energy:M06 (PCM, toluene)/6-31G(d, p) = -4515.5232251 (a.u.)

**R-in-TS2:**

Standard orientation:

| Center<br>Number | Atomic<br>Number | Atomic<br>Type | Coordinates (Angstroms) |           |           |
|------------------|------------------|----------------|-------------------------|-----------|-----------|
|                  |                  |                | X                       | Y         | Z         |
| 1                | 1                | 0              | -5.680189               | -0.372498 | -1.455970 |
| 2                | 6                | 0              | -3.598493               | 1.772154  | -0.524398 |
| 3                | 6                | 0              | -3.926135               | 1.597615  | 0.933074  |
| 4                | 6                | 0              | -4.441855               | 1.374340  | -1.496413 |
| 5                | 6                | 0              | -5.765302               | 0.711520  | -1.240452 |
| 6                | 6                | 0              | -6.179705               | 0.868039  | 0.220963  |
| 7                | 6                | 0              | -5.042142               | 0.583511  | 1.205795  |
| 8                | 8                | 0              | -2.422846               | 2.374821  | -0.754513 |
| 9                | 6                | 0              | -5.539942               | 0.744578  | 2.637268  |
| 10               | 6                | 0              | -4.523995               | -0.842018 | 1.018170  |
| 11               | 1                | 0              | -4.206938               | 2.580300  | 1.349096  |
| 12               | 1                | 0              | -3.003492               | 1.308397  | 1.465849  |
| 13               | 1                | 0              | -7.038178               | 0.211787  | 0.441192  |
| 14               | 1                | 0              | -6.526725               | 1.904580  | 0.378917  |
| 15               | 1                | 0              | -4.160972               | 1.556241  | -2.536800 |
| 16               | 6                | 0              | -6.843520               | 1.267210  | -2.164340 |
| 17               | 1                | 0              | -6.969846               | 2.345643  | -1.999393 |
| 18               | 1                | 0              | -6.577075               | 1.123410  | -3.219121 |
| 19               | 1                | 0              | -7.812303               | 0.779782  | -1.991395 |
| 20               | 1                | 0              | -5.972098               | 1.741193  | 2.800850  |
| 21               | 1                | 0              | -4.715733               | 0.611694  | 3.353464  |
| 22               | 1                | 0              | -6.311495               | -0.001091 | 2.872943  |
| 23               | 1                | 0              | -4.023726               | -0.966714 | 0.051010  |
| 24               | 1                | 0              | -5.346725               | -1.569439 | 1.069814  |
| 25               | 1                | 0              | -3.798492               | -1.103996 | 1.802077  |
| 26               | 6                | 0              | 2.041300                | -2.549292 | -2.985267 |
| 27               | 6                | 0              | 3.210055                | -2.211621 | -2.347968 |
| 28               | 6                | 0              | 3.210207                | -1.606423 | -1.097705 |
| 29               | 6                | 0              | 2.057863                | -1.269434 | -0.418303 |
| 30               | 6                | 0              | 0.837867                | -1.645087 | -1.051496 |
| 31               | 6                | 0              | 0.851702                | -2.255206 | -2.304530 |
| 32               | 6                | 0              | 2.177892                | -0.598408 | 0.904263  |

|     |    |   |           |           |           |
|-----|----|---|-----------|-----------|-----------|
| 33  | 6  | 0 | 2.649329  | -1.313953 | 1.984512  |
| 34  | 6  | 0 | 2.801693  | -0.765583 | 3.251889  |
| 35  | 6  | 0 | 2.500829  | 0.549072  | 3.510362  |
| 36  | 6  | 0 | 2.046355  | 1.312085  | 2.424676  |
| 37  | 6  | 0 | 1.893334  | 0.774917  | 1.147903  |
| 38  | 8  | 0 | 4.492912  | -2.415606 | -2.755559 |
| 39  | 6  | 0 | 5.318043  | -1.810193 | -1.772099 |
| 40  | 8  | 0 | 3.026902  | -2.624251 | 2.009565  |
| 41  | 6  | 0 | 3.293678  | -2.927484 | 3.368644  |
| 42  | 8  | 0 | 3.283267  | -1.713842 | 4.103446  |
| 43  | 8  | 0 | 4.495701  | -1.420652 | -0.683997 |
| 44  | 15 | 0 | -0.764494 | -1.117570 | -0.328011 |
| 45  | 15 | 0 | 1.214455  | 1.780736  | -0.226470 |
| 46  | 1  | 0 | 2.041507  | -3.026483 | -3.960094 |
| 47  | 1  | 0 | -0.094660 | -2.516009 | -2.773284 |
| 48  | 1  | 0 | 2.619553  | 0.975840  | 4.501381  |
| 49  | 1  | 0 | 1.809282  | 2.360480  | 2.591283  |
| 50  | 1  | 0 | 5.803418  | -0.918337 | -2.200551 |
| 51  | 1  | 0 | 6.066683  | -2.532668 | -1.423980 |
| 52  | 1  | 0 | 4.279894  | -3.400139 | 3.453848  |
| 53  | 1  | 0 | 2.507105  | -3.595778 | 3.755763  |
| 54  | 29 | 0 | -0.745074 | 1.006790  | -0.858052 |
| 55  | 6  | 0 | 1.196581  | 3.474235  | 0.450456  |
| 56  | 6  | 0 | 2.334577  | 4.275654  | 0.582061  |
| 57  | 6  | 0 | -0.042129 | 3.953134  | 0.890161  |
| 58  | 6  | 0 | 2.238058  | 5.534091  | 1.163323  |
| 59  | 1  | 0 | 3.298134  | 3.916750  | 0.223004  |
| 60  | 6  | 0 | -0.130779 | 5.210265  | 1.480787  |
| 61  | 1  | 0 | -0.942774 | 3.357226  | 0.727058  |
| 62  | 6  | 0 | 1.006610  | 5.998209  | 1.620141  |
| 63  | 1  | 0 | 3.125311  | 6.156101  | 1.258538  |
| 64  | 1  | 0 | -1.096312 | 5.579371  | 1.818393  |
| 65  | 1  | 0 | 0.933213  | 6.983765  | 2.074945  |
| 66  | 6  | 0 | 2.565555  | 1.720364  | -1.456153 |
| 67  | 6  | 0 | 2.219809  | 1.655256  | -2.808730 |
| 68  | 6  | 0 | 3.916569  | 1.702041  | -1.095097 |
| 69  | 6  | 0 | 3.206757  | 1.562333  | -3.784347 |
| 70  | 1  | 0 | 1.165400  | 1.659996  | -3.087731 |
| 71  | 6  | 0 | 4.902799  | 1.630197  | -2.072610 |
| 72  | 1  | 0 | 4.197662  | 1.708780  | -0.042018 |
| 73  | 6  | 0 | 4.549151  | 1.551634  | -3.417962 |
| 74  | 1  | 0 | 2.925898  | 1.497069  | -4.832747 |
| 75  | 1  | 0 | 5.952069  | 1.624960  | -1.782006 |
| 76  | 1  | 0 | 5.321791  | 1.480333  | -4.180709 |
| 77  | 6  | 0 | -2.033912 | -2.165453 | -1.134982 |
| 78  | 6  | 0 | -2.496052 | -3.379615 | -0.620570 |
| 79  | 6  | 0 | -2.651436 | -1.631697 | -2.272642 |
| 80  | 6  | 0 | -3.553854 | -4.045099 | -1.230789 |
| 81  | 1  | 0 | -2.058202 | -3.796215 | 0.283668  |
| 82  | 6  | 0 | -3.702891 | -2.302788 | -2.886330 |
| 83  | 1  | 0 | -2.328467 | -0.660468 | -2.647960 |
| 84  | 6  | 0 | -4.160030 | -3.508139 | -2.362277 |
| 85  | 1  | 0 | -3.914041 | -4.982042 | -0.811765 |
| 86  | 1  | 0 | -4.182654 | -1.864786 | -3.759082 |
| 87  | 1  | 0 | -4.995547 | -4.024116 | -2.830018 |
| 88  | 6  | 0 | -0.670370 | -1.733031 | 1.391181  |
| 89  | 6  | 0 | -1.106354 | -0.908435 | 2.431203  |
| 90  | 6  | 0 | -0.174820 | -3.005192 | 1.697088  |
| 91  | 6  | 0 | -1.070041 | -1.352518 | 3.749418  |
| 92  | 1  | 0 | -1.462305 | 0.097563  | 2.206387  |
| 93  | 6  | 0 | -0.153047 | -3.455860 | 3.012096  |
| 94  | 1  | 0 | 0.214397  | -3.639680 | 0.900668  |
| 95  | 6  | 0 | -0.599988 | -2.628949 | 4.040558  |
| 96  | 1  | 0 | -1.408561 | -0.698192 | 4.549392  |
| 97  | 1  | 0 | 0.217001  | -4.455207 | 3.235287  |
| 98  | 1  | 0 | -0.577551 | -2.979272 | 5.070086  |
| 99  | 1  | 0 | -1.867656 | 1.914986  | -1.833085 |
| 100 | 1  | 0 | -1.274280 | 1.412862  | -2.441184 |

Zero-point correction= 0.798450 (Hartree/Particle)  
Thermal correction to Gibbs Free Energy= 0.716829  
Sum of electronic and zero-point Energies= -4514.711241  
SCF- Energy:M06 (PCM, toluene)/6-31G(d, p) = -4515.5328813 (a.u.)

**S-in-TS1:**

Standard orientation:

| Center<br>Number | Atomic<br>Number | Atomic<br>Type | Coordinates (Angstroms) |           |           |
|------------------|------------------|----------------|-------------------------|-----------|-----------|
|                  |                  |                | X                       | Y         | Z         |
| 1                | 1                | 0              | 2.023769                | 1.758430  | -1.515241 |
| 2                | 6                | 0              | 4.558421                | 0.267414  | -1.479608 |
| 3                | 6                | 0              | 2.437700                | 1.739988  | 1.213402  |
| 4                | 6                | 0              | 2.681294                | 2.484591  | 0.009852  |
| 5                | 6                | 0              | 4.115092                | 2.523643  | -0.466750 |
| 6                | 6                | 0              | 3.388602                | 0.797091  | 1.751889  |
| 7                | 6                | 0              | 4.715477                | 0.594866  | 1.033951  |
| 8                | 8                | 0              | 3.204958                | 0.186812  | 2.811088  |
| 9                | 1                | 0              | 1.697877                | 2.107594  | 1.924383  |
| 10               | 1                | 0              | 4.600817                | 3.287032  | 0.169986  |
| 11               | 1                | 0              | 4.165533                | 2.904482  | -1.498665 |
| 12               | 1                | 0              | 4.919047                | -0.486758 | 1.012317  |
| 13               | 1                | 0              | 5.452705                | 1.009607  | 1.740285  |
| 14               | 6                | 0              | 2.012259                | 3.833180  | -0.095981 |
| 15               | 1                | 0              | 2.556881                | 4.547405  | 0.538868  |
| 16               | 1                | 0              | 2.017869                | 4.214712  | -1.124251 |
| 17               | 1                | 0              | 0.970813                | 3.812623  | 0.246720  |
| 18               | 6                | 0              | 4.926216                | 1.230166  | -0.352914 |
| 19               | 6                | 0              | 6.406983                | 1.575287  | -0.514907 |
| 20               | 1                | 0              | 3.498855                | -0.007911 | -1.454959 |
| 21               | 1                | 0              | 4.745003                | 0.737061  | -2.455486 |
| 22               | 1                | 0              | 5.165707                | -0.645477 | -1.416379 |
| 23               | 1                | 0              | 6.602006                | 2.018453  | -1.501004 |
| 24               | 1                | 0              | 7.027960                | 0.674092  | -0.423235 |
| 25               | 1                | 0              | 6.737093                | 2.291526  | 0.249273  |
| 26               | 6                | 0              | -3.327462               | -0.599550 | -3.004085 |
| 27               | 6                | 0              | -3.490722               | -1.746836 | -2.267306 |
| 28               | 6                | 0              | -2.930818               | -1.887293 | -1.004332 |
| 29               | 6                | 0              | -2.142476               | -0.921809 | -0.420988 |
| 30               | 6                | 0              | -1.962231               | 0.278386  | -1.167593 |
| 31               | 6                | 0              | -2.553466               | 0.415853  | -2.421223 |
| 32               | 6                | 0              | -1.612931               | -1.096941 | 0.952944  |
| 33               | 6                | 0              | -2.497544               | -1.021331 | 2.009931  |
| 34               | 6                | 0              | -2.094519               | -0.947480 | 3.335049  |
| 35               | 6                | 0              | -0.764090               | -0.913197 | 3.677693  |
| 36               | 6                | 0              | 0.160355                | -1.031668 | 2.630751  |
| 37               | 6                | 0              | -0.237156               | -1.195265 | 1.300505  |
| 38               | 8                | 0              | -4.199247               | -2.867615 | -2.576610 |
| 39               | 6                | 0              | -3.951466               | -3.787463 | -1.523028 |
| 40               | 8                | 0              | -3.856299               | -0.935466 | 1.939694  |
| 41               | 6                | 0              | -4.307331               | -0.736494 | 3.270177  |
| 42               | 8                | 0              | -3.189092               | -0.840072 | 4.138730  |
| 43               | 8                | 0              | -3.280291               | -3.096315 | -0.483060 |
| 44               | 15               | 0              | -0.897271               | 1.589409  | -0.431040 |
| 45               | 15               | 0              | 1.037919                | -1.243816 | -0.014016 |
| 46               | 1                | 0              | -3.780957               | -0.482819 | -3.983475 |
| 47               | 1                | 0              | -2.419284               | 1.341940  | -2.974483 |
| 48               | 1                | 0              | -0.441148               | -0.772476 | 4.704703  |
| 49               | 1                | 0              | 1.218186                | -0.916656 | 2.864806  |
| 50               | 1                | 0              | -3.308571               | -4.601974 | -1.895304 |
| 51               | 1                | 0              | -4.903485               | -4.181797 | -1.147676 |
| 52               | 1                | 0              | -5.045628               | -1.507171 | 3.526807  |
| 53               | 1                | 0              | -4.745798               | 0.270785  | 3.358402  |
| 54               | 29               | 0              | 1.377508                | 0.941714  | -0.334422 |
| 55               | 6                | 0              | 0.326304                | -2.325776 | -1.317884 |
| 56               | 6                | 0              | -0.061752               | -3.636974 | -1.025231 |
| 57               | 6                | 0              | 0.232934                | -1.859822 | -2.628945 |
| 58               | 6                | 0              | -0.554701               | -4.461090 | -2.028704 |



|     |   |   |           |           |           |
|-----|---|---|-----------|-----------|-----------|
| 59  | 1 | 0 | 0.022689  | -4.010961 | -0.004921 |
| 60  | 6 | 0 | -0.272330 | -2.681907 | -3.632530 |
| 61  | 1 | 0 | 0.547356  | -0.840116 | -2.856496 |
| 62  | 6 | 0 | -0.665661 | -3.982293 | -3.333801 |
| 63  | 1 | 0 | -0.845927 | -5.483936 | -1.795620 |
| 64  | 1 | 0 | -0.356730 | -2.305334 | -4.649445 |
| 65  | 1 | 0 | -1.055796 | -4.627232 | -4.118468 |
| 66  | 6 | 0 | 2.399828  | -2.357653 | 0.528886  |
| 67  | 6 | 0 | 2.588270  | -2.924256 | 1.789362  |
| 68  | 6 | 0 | 3.322222  | -2.658858 | -0.482394 |
| 69  | 6 | 0 | 3.691054  | -3.737271 | 2.040309  |
| 70  | 1 | 0 | 1.876955  | -2.749755 | 2.589054  |
| 71  | 6 | 0 | 4.418475  | -3.472331 | -0.233623 |
| 72  | 1 | 0 | 3.171132  | -2.257064 | -1.483730 |
| 73  | 6 | 0 | 4.612798  | -4.006892 | 1.037206  |
| 74  | 1 | 0 | 3.823850  | -4.161155 | 3.032970  |
| 75  | 1 | 0 | 5.122269  | -3.688029 | -1.034897 |
| 76  | 1 | 0 | 5.475088  | -4.637603 | 1.240792  |
| 77  | 6 | 0 | -1.058425 | 3.006263  | -1.582665 |
| 78  | 6 | 0 | -1.623540 | 4.225302  | -1.201311 |
| 79  | 6 | 0 | -0.448002 | 2.910289  | -2.841083 |
| 80  | 6 | 0 | -1.580976 | 5.323156  | -2.057035 |
| 81  | 1 | 0 | -2.087338 | 4.326280  | -0.222129 |
| 82  | 6 | 0 | -0.424883 | 4.000679  | -3.701042 |
| 83  | 1 | 0 | 0.032421  | 1.978835  | -3.137877 |
| 84  | 6 | 0 | -0.985770 | 5.213464  | -3.307804 |
| 85  | 1 | 0 | -2.015672 | 6.268421  | -1.739676 |
| 86  | 1 | 0 | 0.047545  | 3.907548  | -4.676361 |
| 87  | 1 | 0 | -0.953590 | 6.071806  | -3.974959 |
| 88  | 6 | 0 | -1.914530 | 2.092637  | 1.014543  |
| 89  | 6 | 0 | -1.282731 | 2.338917  | 2.234127  |
| 90  | 6 | 0 | -3.307391 | 2.208212  | 0.935131  |
| 91  | 6 | 0 | -2.022752 | 2.692712  | 3.358485  |
| 92  | 1 | 0 | -0.204070 | 2.222108  | 2.312756  |
| 93  | 6 | 0 | -4.046655 | 2.573875  | 2.053568  |
| 94  | 1 | 0 | -3.811816 | 1.999835  | -0.008441 |
| 95  | 6 | 0 | -3.404826 | 2.814265  | 3.268601  |
| 96  | 1 | 0 | -1.514846 | 2.863005  | 4.305567  |
| 97  | 1 | 0 | -5.128651 | 2.667256  | 1.980171  |
| 98  | 1 | 0 | -3.986299 | 3.091147  | 4.145663  |
| 99  | 1 | 0 | 1.165798  | 1.719938  | 4.594614  |
| 100 | 1 | 0 | 1.619814  | 1.301222  | 4.168833  |

Zero-point correction= 0.797247 (Hartree/Particle)  
 Thermal correction to Gibbs Free Energy= 0.718613  
 Sum of electronic and zero-point Energies= -4514.700412  
 SCF- Energy:M06 (PCM, toluene)/6-31G(d, p) = -4515.522531 (a.u.)

**S-in-TS2:**

Standard orientation:

| Center Number | Atomic Number | Atomic Type | Coordinates (Angstroms) |           |           |
|---------------|---------------|-------------|-------------------------|-----------|-----------|
|               |               |             | X                       | Y         | Z         |
| 1             | 6             | 0           | 1.230944                | 0.400529  | 3.770025  |
| 2             | 6             | 0           | 2.036186                | -0.682309 | 3.512125  |
| 3             | 6             | 0           | 2.374635                | -1.045602 | 2.216036  |
| 4             | 6             | 0           | 1.935960                | -0.360865 | 1.101537  |
| 5             | 6             | 0           | 1.194892                | 0.826485  | 1.356034  |
| 6             | 6             | 0           | 0.819731                | 1.151257  | 2.660178  |
| 7             | 6             | 0           | 2.173926                | -0.918488 | -0.254360 |
| 8             | 6             | 0           | 3.442703                | -0.929914 | -0.791088 |
| 9             | 6             | 0           | 3.721616                | -1.387380 | -2.072073 |
| 10            | 6             | 0           | 2.739479                | -1.896710 | -2.885631 |
| 11            | 6             | 0           | 1.443536                | -1.940527 | -2.350684 |
| 12            | 6             | 0           | 1.147952                | -1.485375 | -1.067043 |
| 13            | 8             | 0           | 2.579041                | -1.568043 | 4.392227  |
| 14            | 6             | 0           | 3.249129                | -2.545025 | 3.609973  |
| 15            | 8             | 0           | 4.592075                | -0.494388 | -0.202868 |

|    |    |   |           |           |           |
|----|----|---|-----------|-----------|-----------|
| 16 | 6  | 0 | 5.601266  | -0.587631 | -1.195164 |
| 17 | 8  | 0 | 5.053011  | -1.251184 | -2.323711 |
| 18 | 8  | 0 | 3.125279  | -2.182245 | 2.244121  |
| 19 | 15 | 0 | 0.541778  | 1.778999  | -0.062933 |
| 20 | 15 | 0 | -0.600840 | -1.455859 | -0.492230 |
| 21 | 1  | 0 | 0.930443  | 0.657450  | 4.780956  |
| 22 | 1  | 0 | 0.180958  | 2.015465  | 2.828267  |
| 23 | 1  | 0 | 2.957584  | -2.249079 | -3.888870 |
| 24 | 1  | 0 | 0.640517  | -2.341642 | -2.965113 |
| 25 | 1  | 0 | 2.779452  | -3.527835 | 3.771448  |
| 26 | 1  | 0 | 4.311846  | -2.574246 | 3.887593  |
| 27 | 1  | 0 | 6.448082  | -1.165731 | -0.804039 |
| 28 | 1  | 0 | 5.921578  | 0.425229  | -1.486430 |
| 29 | 6  | 0 | -1.431426 | -2.723814 | -1.538058 |
| 30 | 6  | 0 | -1.068781 | -4.076204 | -1.570639 |
| 31 | 6  | 0 | -2.514961 | -2.303385 | -2.312506 |
| 32 | 6  | 0 | -1.777637 | -4.981258 | -2.349762 |
| 33 | 1  | 0 | -0.224954 | -4.434076 | -0.986458 |
| 34 | 6  | 0 | -3.229564 | -3.212050 | -3.088890 |
| 35 | 1  | 0 | -2.802029 | -1.254829 | -2.328632 |
| 36 | 6  | 0 | -2.865046 | -4.551822 | -3.107476 |
| 37 | 1  | 0 | -1.481501 | -6.027944 | -2.362859 |
| 38 | 1  | 0 | -4.070896 | -2.858535 | -3.680868 |
| 39 | 1  | 0 | -3.422565 | -5.263668 | -3.712379 |
| 40 | 6  | 0 | -0.461835 | -2.303065 | 1.139391  |
| 41 | 6  | 0 | -1.207516 | -1.829022 | 2.219191  |
| 42 | 6  | 0 | 0.350592  | -3.426716 | 1.335516  |
| 43 | 6  | 0 | -1.181789 | -2.479433 | 3.449794  |
| 44 | 1  | 0 | -1.800385 | -0.924983 | 2.100620  |
| 45 | 6  | 0 | 0.366677  | -4.088767 | 2.557038  |
| 46 | 1  | 0 | 1.011774  | -3.765615 | 0.538984  |
| 47 | 6  | 0 | -0.407415 | -3.621382 | 3.617303  |
| 48 | 1  | 0 | -1.768686 | -2.088869 | 4.278143  |
| 49 | 1  | 0 | 0.990923  | -4.971989 | 2.682924  |
| 50 | 1  | 0 | -0.392351 | -4.137334 | 4.574845  |
| 51 | 6  | 0 | 0.378387  | 3.519679  | 0.506291  |
| 52 | 6  | 0 | -0.409334 | 4.333536  | -0.314880 |
| 53 | 6  | 0 | 1.056727  | 4.110445  | 1.577145  |
| 54 | 6  | 0 | -0.543672 | 5.692925  | -0.058008 |
| 55 | 1  | 0 | -0.909281 | 3.892641  | -1.176871 |
| 56 | 6  | 0 | 0.917640  | 5.469526  | 1.838873  |
| 57 | 1  | 0 | 1.699645  | 3.509846  | 2.216873  |
| 58 | 6  | 0 | 0.113549  | 6.262860  | 1.027320  |
| 59 | 1  | 0 | -1.163783 | 6.306448  | -0.707640 |
| 60 | 1  | 0 | 1.447348  | 5.911660  | 2.680001  |
| 61 | 1  | 0 | 0.005251  | 7.324721  | 1.236113  |
| 62 | 6  | 0 | 1.987809  | 1.979151  | -1.181354 |
| 63 | 6  | 0 | 1.814048  | 1.733811  | -2.544082 |
| 64 | 6  | 0 | 3.227003  | 2.430700  | -0.717267 |
| 65 | 6  | 0 | 2.872949  | 1.917339  | -3.429617 |
| 66 | 1  | 0 | 0.843905  | 1.388598  | -2.904139 |
| 67 | 6  | 0 | 4.278545  | 2.626668  | -1.603845 |
| 68 | 1  | 0 | 3.374345  | 2.621740  | 0.345307  |
| 69 | 6  | 0 | 4.104059  | 2.363411  | -2.962353 |
| 70 | 1  | 0 | 2.731659  | 1.713510  | -4.488626 |
| 71 | 1  | 0 | 5.237643  | 2.987083  | -1.235277 |
| 72 | 1  | 0 | 4.928760  | 2.512731  | -3.656295 |
| 73 | 29 | 0 | -1.242163 | 0.686269  | -0.856733 |
| 74 | 1  | 0 | -1.289460 | 0.713117  | -2.593595 |
| 75 | 1  | 0 | -2.304394 | 0.802352  | -2.747583 |
| 76 | 6  | 0 | -3.445012 | 2.271560  | 0.693515  |
| 77 | 6  | 0 | -4.918556 | 0.317381  | -0.832230 |
| 78 | 6  | 0 | -2.959853 | 1.895081  | -0.687662 |
| 79 | 6  | 0 | -3.728162 | 1.006569  | -1.433159 |
| 80 | 8  | 0 | -3.514452 | 0.776583  | -2.695206 |
| 81 | 1  | 0 | -5.778866 | 0.935846  | -1.139770 |
| 82 | 1  | 0 | -5.064516 | -0.643726 | -1.346968 |
| 83 | 1  | 0 | -2.547386 | 2.718542  | -1.275742 |
| 84 | 6  | 0 | -3.916787 | 1.022888  | 1.434480  |

|     |   |   |           |           |          |
|-----|---|---|-----------|-----------|----------|
| 85  | 1 | 0 | -4.324733 | 1.297403  | 2.420018 |
| 86  | 1 | 0 | -3.014085 | 0.429238  | 1.633581 |
| 87  | 6 | 0 | -4.940440 | 0.120684  | 0.701931 |
| 88  | 6 | 0 | -4.603510 | -1.339787 | 1.007813 |
| 89  | 6 | 0 | -6.353631 | 0.401804  | 1.215917 |
| 90  | 1 | 0 | -3.646026 | -1.627483 | 0.550890 |
| 91  | 1 | 0 | -5.375715 | -2.014807 | 0.614934 |
| 92  | 1 | 0 | -4.524324 | -1.509182 | 2.091203 |
| 93  | 1 | 0 | -6.438010 | 0.154872  | 2.282847 |
| 94  | 1 | 0 | -6.625695 | 1.458110  | 1.094369 |
| 95  | 1 | 0 | -7.094088 | -0.201377 | 0.672676 |
| 96  | 1 | 0 | -2.589347 | 2.670601  | 1.266182 |
| 97  | 6 | 0 | -4.493337 | 3.381145  | 0.629781 |
| 98  | 1 | 0 | -4.859069 | 3.654774  | 1.628786 |
| 99  | 1 | 0 | -5.359404 | 3.089153  | 0.021411 |
| 100 | 1 | 0 | -4.071188 | 4.283706  | 0.169125 |

-----  
 Zero-point correction= 0.798273 (Hartree/Particle)  
 Thermal correction to Gibbs Free Energy= 0.717367  
 Sum of electronic and zero-point Energies= -4514.710954  
 SCF- Energy:M06 (PCM, toluene)/6-31G(d, p) = -4515.5324748 (a.u.)

### S8. Gibbs Energies ( $\Delta G^\ddagger$ )\* at the M06(PCM, toluene)/6-31G(d,p) Level

| Species          | $G^\ddagger$ (au.) | $\Delta G^\ddagger$ (kJ/mol) <sup>[a]</sup> | Configuration of product |
|------------------|--------------------|---------------------------------------------|--------------------------|
| <i>R-out-TS1</i> | -4514.818456       | 0.0                                         | <i>R</i>                 |
| <i>R-in-TS1</i>  | -4514.806671       | 31.0                                        | <i>R</i>                 |
| <i>S-out-TS1</i> | -4514.814984       | 9.2                                         | <i>S</i>                 |
| <i>S-in-TS1</i>  | -4514.803918       | 38.2                                        | <i>S</i>                 |
| Species          | $G^\ddagger$ (au.) | $\Delta G^\ddagger$ (kJ/mol) <sup>[b]</sup> | Configuration of product |
| <i>R-out-TS2</i> | -4514.822386       | 0.0                                         | <i>R</i>                 |
| <i>R-in-TS2</i>  | -4514.816052       | 16.6                                        | <i>R</i>                 |
| <i>S-out-TS2</i> | -4514.821204       | 3.1                                         | <i>S</i>                 |
| <i>S-in-TS2</i>  | -4514.815108       | 19.1                                        | <i>S</i>                 |

[a] with respect to *R-out-TS1* [b] with respect to *R-out-TS2*

### S9. Reference 16 details

Gaussian 09, Revision A.1, M. J. Frisch, G. W. Trucks, H. B. Schlegel, G. E. Scuseria, M. A. Robb, J. R. Cheeseman, G. Scalmani, V. Barone, B. Mennucci, G. A. Petersson, H. Nakatsuji, M. Caricato, X. Li, H. P. Hratchian, A. F. Izmaylov, J. Bloino, G. Zheng, J. L. Sonnenberg, M. Hada, M. Ehara, K. Toyota, R. Fukuda, J. Hasegawa, M. Ishida, T. Nakajima, Y. Honda, O. Kitao, H. Nakai, T. Vreven, J. A. Montgomery, Jr., J. E. Peralta, F. Ogliaro, M. Bearpark, J. J. Heyd, E. Brothers, K. N. Kudin, V. N. Staroverov, R. Kobayashi, J. Normand, K. Raghavachari, A. Rendell, J. C. Burant, S. S. Iyengar, J. Tomasi, M. Cossi, N. Rega, J. M. Millam, M. Klene, J. E. Knox, J. B. Cross, V. Bakken, C. Adamo, J. Jaramillo, R. Gomperts, R. E. Stratmann, O. Yazyev, A. J. Austin, R. Cammi, C. Pomelli, J. W. Ochterski, R. L. Martin, K. Morokuma, V. G. Zakrzewski, G. A. Voth, P. Salvador, J. J. Dannenberg, S. Dapprich, A. D. Daniels, Ö. Farkas, J. B. Foresman, J. V. Ortiz, J. Cioslowski, and D. J. Fox, Gaussian, Inc., Wallingford CT, 2009.
